# Supplementary material
Source: publisher figshare collection journal article supplement (https://acs.figshare.com/ndownloader/files/27829985)
Supplement: Supplementary file 1 [file 27829985]

## Sheet: Fraction1+2
Table S2. N-glycopeptides identified in each fraction in the pooled cirrhosis samples
Fraction 1 + 2
			Cirrhosis_Fc12r1 (%)	Cirrhosis _Fc12r2(%)
Protein\nname	Sequence\n(unformatted)	Glycans
sp|O75882|ATRN_HUMAN Attractin OS=Homo sapiens GN=ATRN PE=1 SV=2	EWLPLNR	HexNAc(4)Hex(5)NeuAc(2)	0.00722
sp|O75882|ATRN_HUMAN Attractin OS=Homo sapiens GN=ATRN PE=1 SV=2	CENLTTGK	HexNAc(4)Hex(5)Fuc(1)NeuAc(1)		0.0265
sp|O75882|ATRN_HUMAN Attractin OS=Homo sapiens GN=ATRN PE=1 SV=2	IDSTGNVTNELR	HexNAc(2)Hex(9)	0.0572
sp|O75882|ATRN_HUMAN Attractin OS=Homo sapiens GN=ATRN PE=1 SV=2	NHSCSEGQISIFR	HexNAc(4)Hex(5)NeuAc(2)	0.0603	0.0593
sp|O75882|ATRN_HUMAN Attractin OS=Homo sapiens GN=ATRN PE=1 SV=2	IDSTGNVTNELR	HexNAc(3)Hex(6)NeuAc(1)	0.0869	0.0919
sp|O75882|ATRN_HUMAN Attractin OS=Homo sapiens GN=ATRN PE=1 SV=2	CINQSICEK	HexNAc(4)Hex(5)NeuAc(2)	0.273	0.275
sp|O75882|ATRN_HUMAN Attractin OS=Homo sapiens GN=ATRN PE=1 SV=2	CENLTTGK	HexNAc(4)Hex(5)NeuAc(2)	0.298	0.275
sp|O75882|ATRN_HUMAN Attractin OS=Homo sapiens GN=ATRN PE=1 SV=2	IDSTGNVTNELR	HexNAc(2)Hex(7)	0.37	0.356
sp|O75882|ATRN_HUMAN Attractin OS=Homo sapiens GN=ATRN PE=1 SV=2	IDSTGNVTNELR	HexNAc(2)Hex(8)	0.385	0.371
sp|O75882|ATRN_HUMAN Attractin OS=Homo sapiens GN=ATRN PE=1 SV=2	GICNSSDVR	HexNAc(4)Hex(5)NeuAc(2)	0.421	0.442
sp|O75882|ATRN_HUMAN Attractin OS=Homo sapiens GN=ATRN PE=1 SV=2	IDSTGNVTNELR	HexNAc(2)Hex(6)		0.607
sp|O75882|ATRN_HUMAN Attractin OS=Homo sapiens GN=ATRN PE=1 SV=2	IDSTGNVTNELR	HexNAc(2)Hex(5)	1.24	1.24
sp|O95497|VNN1_HUMAN Pantetheinase OS=Homo sapiens GN=VNN1 PE=1 SV=2	LTGVAGNYTVCQK	HexNAc(6)Hex(7)NeuAc(2)	0
sp|P00450|CERU_HUMAN Ceruloplasmin OS=Homo sapiens GN=CP PE=1 SV=1	AGLQAFFQVQECNK	HexNAc(6)Hex(6)Fuc(1)NeuAc(1)		0
sp|P00450|CERU_HUMAN Ceruloplasmin OS=Homo sapiens GN=CP PE=1 SV=1	ENLTAPGSDSAVFFEQGTTR	HexNAc(4)Hex(5)Fuc(2)NeuAc(1)		0.000951
sp|P00450|CERU_HUMAN Ceruloplasmin OS=Homo sapiens GN=CP PE=1 SV=1	EHEGAIYPDNTTDFQR	HexNAc(6)Hex(7)NeuAc(4)	0.00179
sp|P00450|CERU_HUMAN Ceruloplasmin OS=Homo sapiens GN=CP PE=1 SV=1	ENLTAPGSDSAVFFEQGTTR	HexNAc(4)Hex(5)NeuAc(2)		0.00234
sp|P00450|CERU_HUMAN Ceruloplasmin OS=Homo sapiens GN=CP PE=1 SV=1	EHEGAIYPDNTTDFQR	HexNAc(6)Hex(7)Fuc(3)NeuAc(3)		0.00607
sp|P00450|CERU_HUMAN Ceruloplasmin OS=Homo sapiens GN=CP PE=1 SV=1	EHEGAIYPDNTTDFQR	HexNAc(2)Hex(11)		0.0129
sp|P00450|CERU_HUMAN Ceruloplasmin OS=Homo sapiens GN=CP PE=1 SV=1	EHEGAIYPDNTTDFQR	HexNAc(6)Hex(7)Fuc(1)NeuAc(4)	0.0132	0.0127
sp|P00450|CERU_HUMAN Ceruloplasmin OS=Homo sapiens GN=CP PE=1 SV=1	EHEGAIYPDNTTDFQR	HexNAc(5)Hex(6)Fuc(4)NeuAc(1)		0.014
sp|P00450|CERU_HUMAN Ceruloplasmin OS=Homo sapiens GN=CP PE=1 SV=1	EHEGAIYPDNTTDFQR	HexNAc(5)Hex(6)Fuc(2)NeuAc(2)	0.0257	0.0279
sp|P00450|CERU_HUMAN Ceruloplasmin OS=Homo sapiens GN=CP PE=1 SV=1	EHEGAIYPDNTTDFQR	HexNAc(4)Hex(5)NeuAc(1)	0.0508	0.0505
sp|P00450|CERU_HUMAN Ceruloplasmin OS=Homo sapiens GN=CP PE=1 SV=1	EHEGAIYPDNTTDFQR	HexNAc(5)Hex(6)Fuc(1)NeuAc(2)	0.0781
sp|P00450|CERU_HUMAN Ceruloplasmin OS=Homo sapiens GN=CP PE=1 SV=1	EHEGAIYPDNTTDFQR	HexNAc(7)Hex(8)Fuc(1)NeuAc(1)	0.0967
sp|P00450|CERU_HUMAN Ceruloplasmin OS=Homo sapiens GN=CP PE=1 SV=1	ELHHLQEQNVSNAFLDK	HexNAc(5)Hex(6)NeuAc(3)	0.0984	0.35
sp|P00450|CERU_HUMAN Ceruloplasmin OS=Homo sapiens GN=CP PE=1 SV=1	EHEGAIYPDNTTDFQR	HexNAc(6)Hex(7)	0.131
sp|P00450|CERU_HUMAN Ceruloplasmin OS=Homo sapiens GN=CP PE=1 SV=1	ELHHLQEQNVSNAFLDK	HexNAc(4)Hex(5)Fuc(1)NeuAc(2)	0.138	0.424
sp|P00450|CERU_HUMAN Ceruloplasmin OS=Homo sapiens GN=CP PE=1 SV=1	ELHHLQEQNVSNAFLDK	HexNAc(4)Hex(5)NeuAc(2)	0.164	0.0778
sp|P00450|CERU_HUMAN Ceruloplasmin OS=Homo sapiens GN=CP PE=1 SV=1	ELHHLQEQNVSNAFLDK	HexNAc(5)Hex(6)Fuc(1)NeuAc(3)	0.198	0.214
sp|P00450|CERU_HUMAN Ceruloplasmin OS=Homo sapiens GN=CP PE=1 SV=1	EHEGAIYPDNTTDFQR	HexNAc(5)Hex(6)Fuc(2)NeuAc(3)	0.293	0.408
sp|P00450|CERU_HUMAN Ceruloplasmin OS=Homo sapiens GN=CP PE=1 SV=1	EHEGAIYPDNTTDFQR	HexNAc(5)Hex(6)NeuAc(3)	0.801	0.92
sp|P00450|CERU_HUMAN Ceruloplasmin OS=Homo sapiens GN=CP PE=1 SV=1	EHEGAIYPDNTTDFQR	HexNAc(5)Hex(6)Fuc(1)NeuAc(3)	1.27	1.49
sp|P00450|CERU_HUMAN Ceruloplasmin OS=Homo sapiens GN=CP PE=1 SV=1	EHEGAIYPDNTTDFQR	HexNAc(4)Hex(5)NeuAc(2)	5.26	4.65
sp|P00450|CERU_HUMAN Ceruloplasmin OS=Homo sapiens GN=CP PE=1 SV=1	EHEGAIYPDNTTDFQR	HexNAc(4)Hex(5)Fuc(1)NeuAc(2)	6.2	3.21
sp|P00734|THRB_HUMAN Prothrombin OS=Homo sapiens GN=F2 PE=1 SV=2	NFTENDLLVR	HexNAc(4)Hex(5)Fuc(2)NeuAc(1)	0.000854
sp|P00734|THRB_HUMAN Prothrombin OS=Homo sapiens GN=F2 PE=1 SV=2	NFTENDLLVR	HexNAc(4)Hex(5)NeuAc(1)	0.0128
sp|P00734|THRB_HUMAN Prothrombin OS=Homo sapiens GN=F2 PE=1 SV=2	GHVNITR	HexNAc(4)Hex(5)Fuc(1)NeuAc(2)	0.0873
sp|P00734|THRB_HUMAN Prothrombin OS=Homo sapiens GN=F2 PE=1 SV=2	NFTENDLLVR	HexNAc(4)Hex(5)NeuAc(2)	0.106	0.0751
sp|P00734|THRB_HUMAN Prothrombin OS=Homo sapiens GN=F2 PE=1 SV=2	GHVNITR	HexNAc(4)Hex(5)NeuAc(1)	0.137	0.135
sp|P00734|THRB_HUMAN Prothrombin OS=Homo sapiens GN=F2 PE=1 SV=2	GHVNITR	HexNAc(3)Hex(4)NeuAc(1)	0.163	0.152
sp|P00734|THRB_HUMAN Prothrombin OS=Homo sapiens GN=F2 PE=1 SV=2	GHVNITR	HexNAc(4)Hex(5)NeuAc(2)	11.6	10.6
sp|P00736|C1R_HUMAN Complement C1r subcomponent OS=Homo sapiens GN=C1R PE=1 SV=2	CNYSIR	HexNAc(4)Hex(5)NeuAc(1)	0.102	0.167
sp|P00742|FA10_HUMAN Coagulation factor X OS=Homo sapiens GN=F10 PE=1 SV=2	GDNNLTR	HexNAc(4)Hex(5)NeuAc(2)		0.241
sp|P00748|FA12_HUMAN Coagulation factor XII OS=Homo sapiens GN=F12 PE=1 SV=3	NVTAEQAR	HexNAc(3)Hex(4)NeuAc(1)	0.0222
sp|P00748|FA12_HUMAN Coagulation factor XII OS=Homo sapiens GN=F12 PE=1 SV=3	RNHSCEPCQTLAVR	HexNAc(4)Hex(5)NeuAc(1)	0.026
sp|P00748|FA12_HUMAN Coagulation factor XII OS=Homo sapiens GN=F12 PE=1 SV=3	RNHSCEPCQTLAVR	HexNAc(3)Hex(4)NeuAc(1)	0.0479	0.0447
sp|P00748|FA12_HUMAN Coagulation factor XII OS=Homo sapiens GN=F12 PE=1 SV=3	NVTAEQAR	HexNAc(4)Hex(5)Fuc(1)NeuAc(2)	0.087	0.0872
sp|P00748|FA12_HUMAN Coagulation factor XII OS=Homo sapiens GN=F12 PE=1 SV=3	RNHSCEPCQTLAVR	HexNAc(4)Hex(5)NeuAc(2)	0.493	0.479
sp|P00748|FA12_HUMAN Coagulation factor XII OS=Homo sapiens GN=F12 PE=1 SV=3	NHSCEPCQTLAVR	HexNAc(4)Hex(5)NeuAc(2)	0.954	1.2
sp|P00748|FA12_HUMAN Coagulation factor XII OS=Homo sapiens GN=F12 PE=1 SV=3	NVTAEQAR	HexNAc(4)Hex(5)NeuAc(2)	2.46	2.21
sp|P01008|ANT3_HUMAN Antithrombin-III OS=Homo sapiens GN=SERPINC1 PE=1 SV=1	WVSNKTEGR	HexNAc(4)Hex(5)NeuAc(2)	0.0635
sp|P01008|ANT3_HUMAN Antithrombin-III OS=Homo sapiens GN=SERPINC1 PE=1 SV=1	WVSNK	HexNAc(4)Hex(5)NeuAc(1)	0.086	0.0839
sp|P01008|ANT3_HUMAN Antithrombin-III OS=Homo sapiens GN=SERPINC1 PE=1 SV=1	WVSNK	HexNAc(3)Hex(4)NeuAc(1)	0.183	0.159
sp|P01008|ANT3_HUMAN Antithrombin-III OS=Homo sapiens GN=SERPINC1 PE=1 SV=1	WVSNK	HexNAc(4)Hex(5)Fuc(1)NeuAc(2)		0.209
sp|P01008|ANT3_HUMAN Antithrombin-III OS=Homo sapiens GN=SERPINC1 PE=1 SV=1	WVSNK	HexNAc(4)Hex(5)NeuAc(2)	6.12	5.52
sp|P01011|AACT_HUMAN Alpha-1-antichymotrypsin OS=Homo sapiens GN=SERPINA3 PE=1 SV=2	FNLTETSEAEIHQSFQHLLR	HexNAc(5)Hex(6)NeuAc(3)	0.000948
sp|P01019|ANGT_HUMAN Angiotensinogen OS=Homo sapiens GN=AGT PE=1 SV=1	DKNCTSR	HexNAc(5)Hex(6)NeuAc(3)	0.109
sp|P01031|CO5_HUMAN Complement C5 OS=Homo sapiens GN=C5 PE=1 SV=4	ANISHK	HexNAc(5)Hex(6)Fuc(1)NeuAc(3)		0.00841
sp|P01031|CO5_HUMAN Complement C5 OS=Homo sapiens GN=C5 PE=1 SV=4	ANISHK	HexNAc(5)Hex(6)NeuAc(3)	0.0134
sp|P01042|KNG1_HUMAN Kininogen-1 OS=Homo sapiens GN=KNG1 PE=1 SV=2	ITYSIVQTNCSK	HexNAc(7)Hex(8)NeuAc(1)	0.00121
sp|P01042|KNG1_HUMAN Kininogen-1 OS=Homo sapiens GN=KNG1 PE=1 SV=2	ITYSIVQTNCSK	HexNAc(6)Hex(6)Fuc(1)NeuAc(2)		0.00297
sp|P01042|KNG1_HUMAN Kininogen-1 OS=Homo sapiens GN=KNG1 PE=1 SV=2	ITYSIVQTNCSK	HexNAc(4)Hex(5)NeuAc(2)	0.0285	0.03
sp|P01042|KNG1_HUMAN Kininogen-1 OS=Homo sapiens GN=KNG1 PE=1 SV=2	ITYSIVQTNCSK	HexNAc(5)Hex(6)Fuc(1)NeuAc(3)	0.125	0.141
sp|P01042|KNG1_HUMAN Kininogen-1 OS=Homo sapiens GN=KNG1 PE=1 SV=2	ITYSIVQTNCSK	HexNAc(5)Hex(6)NeuAc(3)	0.168	0.177
sp|P01591|IGJ_HUMAN Immunoglobulin J chain OS=Homo sapiens GN=JCHAIN PE=1 SV=4	ENISDPTSPLR	HexNAc(3)Hex(5)NeuAc(1)		0.0282
sp|P01591|IGJ_HUMAN Immunoglobulin J chain OS=Homo sapiens GN=JCHAIN PE=1 SV=4	ENISDPTSPLR	HexNAc(5)Hex(5)NeuAc(1)	0.0408	0.0373
sp|P01591|IGJ_HUMAN Immunoglobulin J chain OS=Homo sapiens GN=JCHAIN PE=1 SV=4	ENISDPTSPLR	HexNAc(4)Hex(5)Fuc(1)NeuAc(2)	0.149	0.135
sp|P01591|IGJ_HUMAN Immunoglobulin J chain OS=Homo sapiens GN=JCHAIN PE=1 SV=4	ENISDPTSPLR	HexNAc(4)Hex(5)NeuAc(1)		0.152
sp|P01591|IGJ_HUMAN Immunoglobulin J chain OS=Homo sapiens GN=JCHAIN PE=1 SV=4	ENISDPTSPLR	HexNAc(4)Hex(5)Fuc(1)NeuAc(1)		0.164
sp|P01591|IGJ_HUMAN Immunoglobulin J chain OS=Homo sapiens GN=JCHAIN PE=1 SV=4	ENISDPTSPLR	HexNAc(4)Hex(5)NeuAc(2)	0.218	0.2
sp|P01859|IGHG2_HUMAN Ig gamma-2 chain C region OS=Homo sapiens GN=IGHG2 PE=1 SV=2	EEQFNSTFR	HexNAc(4)Hex(5)Fuc(1)	0.0378	0.0789
sp|P01859|IGHG2_HUMAN Ig gamma-2 chain C region OS=Homo sapiens GN=IGHG2 PE=1 SV=2	EEQFNSTFR	HexNAc(4)Hex(3)	0.0459	0.0673
sp|P01859|IGHG2_HUMAN Ig gamma-2 chain C region OS=Homo sapiens GN=IGHG2 PE=1 SV=2	EEQFNSTFR	HexNAc(4)Hex(4)Fuc(1)NeuAc(1)	0.0502
sp|P01859|IGHG2_HUMAN Ig gamma-2 chain C region OS=Homo sapiens GN=IGHG2 PE=1 SV=2	EEQFNSTFR	HexNAc(5)Hex(3)Fuc(1)	0.0833	0.0821
sp|P01859|IGHG2_HUMAN Ig gamma-2 chain C region OS=Homo sapiens GN=IGHG2 PE=1 SV=2	EEQFNSTFR	HexNAc(4)Hex(4)Fuc(1)	0.566	0.321
sp|P01859|IGHG2_HUMAN Ig gamma-2 chain C region OS=Homo sapiens GN=IGHG2 PE=1 SV=2	EEQFNSTFR	HexNAc(4)Hex(3)Fuc(1)	1.06	1.15
sp|P01860|IGHG3_HUMAN Ig gamma-3 chain C region OS=Homo sapiens GN=IGHG3 PE=1 SV=2	EEQYNSTFR	HexNAc(4)Hex(4)Fuc(1)	0.0469
sp|P01877|IGHA2_HUMAN Ig alpha-2 chain C region OS=Homo sapiens GN=IGHA2 PE=1 SV=3	TPLTANITK	HexNAc(5)Hex(5)Fuc(1)NeuAc(2)	0.287	0.216
sp|P01877|IGHA2_HUMAN Ig alpha-2 chain C region OS=Homo sapiens GN=IGHA2 PE=1 SV=3	TPLTANITK	HexNAc(4)Hex(5)Fuc(1)NeuAc(2)	0.329	0.282
sp|P01877|IGHA2_HUMAN Ig alpha-2 chain C region OS=Homo sapiens GN=IGHA2 PE=1 SV=3	TPLTANITK	HexNAc(4)Hex(5)Fuc(1)NeuAc(1)	0.491	0.604
sp|P01877|IGHA2_HUMAN Ig alpha-2 chain C region OS=Homo sapiens GN=IGHA2 PE=1 SV=3	TPLTANITK	HexNAc(5)Hex(5)Fuc(1)NeuAc(1)	0.643	0.747
sp|P01880|IGHD_HUMAN Ig delta chain C region OS=Homo sapiens GN=IGHD PE=1 SV=2	TLLNASR	HexNAc(5)Hex(5)NeuAc(2)	0.0763
sp|P02749|APOH_HUMAN Beta-2-glycoprotein 1 OS=Homo sapiens GN=APOH PE=1 SV=3	VYKPSAGNNSLYR	HexNAc(5)Hex(6)Fuc(1)NeuAc(3)		0.00377
sp|P02749|APOH_HUMAN Beta-2-glycoprotein 1 OS=Homo sapiens GN=APOH PE=1 SV=3	VYKPSAGNNSLYR	HexNAc(5)Hex(6)NeuAc(3)	0.016	0.0159
sp|P02749|APOH_HUMAN Beta-2-glycoprotein 1 OS=Homo sapiens GN=APOH PE=1 SV=3	VYKPSAGNNSLYR	HexNAc(4)Hex(5)Fuc(1)NeuAc(2)	0.0718	0.0553
sp|P02749|APOH_HUMAN Beta-2-glycoprotein 1 OS=Homo sapiens GN=APOH PE=1 SV=3	PSAGNNSLYR	HexNAc(4)Hex(6)NeuAc(1)	0.0984	0.104
sp|P02749|APOH_HUMAN Beta-2-glycoprotein 1 OS=Homo sapiens GN=APOH PE=1 SV=3	PSAGNNSLYR	HexNAc(4)Hex(5)NeuAc(2)	0.253	0.318
sp|P02749|APOH_HUMAN Beta-2-glycoprotein 1 OS=Homo sapiens GN=APOH PE=1 SV=3	VYKPSAGNNSLYR	HexNAc(4)Hex(5)NeuAc(2)	0.434	0.304
sp|P02750|A2GL_HUMAN Leucine-rich alpha-2-glycoprotein OS=Homo sapiens GN=LRG1 PE=1 SV=2	MFSQNDTR	HexNAc(4)Hex(5)NeuAc(2)		0.571
sp|P02765|FETUA_HUMAN Alpha-2-HS-glycoprotein OS=Homo sapiens GN=AHSG PE=1 SV=1	VCQDCPLLAPLNDTR	HexNAc(5)Hex(6)Fuc(1)NeuAc(3)		0.0013
sp|P02765|FETUA_HUMAN Alpha-2-HS-glycoprotein OS=Homo sapiens GN=AHSG PE=1 SV=1	VCQDCPLLAPLNDTR	HexNAc(4)Hex(5)NeuAc(2)	0.0288	0.0508
sp|P02765|FETUA_HUMAN Alpha-2-HS-glycoprotein OS=Homo sapiens GN=AHSG PE=1 SV=1	VCQDCPLLAPLNDTR	HexNAc(4)Hex(5)Fuc(2)NeuAc(1)		0.0397
sp|P02774|VTDB_HUMAN Vitamin D-binding protein OS=Homo sapiens GN=GC PE=1 SV=1	LCDNLSTK	HexNAc(4)Hex(5)NeuAc(2)	0.063	0.0788
sp|P02787|TRFE_HUMAN Serotransferrin OS=Homo sapiens GN=TF PE=1 SV=3	CGLVPVLAENYNK	HexNAc(4)Hex(5)Fuc(2)NeuAc(1)	8.38e-05
sp|P02787|TRFE_HUMAN Serotransferrin OS=Homo sapiens GN=TF PE=1 SV=3	CGLVPVLAENYNK	HexNAc(4)Hex(5)NeuAc(2)		0.000564
sp|P02790|HEMO_HUMAN Hemopexin OS=Homo sapiens GN=HPX PE=1 SV=2	NGTGHGNSTHHGPEYMR	HexNAc(4)Hex(5)	0.00591
sp|P02790|HEMO_HUMAN Hemopexin OS=Homo sapiens GN=HPX PE=1 SV=2	NGTGHGNSTHHGPEYMR	HexNAc(5)Hex(6)NeuAc(3)	0.0159	0.575
sp|P02790|HEMO_HUMAN Hemopexin OS=Homo sapiens GN=HPX PE=1 SV=2	NGTGHGNSTHHGPEYMR	HexNAc(3)Hex(4)	0.0173	0.00273
sp|P02790|HEMO_HUMAN Hemopexin OS=Homo sapiens GN=HPX PE=1 SV=2	NGTGHGNSTHHGPEYMR	HexNAc(4)Hex(5)Fuc(1)NeuAc(1)		0.0191
sp|P02790|HEMO_HUMAN Hemopexin OS=Homo sapiens GN=HPX PE=1 SV=2	NGTGHGNSTHHGPEYMR	HexNAc(5)Hex(6)Fuc(1)NeuAc(2)	0.0193
sp|P02790|HEMO_HUMAN Hemopexin OS=Homo sapiens GN=HPX PE=1 SV=2	NGTGHGNSTHHGPEYMR	HexNAc(3)Hex(4)NeuAc(1)	0.138	0.0614
sp|P02790|HEMO_HUMAN Hemopexin OS=Homo sapiens GN=HPX PE=1 SV=2	NGTGHGNSTHHGPEYMR	HexNAc(4)Hex(5)NeuAc(1)	0.233	0.191
sp|P02790|HEMO_HUMAN Hemopexin OS=Homo sapiens GN=HPX PE=1 SV=2	NGTGHGNSTHHGPEYMR	HexNAc(4)Hex(5)Fuc(1)NeuAc(2)	0.807	0.0044
sp|P02790|HEMO_HUMAN Hemopexin OS=Homo sapiens GN=HPX PE=1 SV=2	NGTGHGNSTHHGPEYMR	HexNAc(4)Hex(5)NeuAc(2)	4.49	3.73
sp|P03951|FA11_HUMAN Coagulation factor XI OS=Homo sapiens GN=F11 PE=1 SV=1	GINYNSSVAK	HexNAc(4)Hex(5)NeuAc(2)	0.0687	0.12
sp|P03952|KLKB1_HUMAN Plasma kallikrein OS=Homo sapiens GN=KLKB1 PE=1 SV=1	GVNFNVSK	HexNAc(4)Hex(5)NeuAc(1)	0.0469	0.0916
sp|P03952|KLKB1_HUMAN Plasma kallikrein OS=Homo sapiens GN=KLKB1 PE=1 SV=1	GVNFNVSK	HexNAc(4)Hex(5)NeuAc(2)	1.21	1.52
sp|P04004|VTNC_HUMAN Vitronectin OS=Homo sapiens GN=VTN PE=1 SV=1	NNATVHEQVGGPSLTSDLQAQSK	HexNAc(4)Hex(5)NeuAc(2)		0.0356
sp|P04070|PROC_HUMAN Vitamin K-dependent protein C OS=Homo sapiens GN=PROC PE=1 SV=1	EVFVHPNYSK	HexNAc(4)Hex(5)NeuAc(2)	0.206	0.215
sp|P04114|APOB_HUMAN Apolipoprotein B-100 OS=Homo sapiens GN=APOB PE=1 SV=2	QVLFLDTVYGNCSTHFTVK	HexNAc(2)Hex(5)	0.00246
sp|P04275|VWF_HUMAN von Willebrand factor OS=Homo sapiens GN=VWF PE=1 SV=4	HCDGNVSSCGDHPSEGCFCPPDK	HexNAc(4)Hex(5)Fuc(1)NeuAc(1)	0.161
sp|P04278|SHBG_HUMAN Sex hormone-binding globulin OS=Homo sapiens GN=SHBG PE=1 SV=2	LDVDQALNR	HexNAc(4)Hex(5)NeuAc(2)	0.187	0.179
sp|P05155|IC1_HUMAN Plasma protease C1 inhibitor OS=Homo sapiens GN=SERPING1 PE=1 SV=2	DTFVNASR	HexNAc(4)Hex(5)Fuc(1)	0.0592	0.0888
sp|P05155|IC1_HUMAN Plasma protease C1 inhibitor OS=Homo sapiens GN=SERPING1 PE=1 SV=2	DTFVNASR	HexNAc(5)Hex(6)Fuc(1)NeuAc(3)	0.0737	0.189
sp|P05155|IC1_HUMAN Plasma protease C1 inhibitor OS=Homo sapiens GN=SERPING1 PE=1 SV=2	DTFVNASR	HexNAc(5)Hex(6)Fuc(1)NeuAc(2)		0.0917
sp|P05155|IC1_HUMAN Plasma protease C1 inhibitor OS=Homo sapiens GN=SERPING1 PE=1 SV=2	DTFVNASR	HexNAc(5)Hex(6)NeuAc(1)	0.129	0.0875
sp|P05155|IC1_HUMAN Plasma protease C1 inhibitor OS=Homo sapiens GN=SERPING1 PE=1 SV=2	DTFVNASR	HexNAc(3)Hex(4)NeuAc(1)	0.143	0.142
sp|P05155|IC1_HUMAN Plasma protease C1 inhibitor OS=Homo sapiens GN=SERPING1 PE=1 SV=2	DTFVNASR	HexNAc(5)Hex(6)Fuc(1)NeuAc(1)	0.283	0.373
sp|P05155|IC1_HUMAN Plasma protease C1 inhibitor OS=Homo sapiens GN=SERPING1 PE=1 SV=2	DTFVNASR	HexNAc(5)Hex(5)Fuc(1)	0.312	0.319
sp|P05155|IC1_HUMAN Plasma protease C1 inhibitor OS=Homo sapiens GN=SERPING1 PE=1 SV=2	DTFVNASR	HexNAc(5)Hex(6)NeuAc(3)	0.376	0.357
sp|P05155|IC1_HUMAN Plasma protease C1 inhibitor OS=Homo sapiens GN=SERPING1 PE=1 SV=2	DTFVNASR	HexNAc(4)Hex(5)NeuAc(1)	0.454	0.63
sp|P05155|IC1_HUMAN Plasma protease C1 inhibitor OS=Homo sapiens GN=SERPING1 PE=1 SV=2	DTFVNASR	HexNAc(4)Hex(5)Fuc(1)NeuAc(1)	0.469	0.436
sp|P05155|IC1_HUMAN Plasma protease C1 inhibitor OS=Homo sapiens GN=SERPING1 PE=1 SV=2	DTFVNASR	HexNAc(4)Hex(5)Fuc(1)NeuAc(2)	1.97	1.43
sp|P05155|IC1_HUMAN Plasma protease C1 inhibitor OS=Homo sapiens GN=SERPING1 PE=1 SV=2	DTFVNASR	HexNAc(4)Hex(5)NeuAc(2)	7.95	8.14
sp|P05156|CFAI_HUMAN Complement factor I OS=Homo sapiens GN=CFI PE=1 SV=2	NGTAVCATNR	HexNAc(3)Hex(4)NeuAc(1)	0.0304	0.0228
sp|P05156|CFAI_HUMAN Complement factor I OS=Homo sapiens GN=CFI PE=1 SV=2	NGTAVCATNR	HexNAc(4)Hex(5)Fuc(1)NeuAc(2)	0.0347	0.0869
sp|P05156|CFAI_HUMAN Complement factor I OS=Homo sapiens GN=CFI PE=1 SV=2	NGTAVCATNR	HexNAc(5)Hex(6)NeuAc(2)	0.0635	0.0617
sp|P05156|CFAI_HUMAN Complement factor I OS=Homo sapiens GN=CFI PE=1 SV=2	LISNCSK	HexNAc(3)Hex(4)NeuAc(1)		0.0816
sp|P05156|CFAI_HUMAN Complement factor I OS=Homo sapiens GN=CFI PE=1 SV=2	FLNNGTCTAEGK	HexNAc(4)Hex(5)Fuc(2)NeuAc(1)	1.44
sp|P05156|CFAI_HUMAN Complement factor I OS=Homo sapiens GN=CFI PE=1 SV=2	NGTAVCATNR	HexNAc(4)Hex(5)NeuAc(2)	2.42	2.53
sp|P05156|CFAI_HUMAN Complement factor I OS=Homo sapiens GN=CFI PE=1 SV=2	FLNNGTCTAEGK	HexNAc(4)Hex(5)NeuAc(2)	2.66	1.55
sp|P05156|CFAI_HUMAN Complement factor I OS=Homo sapiens GN=CFI PE=1 SV=2	LISNCSK	HexNAc(4)Hex(5)NeuAc(2)	3.61	3.91
sp|P05160|F13B_HUMAN Coagulation factor XIII B chain OS=Homo sapiens GN=F13B PE=1 SV=3	EHETCLAPELYNGNYSTTQK	HexNAc(4)Hex(5)NeuAc(2)	0.00134	0
sp|P05160|F13B_HUMAN Coagulation factor XIII B chain OS=Homo sapiens GN=F13B PE=1 SV=3	KEHETCLAPELYNGNYSTTQK	HexNAc(4)Hex(5)Fuc(2)NeuAc(1)		0.0132
sp|P05160|F13B_HUMAN Coagulation factor XIII B chain OS=Homo sapiens GN=F13B PE=1 SV=3	KEHETCLAPELYNGNYSTTQK	HexNAc(4)Hex(5)NeuAc(2)	0.0602	0.0692
sp|P05543|THBG_HUMAN Thyroxine-binding globulin OS=Homo sapiens GN=SERPINA7 PE=1 SV=2	VTACHSSQPNATLYK	HexNAc(4)Hex(5)Fuc(2)NeuAc(1)	0.125
sp|P05543|THBG_HUMAN Thyroxine-binding globulin OS=Homo sapiens GN=SERPINA7 PE=1 SV=2	VTACHSSQPNATLYK	HexNAc(4)Hex(5)NeuAc(2)		0.288
sp|P05546|HEP2_HUMAN Heparin cofactor 2 OS=Homo sapiens GN=SERPIND1 PE=1 SV=3	DFVNASSK	HexNAc(5)Hex(6)Fuc(1)NeuAc(3)	0.0409
sp|P05546|HEP2_HUMAN Heparin cofactor 2 OS=Homo sapiens GN=SERPIND1 PE=1 SV=3	DFVNASSK	HexNAc(5)Hex(6)NeuAc(3)	0.0657	0.0528
sp|P05546|HEP2_HUMAN Heparin cofactor 2 OS=Homo sapiens GN=SERPIND1 PE=1 SV=3	DFVNASSK	HexNAc(4)Hex(5)NeuAc(2)	3.21	3.61
sp|P06276|CHLE_HUMAN Cholinesterase OS=Homo sapiens GN=BCHE PE=1 SV=1	DNYTK	HexNAc(4)Hex(5)NeuAc(2)		0.015
sp|P06276|CHLE_HUMAN Cholinesterase OS=Homo sapiens GN=BCHE PE=1 SV=1	ENETEIIK	HexNAc(4)Hex(5)NeuAc(1)	0.0467	0.0953
sp|P06276|CHLE_HUMAN Cholinesterase OS=Homo sapiens GN=BCHE PE=1 SV=1	DNNSIITR	HexNAc(4)Hex(5)NeuAc(2)	0.179	0.249
sp|P06276|CHLE_HUMAN Cholinesterase OS=Homo sapiens GN=BCHE PE=1 SV=1	DNNSIITR	HexNAc(4)Hex(5)NeuAc(1)	0.298	0.344
sp|P07357|CO8A_HUMAN Complement component C8 alpha chain OS=Homo sapiens GN=C8A PE=1 SV=2	GGSSGWSGGLAQNR	HexNAc(4)Hex(5)NeuAc(2)	0.495	0.603
sp|P07996|TSP1_HUMAN Thrombospondin-1 OS=Homo sapiens GN=THBS1 PE=1 SV=2	VVNSTTGPGEHLR	HexNAc(4)Hex(5)NeuAc(1)	0.0475
sp|P07996|TSP1_HUMAN Thrombospondin-1 OS=Homo sapiens GN=THBS1 PE=1 SV=2	VVNSTTGPGEHLR	HexNAc(4)Hex(5)NeuAc(2)	0.234	0.0861
sp|P08603|CFAH_HUMAN Complement factor H OS=Homo sapiens GN=CFH PE=1 SV=4	ISEENETTCYMGK	HexNAc(5)Hex(6)NeuAc(3)		0.00616
sp|P08603|CFAH_HUMAN Complement factor H OS=Homo sapiens GN=CFH PE=1 SV=4	ISEENETTCYMGK	HexNAc(4)Hex(5)NeuAc(1)	0.0391	0.0526
sp|P08603|CFAH_HUMAN Complement factor H OS=Homo sapiens GN=CFH PE=1 SV=4	IPCSQPPQIEHGTINSSR	HexNAc(4)Hex(5)NeuAc(2)	0.0545	0.00834
sp|P08603|CFAH_HUMAN Complement factor H OS=Homo sapiens GN=CFH PE=1 SV=4	MDGASNVTCINSR	HexNAc(4)Hex(5)Fuc(1)NeuAc(1)	0.076	0.0864
sp|P08603|CFAH_HUMAN Complement factor H OS=Homo sapiens GN=CFH PE=1 SV=4	MDGASNVTCINSR	HexNAc(4)Hex(5)NeuAc(1)	0.11	0.252
sp|P08603|CFAH_HUMAN Complement factor H OS=Homo sapiens GN=CFH PE=1 SV=4	SPDVINGSPISQK	HexNAc(4)Hex(5)NeuAc(2)	0.142	0.137
sp|P08603|CFAH_HUMAN Complement factor H OS=Homo sapiens GN=CFH PE=1 SV=4	MDGASNVTCINSR	HexNAc(5)Hex(4)NeuAc(2)		0.417
sp|P08603|CFAH_HUMAN Complement factor H OS=Homo sapiens GN=CFH PE=1 SV=4	ISEENETTCYMGK	HexNAc(4)Hex(5)NeuAc(2)	0.667	0.54
sp|P08603|CFAH_HUMAN Complement factor H OS=Homo sapiens GN=CFH PE=1 SV=4	MDGASNVTCINSR	HexNAc(4)Hex(5)NeuAc(2)	2.63	2.32
sp|P0C0L5|CO4B_HUMAN Complement C4-B OS=Homo sapiens GN=C4B PE=1 SV=2	GLNVTLSSTGR	HexNAc(4)Hex(5)NeuAc(2)	0.151	0.251
sp|P10643|CO7_HUMAN Complement component C7 OS=Homo sapiens GN=C7 PE=1 SV=2	NYTLTGR	HexNAc(6)Hex(7)		0.014
sp|P10643|CO7_HUMAN Complement component C7 OS=Homo sapiens GN=C7 PE=1 SV=2	NYTLTGR	HexNAc(5)Hex(5)Fuc(1)	0.0204	0.0305
sp|P10643|CO7_HUMAN Complement component C7 OS=Homo sapiens GN=C7 PE=1 SV=2	NYTLTGR	HexNAc(5)Hex(5)Fuc(1)NeuAc(1)	0.0594	0.291
sp|P10643|CO7_HUMAN Complement component C7 OS=Homo sapiens GN=C7 PE=1 SV=2	NYTLTGR	HexNAc(5)Hex(5)Fuc(1)NeuAc(2)	0.0794	0.242
sp|P10643|CO7_HUMAN Complement component C7 OS=Homo sapiens GN=C7 PE=1 SV=2	NYTLTGR	HexNAc(4)Hex(5)Fuc(1)NeuAc(1)	0.685	0.393
sp|P10643|CO7_HUMAN Complement component C7 OS=Homo sapiens GN=C7 PE=1 SV=2	NYTLTGR	HexNAc(4)Hex(5)Fuc(1)NeuAc(2)	0.818	0.849
sp|P10909|CLUS_HUMAN Clusterin OS=Homo sapiens GN=CLU PE=1 SV=1	LANLTQGEDQYYLR	HexNAc(4)Hex(5)NeuAc(2)	0.00364
sp|P10909|CLUS_HUMAN Clusterin OS=Homo sapiens GN=CLU PE=1 SV=1	KEDALNETR	HexNAc(5)Hex(6)Fuc(1)NeuAc(3)		0.0777
sp|P10909|CLUS_HUMAN Clusterin OS=Homo sapiens GN=CLU PE=1 SV=1	KEDALNETR	HexNAc(4)Hex(5)NeuAc(2)		0.0856
sp|P10909|CLUS_HUMAN Clusterin OS=Homo sapiens GN=CLU PE=1 SV=1	KEDALNETR	HexNAc(5)Hex(6)NeuAc(3)	0.132	0.113
sp|P10909|CLUS_HUMAN Clusterin OS=Homo sapiens GN=CLU PE=1 SV=1	EDALNETR	HexNAc(5)Hex(6)Fuc(1)NeuAc(3)	0.162	0.15
sp|P10909|CLUS_HUMAN Clusterin OS=Homo sapiens GN=CLU PE=1 SV=1	KKEDALNETR	HexNAc(5)Hex(6)Fuc(1)NeuAc(3)	0.231	0.212
sp|P10909|CLUS_HUMAN Clusterin OS=Homo sapiens GN=CLU PE=1 SV=1	EDALNETR	HexNAc(5)Hex(6)NeuAc(3)	0.313	0.229
sp|P10909|CLUS_HUMAN Clusterin OS=Homo sapiens GN=CLU PE=1 SV=1	KKEDALNETR	HexNAc(5)Hex(6)NeuAc(3)		1.9
sp|P12259|FA5_HUMAN Coagulation factor V OS=Homo sapiens GN=F5 PE=1 SV=4	NNTMIR	HexNAc(4)Hex(5)NeuAc(2)	0.0874	0.15
sp|P20742|PZP_HUMAN Pregnancy zone protein OS=Homo sapiens GN=PZP PE=1 SV=4	VNITVCGEYTYGK	HexNAc(5)Hex(5)Fuc(1)NeuAc(2)	0.0157
sp|P20742|PZP_HUMAN Pregnancy zone protein OS=Homo sapiens GN=PZP PE=1 SV=4	VNITVCGEYTYGK	HexNAc(5)Hex(5)NeuAc(2)	0.0594
sp|P20851|C4BPB_HUMAN C4b-binding protein beta chain OS=Homo sapiens GN=C4BPB PE=1 SV=1	TLFCNASK	HexNAc(4)Hex(5)NeuAc(2)	0.034
sp|P22792|CPN2_HUMAN Carboxypeptidase N subunit 2 OS=Homo sapiens GN=CPN2 PE=1 SV=3	AFGSNPNLTK	HexNAc(5)Hex(6)NeuAc(2)	0.0827
sp|P22792|CPN2_HUMAN Carboxypeptidase N subunit 2 OS=Homo sapiens GN=CPN2 PE=1 SV=3	AFGSNPNLTK	HexNAc(5)Hex(6)Fuc(1)NeuAc(3)	0.209	0.21
sp|P22792|CPN2_HUMAN Carboxypeptidase N subunit 2 OS=Homo sapiens GN=CPN2 PE=1 SV=3	AFGSNPNLTK	HexNAc(5)Hex(6)NeuAc(3)	0.353	0.364
sp|P22792|CPN2_HUMAN Carboxypeptidase N subunit 2 OS=Homo sapiens GN=CPN2 PE=1 SV=3	AFGSNPNLTK	HexNAc(4)Hex(5)NeuAc(2)	0.741	0.728
sp|P22891|PROZ_HUMAN Vitamin K-dependent protein Z OS=Homo sapiens GN=PROZ PE=1 SV=2	NGTDLGNSLTTR	HexNAc(4)Hex(5)NeuAc(2)	0.0513
sp|P22891|PROZ_HUMAN Vitamin K-dependent protein Z OS=Homo sapiens GN=PROZ PE=1 SV=2	NITVK	HexNAc(4)Hex(5)NeuAc(2)	0.34	0.314
sp|P23142|FBLN1_HUMAN Fibulin-1 OS=Homo sapiens GN=FBLN1 PE=1 SV=4	CATPHGDNASLEATFVK	HexNAc(4)Hex(5)Fuc(1)NeuAc(2)		0.0165
sp|P26927|HGFL_HUMAN Hepatocyte growth factor-like protein OS=Homo sapiens GN=MST1 PE=1 SV=2	GTANTTTAGVPCQR	HexNAc(4)Hex(5)NeuAc(2)	0.149	0.154
sp|P36980|FHR2_HUMAN Complement factor H-related protein 2 OS=Homo sapiens GN=CFHR2 PE=1 SV=1	LQNNENNISCVER	HexNAc(4)Hex(5)NeuAc(2)	0.0629
sp|P43251|BTD_HUMAN Biotinidase OS=Homo sapiens GN=BTD PE=1 SV=2	FNDTEVLQR	HexNAc(5)Hex(6)NeuAc(3)	0.00212
sp|P43251|BTD_HUMAN Biotinidase OS=Homo sapiens GN=BTD PE=1 SV=2	NPVGLIGAENATGETDPSHSK	HexNAc(7)Hex(8)NeuAc(1)	0.00286
sp|P43251|BTD_HUMAN Biotinidase OS=Homo sapiens GN=BTD PE=1 SV=2	NPVGLIGAENATGETDPSHSK	HexNAc(4)Hex(5)Fuc(1)NeuAc(2)	0.0136	0.0129
sp|P43251|BTD_HUMAN Biotinidase OS=Homo sapiens GN=BTD PE=1 SV=2	FNDTEVLQR	HexNAc(4)Hex(5)Fuc(1)NeuAc(2)		0.0257
sp|P43251|BTD_HUMAN Biotinidase OS=Homo sapiens GN=BTD PE=1 SV=2	NPVGLIGAENATGETDPSHSK	HexNAc(5)Hex(6)Fuc(1)NeuAc(3)	0.0293
sp|P43251|BTD_HUMAN Biotinidase OS=Homo sapiens GN=BTD PE=1 SV=2	NPVGLIGAENATGETDPSHSK	HexNAc(4)Hex(5)NeuAc(2)	0.0307	0.0449
sp|P43251|BTD_HUMAN Biotinidase OS=Homo sapiens GN=BTD PE=1 SV=2	NPVGLIGAENATGETDPSHSK	HexNAc(5)Hex(6)NeuAc(3)	0.0317	0.0423
sp|P43251|BTD_HUMAN Biotinidase OS=Homo sapiens GN=BTD PE=1 SV=2	FNDTEVLQR	HexNAc(4)Hex(5)NeuAc(2)	0.193	0.135
sp|P43652|AFAM_HUMAN Afamin OS=Homo sapiens GN=AFM PE=1 SV=1	DIENFNSTQK	HexNAc(4)Hex(5)NeuAc(1)		0.00905
sp|P43652|AFAM_HUMAN Afamin OS=Homo sapiens GN=AFM PE=1 SV=1	YAEDKFNETTEK	HexNAc(4)Hex(6)NeuAc(1)	0.00981
sp|P43652|AFAM_HUMAN Afamin OS=Homo sapiens GN=AFM PE=1 SV=1	DIENFNSTQK	HexNAc(5)Hex(6)NeuAc(3)	0.0134	0.00968
sp|P43652|AFAM_HUMAN Afamin OS=Homo sapiens GN=AFM PE=1 SV=1	YAEDKFNETTEK	HexNAc(4)Hex(5)Fuc(1)NeuAc(1)	0.0328
sp|P43652|AFAM_HUMAN Afamin OS=Homo sapiens GN=AFM PE=1 SV=1	YAEDKFNETTEK	HexNAc(5)Hex(6)NeuAc(3)	0.0332	0.087
sp|P43652|AFAM_HUMAN Afamin OS=Homo sapiens GN=AFM PE=1 SV=1	DIENFNSTQK	HexNAc(3)Hex(4)NeuAc(1)	0.0475	0.0434
sp|P43652|AFAM_HUMAN Afamin OS=Homo sapiens GN=AFM PE=1 SV=1	YAEDKFNETTEK	HexNAc(5)Hex(6)Fuc(2)NeuAc(2)		0.0528
sp|P43652|AFAM_HUMAN Afamin OS=Homo sapiens GN=AFM PE=1 SV=1	YAEDKFNETTEK	HexNAc(4)Hex(5)NeuAc(1)		0.0968
sp|P43652|AFAM_HUMAN Afamin OS=Homo sapiens GN=AFM PE=1 SV=1	DIENFNSTQK	HexNAc(4)Hex(5)Fuc(1)NeuAc(2)	0.256	0.254
sp|P43652|AFAM_HUMAN Afamin OS=Homo sapiens GN=AFM PE=1 SV=1	DIENFNSTQK	HexNAc(4)Hex(5)Fuc(2)NeuAc(1)	0.433	0.000538
sp|P43652|AFAM_HUMAN Afamin OS=Homo sapiens GN=AFM PE=1 SV=1	FNETTEK	HexNAc(4)Hex(5)NeuAc(2)	1.12	1.1
sp|P43652|AFAM_HUMAN Afamin OS=Homo sapiens GN=AFM PE=1 SV=1	YAEDKFNETTEK	HexNAc(4)Hex(5)NeuAc(2)	1.68	1.71
sp|P43652|AFAM_HUMAN Afamin OS=Homo sapiens GN=AFM PE=1 SV=1	DIENFNSTQK	HexNAc(4)Hex(5)NeuAc(2)	4.88	7.21
sp|P48740|MASP1_HUMAN Mannan-binding lectin serine protease 1 OS=Homo sapiens GN=MASP1 PE=1 SV=3	NNLTTYK	HexNAc(4)Hex(5)NeuAc(2)	0.0387
sp|P48740|MASP1_HUMAN Mannan-binding lectin serine protease 1 OS=Homo sapiens GN=MASP1 PE=1 SV=3	NNLTTYK	HexNAc(4)Hex(5)Fuc(1)NeuAc(1)	0.0542	0.104
sp|P49747|COMP_HUMAN Cartilage oligomeric matrix protein OS=Homo sapiens GN=COMP PE=1 SV=2	CNDTIPEDYETHQLR	HexNAc(2)Hex(9)	0.0875	0.0498
sp|P49908|SEPP1_HUMAN Selenoprotein P OS=Homo sapiens GN=SELENOP PE=1 SV=3	KCGNCSLTTLK	HexNAc(4)Hex(5)NeuAc(2)		0.0479
sp|P49908|SEPP1_HUMAN Selenoprotein P OS=Homo sapiens GN=SELENOP PE=1 SV=3	CGNCSLTTLK	HexNAc(4)Hex(5)NeuAc(2)		0.123
sp|P55056|APOC4_HUMAN Apolipoprotein C-IV OS=Homo sapiens GN=APOC4 PE=1 SV=1	ELLETVVNR	HexNAc(4)Hex(5)NeuAc(2)	0.00244	0.00485
sp|P55058|PLTP_HUMAN Phospholipid transfer protein OS=Homo sapiens GN=PLTP PE=1 SV=1	VSNVSCQASVSR	HexNAc(4)Hex(5)Fuc(1)NeuAc(1)	0.104	0.082
sp|P55285|CADH6_HUMAN Cadherin-6 OS=Homo sapiens GN=CDH6 PE=1 SV=1	NELNR	HexNAc(4)Hex(5)NeuAc(2)		0.157
sp|Q06033|ITIH3_HUMAN Inter-alpha-trypsin inhibitor heavy chain H3 OS=Homo sapiens GN=ITIH3 PE=1 SV=2	NAHGEEKENLTAR	HexNAc(5)Hex(6)NeuAc(3)	0.0271	0.312
sp|Q06033|ITIH3_HUMAN Inter-alpha-trypsin inhibitor heavy chain H3 OS=Homo sapiens GN=ITIH3 PE=1 SV=2	ENLTAR	HexNAc(4)Hex(5)NeuAc(2)	0.0958	0.686
sp|Q06033|ITIH3_HUMAN Inter-alpha-trypsin inhibitor heavy chain H3 OS=Homo sapiens GN=ITIH3 PE=1 SV=2	NAHGEEKENLTAR	HexNAc(5)Hex(6)Fuc(1)NeuAc(3)	0.242
sp|Q16610|ECM1_HUMAN Extracellular matrix protein 1 OS=Homo sapiens GN=ECM1 PE=1 SV=2	QGNNHTCTWK	HexNAc(4)Hex(5)Fuc(1)NeuAc(2)		0.0336
sp|Q68BL7|OLM2A_HUMAN Olfactomedin-like protein 2A OS=Homo sapiens GN=OLFML2A PE=2 SV=1	ANLSR	HexNAc(6)Hex(7)Fuc(1)NeuAc(4)		0.0144
sp|Q6EMK4|VASN_HUMAN Vasorin OS=Homo sapiens GN=VASN PE=1 SV=1	LHEITNETFR	HexNAc(4)Hex(5)Fuc(1)NeuAc(2)	0.0468	0.0352
sp|Q86VB7|C163A_HUMAN Scavenger receptor cysteine-rich type 1 protein M130 OS=Homo sapiens GN=CD163 PE=1 SV=2	APGWANSSAGSGR	HexNAc(4)Hex(5)Fuc(1)NeuAc(1)		0.0354
sp|Q86VB7|C163A_HUMAN Scavenger receptor cysteine-rich type 1 protein M130 OS=Homo sapiens GN=CD163 PE=1 SV=2	GNESALWDCK	HexNAc(4)Hex(5)Fuc(1)NeuAc(1)	0.0864	0.0474
sp|Q96PD5|PGRP2_HUMAN N-acetylmuramoyl-L-alanine amidase OS=Homo sapiens GN=PGLYRP2 PE=1 SV=1	GFGVAIVGNYTAALPTEAALR	HexNAc(4)Hex(5)NeuAc(2)	0.000626
sp|Q9BXR6|FHR5_HUMAN Complement factor H-related protein 5 OS=Homo sapiens GN=CFHR5 PE=1 SV=1	NISCVER	HexNAc(4)Hex(5)NeuAc(2)		0.0254
sp|Q9NZP8|C1RL_HUMAN Complement C1r subcomponent-like protein OS=Homo sapiens GN=C1RL PE=1 SV=2	TQPSSENK	HexNAc(4)Hex(5)Fuc(2)NeuAc(1)	0.0122
sp|Q9Y5Y7|LYVE1_HUMAN Lymphatic vessel endothelial hyaluronic acid receptor 1 OS=Homo sapiens GN=LYVE1 PE=1 SV=2	ANQQLNFTEAK	HexNAc(4)Hex(5)NeuAc(1)		0.0109
sp|Q9Y5Y7|LYVE1_HUMAN Lymphatic vessel endothelial hyaluronic acid receptor 1 OS=Homo sapiens GN=LYVE1 PE=1 SV=2	KANQQLNFTEAK	HexNAc(4)Hex(5)NeuAc(1)		0.0342
sp|Q9Y5Y7|LYVE1_HUMAN Lymphatic vessel endothelial hyaluronic acid receptor 1 OS=Homo sapiens GN=LYVE1 PE=1 SV=2	KANQQLNFTEAK	HexNAc(5)Hex(6)NeuAc(2)		0.0731
sp|Q9Y5Y7|LYVE1_HUMAN Lymphatic vessel endothelial hyaluronic acid receptor 1 OS=Homo sapiens GN=LYVE1 PE=1 SV=2	KANQQLNFTEAK	HexNAc(5)Hex(6)Fuc(2)NeuAc(1)	0.0837
sp|Q9Y5Y7|LYVE1_HUMAN Lymphatic vessel endothelial hyaluronic acid receptor 1 OS=Homo sapiens GN=LYVE1 PE=1 SV=2	ANQQLNFTEAK	HexNAc(5)Hex(6)NeuAc(2)	0.0913	0.162
sp|Q9Y5Y7|LYVE1_HUMAN Lymphatic vessel endothelial hyaluronic acid receptor 1 OS=Homo sapiens GN=LYVE1 PE=1 SV=2	KANQQLNFTEAK	HexNAc(5)Hex(6)NeuAc(1)	0.158	0.214
Note: the numbers from column D and E correspond to the percentage of the indivdual glyopeptides from the whole column (one injection).

## Sheet: Fraction3
Table S2. N-glycopeptides identified in each fraction in the pooled cirrhosis samples
Fraction 3
			Cirrhosis_Fc3r1(%)	Cirrhosis_Fc3r2(%)
Protein\nname	Sequence\n(unformatted)	Glycans
sp|O75882|ATRN_HUMAN Attractin OS=Homo sapiens GN=ATRN PE=1 SV=2	DLDMFINASK	HexNAc(4)Hex(5)NeuAc(2)	0.00982
sp|O75882|ATRN_HUMAN Attractin OS=Homo sapiens GN=ATRN PE=1 SV=2	EWLPLNR	HexNAc(3)Hex(4)NeuAc(1)	0.0225
sp|O75882|ATRN_HUMAN Attractin OS=Homo sapiens GN=ATRN PE=1 SV=2	EWLPLNR	HexNAc(4)Hex(5)Fuc(1)NeuAc(2)	0.0395
sp|O75882|ATRN_HUMAN Attractin OS=Homo sapiens GN=ATRN PE=1 SV=2	IDSTGNVTNELR	HexNAc(2)Hex(5)		0.0515
sp|O75882|ATRN_HUMAN Attractin OS=Homo sapiens GN=ATRN PE=1 SV=2	NHSCSEGQISIFR	HexNAc(4)Hex(5)Fuc(1)NeuAc(1)	0.14
sp|O75882|ATRN_HUMAN Attractin OS=Homo sapiens GN=ATRN PE=1 SV=2	NHSCSEGQISIFR	HexNAc(4)Hex(5)Fuc(1)NeuAc(2)	0.153	0.167
sp|O75882|ATRN_HUMAN Attractin OS=Homo sapiens GN=ATRN PE=1 SV=2	EWLPLNR	HexNAc(4)Hex(5)NeuAc(2)	0.586	0.373
sp|O75882|ATRN_HUMAN Attractin OS=Homo sapiens GN=ATRN PE=1 SV=2	NHSCSEGQISIFR	HexNAc(4)Hex(5)NeuAc(2)		1.35
sp|P00450|CERU_HUMAN Ceruloplasmin OS=Homo sapiens GN=CP PE=1 SV=1	EHEGAIYPDNTTDFQR	HexNAc(7)Hex(8)NeuAc(1)
sp|P00450|CERU_HUMAN Ceruloplasmin OS=Homo sapiens GN=CP PE=1 SV=1	ELHHLQEQNVSNAFLDK	HexNAc(4)Hex(5)Fuc(1)NeuAc(1)	0.0132
sp|P00450|CERU_HUMAN Ceruloplasmin OS=Homo sapiens GN=CP PE=1 SV=1	ELHHLQEQNVSNAFLDK	HexNAc(5)Hex(9)Fuc(1)
sp|P00450|CERU_HUMAN Ceruloplasmin OS=Homo sapiens GN=CP PE=1 SV=1	ENLTAPGSDSAVFFEQGTTR	HexNAc(4)Hex(5)Fuc(2)NeuAc(1)		0.067
sp|P00450|CERU_HUMAN Ceruloplasmin OS=Homo sapiens GN=CP PE=1 SV=1	ELHHLQEQNVSNAFLDK	HexNAc(5)Hex(6)NeuAc(2)		0.114
sp|P00450|CERU_HUMAN Ceruloplasmin OS=Homo sapiens GN=CP PE=1 SV=1	ELHHLQEQNVSNAFLDK	HexNAc(3)Hex(4)Fuc(1)NeuAc(1)	0.0507
sp|P00450|CERU_HUMAN Ceruloplasmin OS=Homo sapiens GN=CP PE=1 SV=1	EHEGAIYPDNTTDFQR	HexNAc(4)Hex(5)NeuAc(2)	0.427	0.119
sp|P00450|CERU_HUMAN Ceruloplasmin OS=Homo sapiens GN=CP PE=1 SV=1	ENLTAPGSDSAVFFEQGTTR	HexNAc(4)Hex(5)Fuc(1)NeuAc(2)	0.0142	0.0205
sp|P00450|CERU_HUMAN Ceruloplasmin OS=Homo sapiens GN=CP PE=1 SV=1	ELHHLQEQNVSNAFLDK	HexNAc(3)Hex(4)NeuAc(1)	0.144	0.18
sp|P00450|CERU_HUMAN Ceruloplasmin OS=Homo sapiens GN=CP PE=1 SV=1	EHEGAIYPDNTTDFQR	HexNAc(4)Hex(5)Fuc(1)NeuAc(2)		0.0717
sp|P00450|CERU_HUMAN Ceruloplasmin OS=Homo sapiens GN=CP PE=1 SV=1	ELHHLQEQNVSNAFLDK	HexNAc(4)Hex(5)NeuAc(1)	0.33	0.281
sp|P00450|CERU_HUMAN Ceruloplasmin OS=Homo sapiens GN=CP PE=1 SV=1	ELHHLQEQNVSNAFLDK	HexNAc(5)Hex(6)Fuc(1)NeuAc(2)		0.257
sp|P00450|CERU_HUMAN Ceruloplasmin OS=Homo sapiens GN=CP PE=1 SV=1	ELHHLQEQNVSNAFLDK	HexNAc(5)Hex(6)Fuc(2)NeuAc(3)	0.64	0.626
sp|P00450|CERU_HUMAN Ceruloplasmin OS=Homo sapiens GN=CP PE=1 SV=1	ENLTAPGSDSAVFFEQGTTR	HexNAc(4)Hex(5)NeuAc(2)	0.166	0.17
sp|P00450|CERU_HUMAN Ceruloplasmin OS=Homo sapiens GN=CP PE=1 SV=1	ELHHLQEQNVSNAFLDK	HexNAc(4)Hex(5)Fuc(1)NeuAc(2)	6.48	21.3
sp|P00450|CERU_HUMAN Ceruloplasmin OS=Homo sapiens GN=CP PE=1 SV=1	ELHHLQEQNVSNAFLDK	HexNAc(5)Hex(6)NeuAc(3)	2.61	2.91
sp|P00450|CERU_HUMAN Ceruloplasmin OS=Homo sapiens GN=CP PE=1 SV=1	ELHHLQEQNVSNAFLDK	HexNAc(5)Hex(6)Fuc(1)NeuAc(3)	2.64	2.78
sp|P00450|CERU_HUMAN Ceruloplasmin OS=Homo sapiens GN=CP PE=1 SV=1	ELHHLQEQNVSNAFLDK	HexNAc(4)Hex(5)NeuAc(2)	33.3	20.3
sp|P00734|THRB_HUMAN Prothrombin OS=Homo sapiens GN=F2 PE=1 SV=2	GHVNITR	HexNAc(4)Hex(5)NeuAc(1)
sp|P00734|THRB_HUMAN Prothrombin OS=Homo sapiens GN=F2 PE=1 SV=2	NFTENDLLVR	HexNAc(4)Hex(5)NeuAc(1)		0.0368
sp|P00734|THRB_HUMAN Prothrombin OS=Homo sapiens GN=F2 PE=1 SV=2	NFTENDLLVR	HexNAc(4)Hex(5)NeuAc(2)	0.0544	0.0777
sp|P00734|THRB_HUMAN Prothrombin OS=Homo sapiens GN=F2 PE=1 SV=2	GHVNITR	HexNAc(4)Hex(5)NeuAc(2)	0.556	0.206
sp|P00734|THRB_HUMAN Prothrombin OS=Homo sapiens GN=F2 PE=1 SV=2	YPHKPEINSTTHPGADLQENFCR	HexNAc(4)Hex(5)NeuAc(2)		0.961
sp|P00748|FA12_HUMAN Coagulation factor XII OS=Homo sapiens GN=F12 PE=1 SV=3	NVTAEQAR	HexNAc(4)Hex(5)NeuAc(2)		0.113
sp|P01008|ANT3_HUMAN Antithrombin-III OS=Homo sapiens GN=SERPINC1 PE=1 SV=1	WVSNK	HexNAc(3)Hex(4)NeuAc(1)		0.00988
sp|P01008|ANT3_HUMAN Antithrombin-III OS=Homo sapiens GN=SERPINC1 PE=1 SV=1	WVSNK	HexNAc(4)Hex(5)NeuAc(2)		0.0281
sp|P01031|CO5_HUMAN Complement C5 OS=Homo sapiens GN=C5 PE=1 SV=4	YNFSFR	HexNAc(4)Hex(5)NeuAc(2)	0.0474
sp|P01042|KNG1_HUMAN Kininogen-1 OS=Homo sapiens GN=KNG1 PE=1 SV=2	YNSQNQSNNQFVLYR	HexNAc(5)Hex(6)Fuc(1)NeuAc(3)	0.00164	0.00532
sp|P01042|KNG1_HUMAN Kininogen-1 OS=Homo sapiens GN=KNG1 PE=1 SV=2	YNSQNQSNNQFVLYR	HexNAc(5)Hex(6)NeuAc(3)	0.012	0.0118
sp|P01042|KNG1_HUMAN Kininogen-1 OS=Homo sapiens GN=KNG1 PE=1 SV=2	ITYSIVQTNCSK	HexNAc(5)Hex(6)NeuAc(2)		0.0245
sp|P01042|KNG1_HUMAN Kininogen-1 OS=Homo sapiens GN=KNG1 PE=1 SV=2	ITYSIVQTNCSK	HexNAc(4)Hex(5)Fuc(1)NeuAc(2)	0.113	0.11
sp|P01042|KNG1_HUMAN Kininogen-1 OS=Homo sapiens GN=KNG1 PE=1 SV=2	ITYSIVQTNCSK	HexNAc(5)Hex(6)Fuc(1)NeuAc(2)		0.124
sp|P01042|KNG1_HUMAN Kininogen-1 OS=Homo sapiens GN=KNG1 PE=1 SV=2	ITYSIVQTNCSK	HexNAc(5)Hex(6)Fuc(1)NeuAc(3)	1.37	2.04
sp|P01042|KNG1_HUMAN Kininogen-1 OS=Homo sapiens GN=KNG1 PE=1 SV=2	YNSQNQSNNQFVLYR	HexNAc(4)Hex(5)Fuc(1)NeuAc(2)	0.0698	0.02
sp|P01042|KNG1_HUMAN Kininogen-1 OS=Homo sapiens GN=KNG1 PE=1 SV=2	ITYSIVQTNCSK	HexNAc(7)Hex(8)NeuAc(1)		0.663
sp|P01042|KNG1_HUMAN Kininogen-1 OS=Homo sapiens GN=KNG1 PE=1 SV=2	ITYSIVQTNCSK	HexNAc(4)Hex(5)NeuAc(2)	1.03	2
sp|P01042|KNG1_HUMAN Kininogen-1 OS=Homo sapiens GN=KNG1 PE=1 SV=2	YNSQNQSNNQFVLYR	HexNAc(4)Hex(5)NeuAc(2)	0.241	0.357
sp|P01042|KNG1_HUMAN Kininogen-1 OS=Homo sapiens GN=KNG1 PE=1 SV=2	ITYSIVQTNCSK	HexNAc(5)Hex(6)NeuAc(3)	2.41	2.02
sp|P01877|IGHA2_HUMAN Ig alpha-2 chain C region OS=Homo sapiens GN=IGHA2 PE=1 SV=3	TPLTANITK	HexNAc(5)Hex(3)Fuc(1)		0.00675
sp|P01877|IGHA2_HUMAN Ig alpha-2 chain C region OS=Homo sapiens GN=IGHA2 PE=1 SV=3	TPLTANITK	HexNAc(4)Hex(4)Fuc(1)
sp|P01877|IGHA2_HUMAN Ig alpha-2 chain C region OS=Homo sapiens GN=IGHA2 PE=1 SV=3	TPLTANITK	HexNAc(5)Hex(5)Fuc(1)NeuAc(1)	0.975	0.832
sp|P01877|IGHA2_HUMAN Ig alpha-2 chain C region OS=Homo sapiens GN=IGHA2 PE=1 SV=3	TPLTANITK	HexNAc(5)Hex(4)Fuc(1)NeuAc(1)	0.0117	0.0568
sp|P01877|IGHA2_HUMAN Ig alpha-2 chain C region OS=Homo sapiens GN=IGHA2 PE=1 SV=3	TPLTANITK	HexNAc(5)Hex(5)Fuc(1)	0.348	0.267
sp|P01877|IGHA2_HUMAN Ig alpha-2 chain C region OS=Homo sapiens GN=IGHA2 PE=1 SV=3	TPLTANITK	HexNAc(4)Hex(5)Fuc(1)NeuAc(1)	0.737	0.405
sp|P01877|IGHA2_HUMAN Ig alpha-2 chain C region OS=Homo sapiens GN=IGHA2 PE=1 SV=3	TPLTANITK	HexNAc(5)Hex(4)Fuc(1)	0.418	0.329
sp|P02749|APOH_HUMAN Beta-2-glycoprotein 1 OS=Homo sapiens GN=APOH PE=1 SV=3	LGNWSAMPSCK	HexNAc(4)Hex(5)NeuAc(2)		0.112
sp|P02749|APOH_HUMAN Beta-2-glycoprotein 1 OS=Homo sapiens GN=APOH PE=1 SV=3	VYKPSAGNNSLYR	HexNAc(4)Hex(5)Fuc(1)NeuAc(2)	0.174	2.05
sp|P02749|APOH_HUMAN Beta-2-glycoprotein 1 OS=Homo sapiens GN=APOH PE=1 SV=3	VYKPSAGNNSLYR	HexNAc(4)Hex(5)NeuAc(1)		0.179
sp|P02749|APOH_HUMAN Beta-2-glycoprotein 1 OS=Homo sapiens GN=APOH PE=1 SV=3	VYKPSAGNNSLYR	HexNAc(5)Hex(6)Fuc(1)NeuAc(3)	1.57
sp|P02749|APOH_HUMAN Beta-2-glycoprotein 1 OS=Homo sapiens GN=APOH PE=1 SV=3	VYKPSAGNNSLYR	HexNAc(4)Hex(5)NeuAc(2)	6.39	5.03
sp|P02750|A2GL_HUMAN Leucine-rich alpha-2-glycoprotein OS=Homo sapiens GN=LRG1 PE=1 SV=2	KLPPGLLANFTLLR	HexNAc(4)Hex(5)NeuAc(2)	0.0755
sp|P02751|FINC_HUMAN Fibronectin OS=Homo sapiens GN=FN1 PE=1 SV=4	HEEGHMLNCTCFGQGR	HexNAc(4)Hex(5)NeuAc(1)	0.203	0.0807
sp|P02751|FINC_HUMAN Fibronectin OS=Homo sapiens GN=FN1 PE=1 SV=4	HEEGHMLNCTCFGQGR	HexNAc(4)Hex(5)NeuAc(2)	0.253	0.079
sp|P02765|FETUA_HUMAN Alpha-2-HS-glycoprotein OS=Homo sapiens GN=AHSG PE=1 SV=1	VCQDCPLLAPLNDTR	HexNAc(1)	0.0152
sp|P02765|FETUA_HUMAN Alpha-2-HS-glycoprotein OS=Homo sapiens GN=AHSG PE=1 SV=1	KVCQDCPLLAPLNDTR	HexNAc(5)Hex(6)NeuAc(3)		0.0162
sp|P02765|FETUA_HUMAN Alpha-2-HS-glycoprotein OS=Homo sapiens GN=AHSG PE=1 SV=1	VCQDCPLLAPLNDTR	HexNAc(5)Hex(9)Fuc(1)	0.0196
sp|P02765|FETUA_HUMAN Alpha-2-HS-glycoprotein OS=Homo sapiens GN=AHSG PE=1 SV=1	VCQDCPLLAPLNDTR	HexNAc(5)Hex(6)NeuAc(2)	0.0244	0.0173
sp|P02765|FETUA_HUMAN Alpha-2-HS-glycoprotein OS=Homo sapiens GN=AHSG PE=1 SV=1	KVCQDCPLLAPLNDTR	HexNAc(5)Hex(6)Fuc(1)NeuAc(3)
sp|P02765|FETUA_HUMAN Alpha-2-HS-glycoprotein OS=Homo sapiens GN=AHSG PE=1 SV=1	VCQDCPLLAPLNDTR	HexNAc(5)Hex(6)Fuc(1)NeuAc(2)	0.0233	0.0219
sp|P02765|FETUA_HUMAN Alpha-2-HS-glycoprotein OS=Homo sapiens GN=AHSG PE=1 SV=1	VCQDCPLLAPLNDTR	HexNAc(4)Hex(5)Fuc(2)NeuAc(1)	0.0985
sp|P02765|FETUA_HUMAN Alpha-2-HS-glycoprotein OS=Homo sapiens GN=AHSG PE=1 SV=1	VCQDCPLLAPLNDTR	HexNAc(3)Hex(4)NeuAc(1)	0.079	0.0611
sp|P02765|FETUA_HUMAN Alpha-2-HS-glycoprotein OS=Homo sapiens GN=AHSG PE=1 SV=1	VCQDCPLLAPLNDTR	HexNAc(4)Hex(5)NeuAc(1)	0.0754	0.105
sp|P02765|FETUA_HUMAN Alpha-2-HS-glycoprotein OS=Homo sapiens GN=AHSG PE=1 SV=1	VCQDCPLLAPLNDTR	HexNAc(5)Hex(6)Fuc(1)NeuAc(3)		0.0578
sp|P02765|FETUA_HUMAN Alpha-2-HS-glycoprotein OS=Homo sapiens GN=AHSG PE=1 SV=1	VCQDCPLLAPLNDTR	HexNAc(5)Hex(6)NeuAc(3)	0.0237	0.0819
sp|P02765|FETUA_HUMAN Alpha-2-HS-glycoprotein OS=Homo sapiens GN=AHSG PE=1 SV=1	VCQDCPLLAPLNDTR	HexNAc(4)Hex(5)Fuc(1)NeuAc(2)	0.308	0.318
sp|P02765|FETUA_HUMAN Alpha-2-HS-glycoprotein OS=Homo sapiens GN=AHSG PE=1 SV=1	VCQDCPLLAPLNDTR	HexNAc(2)Hex(12)		1.13
sp|P02765|FETUA_HUMAN Alpha-2-HS-glycoprotein OS=Homo sapiens GN=AHSG PE=1 SV=1	VCQDCPLLAPLNDTR	HexNAc(4)Hex(5)NeuAc(2)	6.49	6.37
sp|P02765|FETUA_HUMAN Alpha-2-HS-glycoprotein OS=Homo sapiens GN=AHSG PE=1 SV=1	KVCQDCPLLAPLNDTR	HexNAc(4)Hex(5)NeuAc(2)	0.89
sp|P02787|TRFE_HUMAN Serotransferrin OS=Homo sapiens GN=TF PE=1 SV=3	CGLVPVLAENYNK	HexNAc(5)Hex(6)Fuc(1)NeuAc(2)	0.00421
sp|P02787|TRFE_HUMAN Serotransferrin OS=Homo sapiens GN=TF PE=1 SV=3	CGLVPVLAENYNK	HexNAc(3)Hex(4)NeuAc(1)	0.0279	0.0208
sp|P02787|TRFE_HUMAN Serotransferrin OS=Homo sapiens GN=TF PE=1 SV=3	CGLVPVLAENYNK	HexNAc(4)Hex(5)Fuc(1)NeuAc(2)	0.0263
sp|P02787|TRFE_HUMAN Serotransferrin OS=Homo sapiens GN=TF PE=1 SV=3	CGLVPVLAENYNK	HexNAc(5)Hex(6)NeuAc(1)		0.0787
sp|P02787|TRFE_HUMAN Serotransferrin OS=Homo sapiens GN=TF PE=1 SV=3	CGLVPVLAENYNK	HexNAc(4)Hex(5)NeuAc(1)	0.105	0.0707
sp|P02787|TRFE_HUMAN Serotransferrin OS=Homo sapiens GN=TF PE=1 SV=3	CGLVPVLAENYNK	HexNAc(5)Hex(6)NeuAc(2)	0.0715	0.0895
sp|P02787|TRFE_HUMAN Serotransferrin OS=Homo sapiens GN=TF PE=1 SV=3	CGLVPVLAENYNK	HexNAc(4)Hex(5)NeuAc(2)	2.65	1.59
sp|P02790|HEMO_HUMAN Hemopexin OS=Homo sapiens GN=HPX PE=1 SV=2	SWPAVGNCSSALR	HexNAc(3)Hex(4)NeuAc(1)	0.0215
sp|P02790|HEMO_HUMAN Hemopexin OS=Homo sapiens GN=HPX PE=1 SV=2	SWPAVGNCSSALR	HexNAc(5)Hex(6)Fuc(3)NeuAc(1)		0.0887
sp|P02790|HEMO_HUMAN Hemopexin OS=Homo sapiens GN=HPX PE=1 SV=2	SWPAVGNCSSALR	HexNAc(5)Hex(6)NeuAc(2)	0.0728	0.0573
sp|P02790|HEMO_HUMAN Hemopexin OS=Homo sapiens GN=HPX PE=1 SV=2	SWPAVGNCSSALR	HexNAc(5)Hex(6)Fuc(1)NeuAc(3)	0.198
sp|P02790|HEMO_HUMAN Hemopexin OS=Homo sapiens GN=HPX PE=1 SV=2	SWPAVGNCSSALR	HexNAc(5)Hex(6)NeuAc(3)	0.305	0.295
sp|P02790|HEMO_HUMAN Hemopexin OS=Homo sapiens GN=HPX PE=1 SV=2	SWPAVGNCSSALR	HexNAc(4)Hex(5)Fuc(1)NeuAc(2)	0.723	0.734
sp|P02790|HEMO_HUMAN Hemopexin OS=Homo sapiens GN=HPX PE=1 SV=2	SWPAVGNCSSALR	HexNAc(4)Hex(5)NeuAc(2)	2.62	3.82
sp|P03951|FA11_HUMAN Coagulation factor XI OS=Homo sapiens GN=F11 PE=1 SV=1	VYSGILNQSEIK	HexNAc(4)Hex(5)NeuAc(1)		0.0479
sp|P03951|FA11_HUMAN Coagulation factor XI OS=Homo sapiens GN=F11 PE=1 SV=1	VYSGILNQSEIK	HexNAc(4)Hex(5)NeuAc(2)	0.141	0.0846
sp|P03952|KLKB1_HUMAN Plasma kallikrein OS=Homo sapiens GN=KLKB1 PE=1 SV=1	LQAPLNYTEFQK	HexNAc(4)Hex(5)NeuAc(2)	0.0331	0.0349
sp|P03952|KLKB1_HUMAN Plasma kallikrein OS=Homo sapiens GN=KLKB1 PE=1 SV=1	GVNFNVSK	HexNAc(4)Hex(5)NeuAc(1)	0.162	0.0634
sp|P03952|KLKB1_HUMAN Plasma kallikrein OS=Homo sapiens GN=KLKB1 PE=1 SV=1	GVNFNVSK	HexNAc(4)Hex(5)NeuAc(2)	0.0373	0.2
sp|P04004|VTNC_HUMAN Vitronectin OS=Homo sapiens GN=VTN PE=1 SV=1	NNATVHEQVGGPSLTSDLQAQSK	HexNAc(6)Hex(7)		0.0232
sp|P04004|VTNC_HUMAN Vitronectin OS=Homo sapiens GN=VTN PE=1 SV=1	NGSLFAFR	HexNAc(3)Hex(4)NeuAc(1)		0.0448
sp|P04004|VTNC_HUMAN Vitronectin OS=Homo sapiens GN=VTN PE=1 SV=1	NGSLFAFR	HexNAc(5)Hex(6)NeuAc(3)		0.00825
sp|P04004|VTNC_HUMAN Vitronectin OS=Homo sapiens GN=VTN PE=1 SV=1	NGSLFAFR	HexNAc(5)Hex(6)Fuc(1)NeuAc(3)	0.0219
sp|P04004|VTNC_HUMAN Vitronectin OS=Homo sapiens GN=VTN PE=1 SV=1	NNATVHEQVGGPSLTSDLQAQSK	HexNAc(4)Hex(5)NeuAc(2)		0.375
sp|P04004|VTNC_HUMAN Vitronectin OS=Homo sapiens GN=VTN PE=1 SV=1	NGSLFAFR	HexNAc(4)Hex(5)NeuAc(2)	0.389	0.327
sp|P04070|PROC_HUMAN Vitamin K-dependent protein C OS=Homo sapiens GN=PROC PE=1 SV=1	EVFVHPNYSK	HexNAc(4)Hex(5)NeuAc(2)		0.182
sp|P04114|APOB_HUMAN Apolipoprotein B-100 OS=Homo sapiens GN=APOB PE=1 SV=2	YDFNSSMLYSTAK	HexNAc(4)Hex(5)NeuAc(2)	0.0518	0.0512
sp|P04114|APOB_HUMAN Apolipoprotein B-100 OS=Homo sapiens GN=APOB PE=1 SV=2	YDFNSSMLYSTAK	HexNAc(4)Hex(5)NeuAc(1)	0.145	0.16
sp|P04114|APOB_HUMAN Apolipoprotein B-100 OS=Homo sapiens GN=APOB PE=1 SV=2	YDFNSSMLYSTAK	HexNAc(5)Hex(4)NeuAc(1)	0.115
sp|P04114|APOB_HUMAN Apolipoprotein B-100 OS=Homo sapiens GN=APOB PE=1 SV=2	FVEGSHNSTVSLTTK	HexNAc(3)Hex(4)NeuAc(1)	0.126	0.142
sp|P04114|APOB_HUMAN Apolipoprotein B-100 OS=Homo sapiens GN=APOB PE=1 SV=2	FVEGSHNSTVSLTTK	HexNAc(3)Hex(6)NeuAc(1)	0.191	0.186
sp|P04114|APOB_HUMAN Apolipoprotein B-100 OS=Homo sapiens GN=APOB PE=1 SV=2	FVEGSHNSTVSLTTK	HexNAc(4)Hex(5)NeuAc(2)	0.213
sp|P04114|APOB_HUMAN Apolipoprotein B-100 OS=Homo sapiens GN=APOB PE=1 SV=2	FVEGSHNSTVSLTTK	HexNAc(4)Hex(5)NeuAc(1)	0.913	0.647
sp|P04114|APOB_HUMAN Apolipoprotein B-100 OS=Homo sapiens GN=APOB PE=1 SV=2	FVEGSHNSTVSLTTK	HexNAc(3)Hex(5)NeuAc(1)	1.01	0.586
sp|P04278|SHBG_HUMAN Sex hormone-binding globulin OS=Homo sapiens GN=SHBG PE=1 SV=2	SHEIWTHSCPQSPGNGTDASH	HexNAc(4)Hex(5)NeuAc(2)	0.0558
sp|P05155|IC1_HUMAN Plasma protease C1 inhibitor OS=Homo sapiens GN=SERPING1 PE=1 SV=2	VGQLQLSHNLSLVILVPQNLK	HexNAc(4)Hex(5)NeuAc(2)	0.0424	0.0386
sp|P05155|IC1_HUMAN Plasma protease C1 inhibitor OS=Homo sapiens GN=SERPING1 PE=1 SV=2	DTFVNASR	HexNAc(4)Hex(5)NeuAc(2)	0.354	0.235
sp|P05156|CFAI_HUMAN Complement factor I OS=Homo sapiens GN=CFI PE=1 SV=2	FLNNGTCTAEGK	HexNAc(4)Hex(5)NeuAc(2)	0.125
sp|P05156|CFAI_HUMAN Complement factor I OS=Homo sapiens GN=CFI PE=1 SV=2	FLNNGTCTAEGK	HexNAc(4)Hex(5)NeuAc(1)		0.195
sp|P05156|CFAI_HUMAN Complement factor I OS=Homo sapiens GN=CFI PE=1 SV=2	LISNCSK	HexNAc(4)Hex(5)NeuAc(2)		0.135
sp|P05543|THBG_HUMAN Thyroxine-binding globulin OS=Homo sapiens GN=SERPINA7 PE=1 SV=2	VTACHSSQPNATLYK	HexNAc(4)Hex(5)NeuAc(1)	0.066	0.0438
sp|P05543|THBG_HUMAN Thyroxine-binding globulin OS=Homo sapiens GN=SERPINA7 PE=1 SV=2	VTACHSSQPNATLYK	HexNAc(4)Hex(5)Fuc(1)NeuAc(2)	0.0416	0.117
sp|P05543|THBG_HUMAN Thyroxine-binding globulin OS=Homo sapiens GN=SERPINA7 PE=1 SV=2	VTACHSSQPNATLYK	HexNAc(4)Hex(5)NeuAc(2)	1.56	0.754
sp|P06681|CO2_HUMAN Complement C2 OS=Homo sapiens GN=C2 PE=1 SV=2	TMFPNLTDVR	HexNAc(4)Hex(5)NeuAc(2)		0.0653
sp|P07339|CATD_HUMAN Cathepsin D OS=Homo sapiens GN=CTSD PE=1 SV=1	GSLSYLNVTR	HexNAc(4)Hex(5)NeuAc(2)	0.0394	0.0601
sp|P07357|CO8A_HUMAN Complement component C8 alpha chain OS=Homo sapiens GN=C8A PE=1 SV=2	GGSSGWSGGLAQNR	HexNAc(4)Hex(5)NeuAc(1)		0.199
sp|P07357|CO8A_HUMAN Complement component C8 alpha chain OS=Homo sapiens GN=C8A PE=1 SV=2	GGSSGWSGGLAQNR	HexNAc(4)Hex(5)NeuAc(2)	0.395	0.629
sp|P08571|CD14_HUMAN Monocyte differentiation antigen CD14 OS=Homo sapiens GN=CD14 PE=1 SV=2	NVSWATGR	HexNAc(4)Hex(5)NeuAc(1)	0.141
sp|P08603|CFAH_HUMAN Complement factor H OS=Homo sapiens GN=CFH PE=1 SV=4	IPCSQPPQIEHGTINSSR	HexNAc(5)Hex(6)NeuAc(3)	0.507	0.0468
sp|P08603|CFAH_HUMAN Complement factor H OS=Homo sapiens GN=CFH PE=1 SV=4	MDGASNVTCINSR	HexNAc(4)Hex(5)NeuAc(2)		0.0593
sp|P08603|CFAH_HUMAN Complement factor H OS=Homo sapiens GN=CFH PE=1 SV=4	IPCSQPPQIEHGTINSSR	HexNAc(3)Hex(4)NeuAc(1)	0.289	0.125
sp|P08603|CFAH_HUMAN Complement factor H OS=Homo sapiens GN=CFH PE=1 SV=4	IPCSQPPQIEHGTINSSR	HexNAc(4)Hex(5)NeuAc(1)	0.423	0.171
sp|P08603|CFAH_HUMAN Complement factor H OS=Homo sapiens GN=CFH PE=1 SV=4	IPCSQPPQIEHGTINSSR	HexNAc(4)Hex(5)Fuc(1)NeuAc(1)	0.205	0.14
sp|P08603|CFAH_HUMAN Complement factor H OS=Homo sapiens GN=CFH PE=1 SV=4	IPCSQPPQIEHGTINSSR	HexNAc(4)Hex(5)Fuc(1)NeuAc(2)	1.46	1.75
sp|P08603|CFAH_HUMAN Complement factor H OS=Homo sapiens GN=CFH PE=1 SV=4	IPCSQPPQIEHGTINSSR	HexNAc(4)Hex(5)NeuAc(2)	6.55	8.49
sp|P0C0L4|CO4A_HUMAN Complement C4-A OS=Homo sapiens GN=C4A PE=1 SV=2	FSDGLESNSSTQFEVK	HexNAc(2)Hex(9)	0.152	0.277
sp|P0C0L4|CO4A_HUMAN Complement C4-A OS=Homo sapiens GN=C4A PE=1 SV=2	GLNVTLSSTGR	HexNAc(4)Hex(5)NeuAc(2)	1.27	1.38
sp|P0C0L5|CO4B_HUMAN Complement C4-B OS=Homo sapiens GN=C4B PE=1 SV=2	FSDGLESNSSTQFEVKK	HexNAc(2)Hex(9)		0.0881
sp|P0C0L5|CO4B_HUMAN Complement C4-B OS=Homo sapiens GN=C4B PE=1 SV=2	FSDGLESNSSTQFEVK	HexNAc(2)Hex(9)		0.192
sp|P10643|CO7_HUMAN Complement component C7 OS=Homo sapiens GN=C7 PE=1 SV=2	NYTLTGR	HexNAc(5)Hex(5)Fuc(1)NeuAc(1)	0.132	0.0844
sp|P10643|CO7_HUMAN Complement component C7 OS=Homo sapiens GN=C7 PE=1 SV=2	NYTLTGR	HexNAc(5)Hex(5)Fuc(1)	0.15	0.078
sp|P10643|CO7_HUMAN Complement component C7 OS=Homo sapiens GN=C7 PE=1 SV=2	NYTLTGR	HexNAc(4)Hex(5)Fuc(1)NeuAc(2)		0.154
sp|P10721|KIT_HUMAN Mast/stem cell growth factor receptor Kit OS=Homo sapiens GN=KIT PE=1 SV=1	HNGTVECK	HexNAc(4)Hex(5)NeuAc(2)		0.189
sp|P10909|CLUS_HUMAN Clusterin OS=Homo sapiens GN=CLU PE=1 SV=1	LANLTQGEDQYYLR	HexNAc(5)Hex(6)NeuAc(3)	0.0108	0.013
sp|P10909|CLUS_HUMAN Clusterin OS=Homo sapiens GN=CLU PE=1 SV=1	LANLTQGEDQYYLR	HexNAc(5)Hex(6)Fuc(1)NeuAc(3)	0.0207	0.00942
sp|P10909|CLUS_HUMAN Clusterin OS=Homo sapiens GN=CLU PE=1 SV=1	LANLTQGEDQYYLR	HexNAc(4)Hex(5)Fuc(1)NeuAc(2)	0.0286	0.0185
sp|P10909|CLUS_HUMAN Clusterin OS=Homo sapiens GN=CLU PE=1 SV=1	LANLTQGEDQYYLR	HexNAc(4)Hex(5)NeuAc(2)	0.52	0.454
sp|P13671|CO6_HUMAN Complement component C6 OS=Homo sapiens GN=C6 PE=1 SV=3	VLNFTTK	HexNAc(4)Hex(5)NeuAc(2)	0.496	0.474
sp|P15144|AMPN_HUMAN Aminopeptidase N OS=Homo sapiens GN=ANPEP PE=1 SV=4	LNYTLSQGHR	HexNAc(4)Hex(5)NeuAc(2)	0.00409
sp|P19823|ITIH2_HUMAN Inter-alpha-trypsin inhibitor heavy chain H2 OS=Homo sapiens GN=ITIH2 PE=1 SV=2	GAFISNFSMTVDGK	HexNAc(5)Hex(5)NeuAc(1)	0.0948	0.0534
sp|P19823|ITIH2_HUMAN Inter-alpha-trypsin inhibitor heavy chain H2 OS=Homo sapiens GN=ITIH2 PE=1 SV=2	GAFISNFSMTVDGK	HexNAc(5)Hex(5)NeuAc(2)		0.0848
sp|P22792|CPN2_HUMAN Carboxypeptidase N subunit 2 OS=Homo sapiens GN=CPN2 PE=1 SV=3	AFGSNPNLTK	HexNAc(4)Hex(5)NeuAc(2)	0.405	0.218
sp|P22891|PROZ_HUMAN Vitamin K-dependent protein Z OS=Homo sapiens GN=PROZ PE=1 SV=2	NITVK	HexNAc(4)Hex(5)NeuAc(2)		0.00832
sp|P23142|FBLN1_HUMAN Fibulin-1 OS=Homo sapiens GN=FBLN1 PE=1 SV=4	CATPHGDNASLEATFVK	HexNAc(4)Hex(5)Fuc(1)NeuAc(2)		0.0228
sp|P23142|FBLN1_HUMAN Fibulin-1 OS=Homo sapiens GN=FBLN1 PE=1 SV=4	CATPHGDNASLEATFVK	HexNAc(4)Hex(5)Fuc(1)NeuAc(1)	0.0414
sp|P23470|PTPRG_HUMAN Receptor-type tyrosine-protein phosphatase gamma OS=Homo sapiens GN=PTPRG PE=1 SV=4	GTDYINASYIMGYYR	HexNAc(4)Hex(5)Fuc(2)NeuAc(1)	0.399
sp|P25311|ZA2G_HUMAN Zinc-alpha-2-glycoprotein OS=Homo sapiens GN=AZGP1 PE=1 SV=2	DIVEYYNDSNGSHVLQGR	HexNAc(4)Hex(5)Fuc(1)NeuAc(2)		0.00233
sp|P43652|AFAM_HUMAN Afamin OS=Homo sapiens GN=AFM PE=1 SV=1	HNFSHCCSK	HexNAc(4)Hex(5)NeuAc(2)		0.00929
sp|P43652|AFAM_HUMAN Afamin OS=Homo sapiens GN=AFM PE=1 SV=1	YAEDKFNETTEK	HexNAc(4)Hex(5)NeuAc(2)	0.193
sp|P43652|AFAM_HUMAN Afamin OS=Homo sapiens GN=AFM PE=1 SV=1	DIENFNSTQK	HexNAc(4)Hex(5)NeuAc(2)	0.262	0.195
sp|P48740|MASP1_HUMAN Mannan-binding lectin serine protease 1 OS=Homo sapiens GN=MASP1 PE=1 SV=3	FGYILHTDNR	HexNAc(4)Hex(5)NeuAc(2)	0.107	0.111
sp|Q04756|HGFA_HUMAN Hepatocyte growth factor activator OS=Homo sapiens GN=HGFAC PE=1 SV=1	CFLGNGTGYR	HexNAc(4)Hex(5)NeuAc(2)	0.0947	0.127
sp|Q13822|ENPP2_HUMAN Ectonucleotide pyrophosphatase/phosphodiesterase family member 2 OS=Homo sapiens GN=ENPP2 PE=1 SV=3	AIIANLTCK	HexNAc(4)Hex(5)NeuAc(2)	0.0256
sp|Q92954|PRG4_HUMAN Proteoglycan 4 OS=Homo sapiens GN=PRG4 PE=1 SV=2	NGTLVAFR	HexNAc(2)Hex(6)	0.0407
sp|Q92954|PRG4_HUMAN Proteoglycan 4 OS=Homo sapiens GN=PRG4 PE=1 SV=2	NGTLVAFR	HexNAc(2)Hex(5)	0.171	0.108
sp|Q9NZP8|C1RL_HUMAN Complement C1r subcomponent-like protein OS=Homo sapiens GN=C1RL PE=1 SV=2	PVTPIAQNQTTLGSSR	HexNAc(4)Hex(5)Fuc(1)NeuAc(2)
sp|Q9NZP8|C1RL_HUMAN Complement C1r subcomponent-like protein OS=Homo sapiens GN=C1RL PE=1 SV=2	PVTPIAQNQTTLGSSR	HexNAc(4)Hex(5)NeuAc(2)
sp|Q9UK55|ZPI_HUMAN Protein Z-dependent protease inhibitor OS=Homo sapiens GN=SERPINA10 PE=1 SV=1	ETFFNLSK	HexNAc(4)Hex(5)NeuAc(2)	0.0488	0.0342
Note: the numbers from column D and E correspond to the percentage of the indivdual glyopeptides from the whole column (one injection).

## Sheet: Fraction4
Table S2. N-glycopeptides identified in each fraction in the pooled cirrhosis samples
Fraction 4
			Cirrhosis_Fc4A1(%)	Cirrhosis_Fc4A2(%)
Protein\nname	Sequence\n(unformatted)	Glycans
sp|O75882|ATRN_HUMAN Attractin OS=Homo sapiens GN=ATRN PE=1 SV=2	CINQSICEK	HexNAc(4)Hex(5)NeuAc(2)	0.00346
sp|O75882|ATRN_HUMAN Attractin OS=Homo sapiens GN=ATRN PE=1 SV=2	NHSCSEGQISIFR	HexNAc(4)Hex(5)NeuAc(2)		0.0495
sp|O75882|ATRN_HUMAN Attractin OS=Homo sapiens GN=ATRN PE=1 SV=2	EWLPLNR	HexNAc(4)Hex(5)NeuAc(2)	0.0639	0.106
sp|P00450|CERU_HUMAN Ceruloplasmin OS=Homo sapiens GN=CP PE=1 SV=1	ENLTAPGSDSAVFFEQGTTR	HexNAc(1)		0.0139
sp|P00450|CERU_HUMAN Ceruloplasmin OS=Homo sapiens GN=CP PE=1 SV=1	ELHHLQEQNVSNAFLDK	HexNAc(5)Hex(6)Fuc(2)NeuAc(3)	0.0159
sp|P00450|CERU_HUMAN Ceruloplasmin OS=Homo sapiens GN=CP PE=1 SV=1	ELHHLQEQNVSNAFLDK	HexNAc(7)Hex(8)Fuc(1)NeuAc(1)	0.0187
sp|P00450|CERU_HUMAN Ceruloplasmin OS=Homo sapiens GN=CP PE=1 SV=1	ENLTAPGSDSAVFFEQGTTR	HexNAc(4)Hex(5)Fuc(2)NeuAc(1)		0.099
sp|P00450|CERU_HUMAN Ceruloplasmin OS=Homo sapiens GN=CP PE=1 SV=1	ELHHLQEQNVSNAFLDK	HexNAc(5)Hex(6)Fuc(1)NeuAc(3)		0.105
sp|P00450|CERU_HUMAN Ceruloplasmin OS=Homo sapiens GN=CP PE=1 SV=1	ELHHLQEQNVSNAFLDK	HexNAc(5)Hex(6)NeuAc(3)		0.11
sp|P00450|CERU_HUMAN Ceruloplasmin OS=Homo sapiens GN=CP PE=1 SV=1	ENLTAPGSDSAVFFEQGTTR	HexNAc(4)Hex(5)NeuAc(2)	0.173	0.168
sp|P00450|CERU_HUMAN Ceruloplasmin OS=Homo sapiens GN=CP PE=1 SV=1	ELHHLQEQNVSNAFLDK	HexNAc(4)Hex(5)Fuc(1)NeuAc(2)	0.659	0.674
sp|P00450|CERU_HUMAN Ceruloplasmin OS=Homo sapiens GN=CP PE=1 SV=1	ELHHLQEQNVSNAFLDK	HexNAc(4)Hex(5)NeuAc(2)	1.02	0.996
sp|P00734|THRB_HUMAN Prothrombin OS=Homo sapiens GN=F2 PE=1 SV=2	GHVNITR	HexNAc(4)Hex(5)Fuc(1)NeuAc(2)	0.00492
sp|P00734|THRB_HUMAN Prothrombin OS=Homo sapiens GN=F2 PE=1 SV=2	GHVNITR	HexNAc(4)Hex(5)NeuAc(1)	0.00515	0.0037
sp|P00734|THRB_HUMAN Prothrombin OS=Homo sapiens GN=F2 PE=1 SV=2	GHVNITR	HexNAc(3)Hex(4)NeuAc(1)	0.00564	0.00461
sp|P00734|THRB_HUMAN Prothrombin OS=Homo sapiens GN=F2 PE=1 SV=2	SRYPHKPEINSTTHPGADLQENFCR	HexNAc(4)Hex(5)NeuAc(2)		0.0556
sp|P00734|THRB_HUMAN Prothrombin OS=Homo sapiens GN=F2 PE=1 SV=2	YPHKPEINSTTHPGADLQENFCR	HexNAc(4)Hex(5)NeuAc(1)	0.0792	0.214
sp|P00734|THRB_HUMAN Prothrombin OS=Homo sapiens GN=F2 PE=1 SV=2	YPHKPEINSTTHPGADLQENFCR	HexNAc(3)Hex(4)NeuAc(1)	0.0961
sp|P00734|THRB_HUMAN Prothrombin OS=Homo sapiens GN=F2 PE=1 SV=2	YPHKPEINSTTHPGADLQENFCR	HexNAc(4)Hex(5)Fuc(1)NeuAc(1)		0.151
sp|P00734|THRB_HUMAN Prothrombin OS=Homo sapiens GN=F2 PE=1 SV=2	YPHKPEINSTTHPGADLQENFCR	HexNAc(4)Hex(5)Fuc(1)NeuAc(2)	0.264	0.29
sp|P00734|THRB_HUMAN Prothrombin OS=Homo sapiens GN=F2 PE=1 SV=2	GHVNITR	HexNAc(4)Hex(5)NeuAc(2)	0.303	0.238
sp|P00734|THRB_HUMAN Prothrombin OS=Homo sapiens GN=F2 PE=1 SV=2	YPHKPEINSTTHPGADLQENFCR	HexNAc(4)Hex(5)NeuAc(2)	5.72	11
sp|P00738|HPT_HUMAN Haptoglobin OS=Homo sapiens GN=HP PE=1 SV=1	VVLHPNYSQVDIGLIK	HexNAc(4)Hex(5)NeuAc(2)	0.126
sp|P00748|FA12_HUMAN Coagulation factor XII OS=Homo sapiens GN=F12 PE=1 SV=3	NVTAEQAR	HexNAc(4)Hex(5)NeuAc(2)	0.0176	0.0136
sp|P01008|ANT3_HUMAN Antithrombin-III OS=Homo sapiens GN=SERPINC1 PE=1 SV=1	WVSNK	HexNAc(4)Hex(5)NeuAc(2)	0.00386	0.055
sp|P01008|ANT3_HUMAN Antithrombin-III OS=Homo sapiens GN=SERPINC1 PE=1 SV=1	AAINKWVSNK	HexNAc(4)Hex(5)NeuAc(2)	0.0186
sp|P01008|ANT3_HUMAN Antithrombin-III OS=Homo sapiens GN=SERPINC1 PE=1 SV=1	AAINKWVSNKTEGR	HexNAc(4)Hex(5)NeuAc(2)	0.137	0.0707
sp|P01042|KNG1_HUMAN Kininogen-1 OS=Homo sapiens GN=KNG1 PE=1 SV=2	ITYSIVQTNCSK	HexNAc(5)Hex(6)Fuc(1)NeuAc(3)	0.0229	0.0223
sp|P01042|KNG1_HUMAN Kininogen-1 OS=Homo sapiens GN=KNG1 PE=1 SV=2	ITYSIVQTNCSK	HexNAc(4)Hex(5)NeuAc(2)	0.152	0.121
sp|P01871|IGHM_HUMAN Ig mu chain C region OS=Homo sapiens GN=IGHM PE=1 SV=3	GLTFQQNASSMCVPDQDTAIR	HexNAc(5)Hex(5)NeuAc(1)		0.013
sp|P01871|IGHM_HUMAN Ig mu chain C region OS=Homo sapiens GN=IGHM PE=1 SV=3	GLTFQQNASSMCVPDQDTAIR	HexNAc(5)Hex(5)Fuc(1)NeuAc(1)	0.0205	0.0563
sp|P01877|IGHA2_HUMAN Ig alpha-2 chain C region OS=Homo sapiens GN=IGHA2 PE=1 SV=3	TPLTANITK	HexNAc(5)Hex(3)Fuc(1)	0.00917	0.0109
sp|P01877|IGHA2_HUMAN Ig alpha-2 chain C region OS=Homo sapiens GN=IGHA2 PE=1 SV=3	TPLTANITK	HexNAc(5)Hex(4)Fuc(1)	0.0326	0.0283
sp|P01877|IGHA2_HUMAN Ig alpha-2 chain C region OS=Homo sapiens GN=IGHA2 PE=1 SV=3	TPLTANITK	HexNAc(5)Hex(5)Fuc(1)	0.0402	0.0322
sp|P01877|IGHA2_HUMAN Ig alpha-2 chain C region OS=Homo sapiens GN=IGHA2 PE=1 SV=3	TPLTANITK	HexNAc(4)Hex(5)Fuc(1)NeuAc(1)	0.0565
sp|P01877|IGHA2_HUMAN Ig alpha-2 chain C region OS=Homo sapiens GN=IGHA2 PE=1 SV=3	TPLTANITK	HexNAc(5)Hex(5)Fuc(1)NeuAc(1)	0.0901
sp|P02749|APOH_HUMAN Beta-2-glycoprotein 1 OS=Homo sapiens GN=APOH PE=1 SV=3	VYKPSAGNNSLYR	HexNAc(7)Hex(8)NeuAc(1)		0.00882
sp|P02749|APOH_HUMAN Beta-2-glycoprotein 1 OS=Homo sapiens GN=APOH PE=1 SV=3	VYKPSAGNNSLYR	HexNAc(4)Hex(5)NeuAc(1)		0.0128
sp|P02749|APOH_HUMAN Beta-2-glycoprotein 1 OS=Homo sapiens GN=APOH PE=1 SV=3	LGNWSAMPSCK	HexNAc(3)Hex(4)NeuAc(1)	0.0247
sp|P02749|APOH_HUMAN Beta-2-glycoprotein 1 OS=Homo sapiens GN=APOH PE=1 SV=3	LGNWSAMPSCK	HexNAc(5)Hex(6)NeuAc(1)	0.05	0.0274
sp|P02749|APOH_HUMAN Beta-2-glycoprotein 1 OS=Homo sapiens GN=APOH PE=1 SV=3	LGNWSAMPSCK	HexNAc(5)Hex(6)NeuAc(2)	0.0598
sp|P02749|APOH_HUMAN Beta-2-glycoprotein 1 OS=Homo sapiens GN=APOH PE=1 SV=3	LGNWSAMPSCK	HexNAc(4)Hex(5)Fuc(1)NeuAc(1)	0.0888	0.0886
sp|P02749|APOH_HUMAN Beta-2-glycoprotein 1 OS=Homo sapiens GN=APOH PE=1 SV=3	VYKPSAGNNSLYR	HexNAc(4)Hex(5)Fuc(2)NeuAc(1)	0.172
sp|P02749|APOH_HUMAN Beta-2-glycoprotein 1 OS=Homo sapiens GN=APOH PE=1 SV=3	LGNWSAMPSCK	HexNAc(4)Hex(5)Fuc(1)NeuAc(2)	0.175	0.168
sp|P02749|APOH_HUMAN Beta-2-glycoprotein 1 OS=Homo sapiens GN=APOH PE=1 SV=3	LGNWSAMPSCK	HexNAc(4)Hex(5)NeuAc(1)	0.504	0.401
sp|P02749|APOH_HUMAN Beta-2-glycoprotein 1 OS=Homo sapiens GN=APOH PE=1 SV=3	VYKPSAGNNSLYR	HexNAc(4)Hex(5)Fuc(1)NeuAc(2)	0.615	0.57
sp|P02749|APOH_HUMAN Beta-2-glycoprotein 1 OS=Homo sapiens GN=APOH PE=1 SV=3	LGNWSAMPSCK	HexNAc(4)Hex(5)Fuc(2)NeuAc(1)		0.78
sp|P02749|APOH_HUMAN Beta-2-glycoprotein 1 OS=Homo sapiens GN=APOH PE=1 SV=3	VYKPSAGNNSLYR	HexNAc(4)Hex(5)NeuAc(2)	1.22	1.69
sp|P02749|APOH_HUMAN Beta-2-glycoprotein 1 OS=Homo sapiens GN=APOH PE=1 SV=3	LGNWSAMPSCK	HexNAc(4)Hex(5)NeuAc(2)	5.27	4.49
sp|P02751|FINC_HUMAN Fibronectin OS=Homo sapiens GN=FN1 PE=1 SV=4	HEEGHMLNCTCFGQGR	HexNAc(4)Hex(5)NeuAc(2)	0.0172
sp|P02751|FINC_HUMAN Fibronectin OS=Homo sapiens GN=FN1 PE=1 SV=4	RHEEGHMLNCTCFGQGR	HexNAc(4)Hex(5)NeuAc(2)	0.0308
sp|P02765|FETUA_HUMAN Alpha-2-HS-glycoprotein OS=Homo sapiens GN=AHSG PE=1 SV=1	VCQDCPLLAPLNDTR	HexNAc(4)Hex(6)NeuAc(1)	0.0219
sp|P02765|FETUA_HUMAN Alpha-2-HS-glycoprotein OS=Homo sapiens GN=AHSG PE=1 SV=1	VCQDCPLLAPLNDTR	HexNAc(3)Hex(4)NeuAc(1)		0.03
sp|P02765|FETUA_HUMAN Alpha-2-HS-glycoprotein OS=Homo sapiens GN=AHSG PE=1 SV=1	VCQDCPLLAPLNDTR	HexNAc(4)Hex(5)Fuc(1)NeuAc(1)		0.0325
sp|P02765|FETUA_HUMAN Alpha-2-HS-glycoprotein OS=Homo sapiens GN=AHSG PE=1 SV=1	VCQDCPLLAPLNDTR	HexNAc(4)Hex(5)Fuc(1)NeuAc(2)		0.102
sp|P02765|FETUA_HUMAN Alpha-2-HS-glycoprotein OS=Homo sapiens GN=AHSG PE=1 SV=1	VCQDCPLLAPLNDTR	HexNAc(4)Hex(6)Fuc(1)NeuAc(1)	0.11	0.145
sp|P02765|FETUA_HUMAN Alpha-2-HS-glycoprotein OS=Homo sapiens GN=AHSG PE=1 SV=1	KVCQDCPLLAPLNDTR	HexNAc(4)Hex(6)Fuc(1)NeuAc(1)	0.157	0.44
sp|P02765|FETUA_HUMAN Alpha-2-HS-glycoprotein OS=Homo sapiens GN=AHSG PE=1 SV=1	VCQDCPLLAPLNDTR	HexNAc(4)Hex(5)NeuAc(1)	0.16	0.163
sp|P02765|FETUA_HUMAN Alpha-2-HS-glycoprotein OS=Homo sapiens GN=AHSG PE=1 SV=1	KVCQDCPLLAPLNDTR	HexNAc(4)Hex(5)NeuAc(2)	1.24	0.839
sp|P02765|FETUA_HUMAN Alpha-2-HS-glycoprotein OS=Homo sapiens GN=AHSG PE=1 SV=1	VCQDCPLLAPLNDTR	HexNAc(4)Hex(5)Fuc(2)NeuAc(1)	2.89
sp|P02765|FETUA_HUMAN Alpha-2-HS-glycoprotein OS=Homo sapiens GN=AHSG PE=1 SV=1	VCQDCPLLAPLNDTR	HexNAc(4)Hex(5)NeuAc(2)	4.43	4.14
sp|P02787|TRFE_HUMAN Serotransferrin OS=Homo sapiens GN=TF PE=1 SV=3	CGLVPVLAENYNK	HexNAc(4)Hex(5)NeuAc(1)	0.0328
sp|P02787|TRFE_HUMAN Serotransferrin OS=Homo sapiens GN=TF PE=1 SV=3	CGLVPVLAENYNK	HexNAc(4)Hex(5)Fuc(2)NeuAc(1)	0.236
sp|P02787|TRFE_HUMAN Serotransferrin OS=Homo sapiens GN=TF PE=1 SV=3	CGLVPVLAENYNK	HexNAc(4)Hex(5)NeuAc(2)	0.429	0.642
sp|P02790|HEMO_HUMAN Hemopexin OS=Homo sapiens GN=HPX PE=1 SV=2	ALPQPQNVTSLLGCTH	HexNAc(4)Hex(5)Fuc(2)NeuAc(1)		0.00111
sp|P02790|HEMO_HUMAN Hemopexin OS=Homo sapiens GN=HPX PE=1 SV=2	ALPQPQNVTSLLGCTH	HexNAc(5)Hex(6)Fuc(2)NeuAc(2)		0.0147
sp|P02790|HEMO_HUMAN Hemopexin OS=Homo sapiens GN=HPX PE=1 SV=2	ALPQPQNVTSLLGCTH	HexNAc(3)Hex(4)NeuAc(1)	0.0151	0.0212
sp|P02790|HEMO_HUMAN Hemopexin OS=Homo sapiens GN=HPX PE=1 SV=2	ALPQPQNVTSLLGCTH	HexNAc(5)Hex(6)NeuAc(3)	0.0227	0.0606
sp|P02790|HEMO_HUMAN Hemopexin OS=Homo sapiens GN=HPX PE=1 SV=2	SWPAVGNCSSALR	HexNAc(5)Hex(6)Fuc(4)NeuAc(1)		0.0367
sp|P02790|HEMO_HUMAN Hemopexin OS=Homo sapiens GN=HPX PE=1 SV=2	ALPQPQNVTSLLGCTH	HexNAc(4)Hex(5)Fuc(1)NeuAc(2)	0.0536	0.0674
sp|P02790|HEMO_HUMAN Hemopexin OS=Homo sapiens GN=HPX PE=1 SV=2	NGTGHGNSTHHGPEYMR	HexNAc(4)Hex(5)NeuAc(2)	0.0603	0.0171
sp|P02790|HEMO_HUMAN Hemopexin OS=Homo sapiens GN=HPX PE=1 SV=2	ALPQPQNVTSLLGCTH	HexNAc(4)Hex(5)NeuAc(1)	0.0748	0.0385
sp|P02790|HEMO_HUMAN Hemopexin OS=Homo sapiens GN=HPX PE=1 SV=2	SWPAVGNCSSALR	HexNAc(3)Hex(6)NeuAc(1)	0.0784	0.134
sp|P02790|HEMO_HUMAN Hemopexin OS=Homo sapiens GN=HPX PE=1 SV=2	SWPAVGNCSSALR	HexNAc(5)Hex(7)Fuc(1)NeuAc(2)	0.117	0.0834
sp|P02790|HEMO_HUMAN Hemopexin OS=Homo sapiens GN=HPX PE=1 SV=2	SWPAVGNCSSALR	HexNAc(4)Hex(5)Fuc(1)NeuAc(1)	0.119	0.143
sp|P02790|HEMO_HUMAN Hemopexin OS=Homo sapiens GN=HPX PE=1 SV=2	SWPAVGNCSSALR	HexNAc(5)Hex(6)Fuc(3)NeuAc(1)	0.167
sp|P02790|HEMO_HUMAN Hemopexin OS=Homo sapiens GN=HPX PE=1 SV=2	SWPAVGNCSSALR	HexNAc(3)Hex(4)NeuAc(1)	0.18	0.198
sp|P02790|HEMO_HUMAN Hemopexin OS=Homo sapiens GN=HPX PE=1 SV=2	SWPAVGNCSSALR	HexNAc(4)Hex(5)Fuc(2)NeuAc(1)		0.185
sp|P02790|HEMO_HUMAN Hemopexin OS=Homo sapiens GN=HPX PE=1 SV=2	SWPAVGNCSSALR	HexNAc(4)Hex(5)NeuAc(1)	0.19	0.531
sp|P02790|HEMO_HUMAN Hemopexin OS=Homo sapiens GN=HPX PE=1 SV=2	SWPAVGNCSSALR	HexNAc(7)Hex(8)NeuAc(1)	0.235
sp|P02790|HEMO_HUMAN Hemopexin OS=Homo sapiens GN=HPX PE=1 SV=2	SWPAVGNCSSALR	HexNAc(5)Hex(6)Fuc(1)NeuAc(2)	0.255	0.268
sp|P02790|HEMO_HUMAN Hemopexin OS=Homo sapiens GN=HPX PE=1 SV=2	SWPAVGNCSSALR	HexNAc(5)Hex(6)NeuAc(2)	0.297	0.311
sp|P02790|HEMO_HUMAN Hemopexin OS=Homo sapiens GN=HPX PE=1 SV=2	SWPAVGNCSSALR	HexNAc(5)Hex(6)Fuc(1)NeuAc(3)	0.505	0.347
sp|P02790|HEMO_HUMAN Hemopexin OS=Homo sapiens GN=HPX PE=1 SV=2	SWPAVGNCSSALR	HexNAc(5)Hex(6)NeuAc(3)	0.856	0.716
sp|P02790|HEMO_HUMAN Hemopexin OS=Homo sapiens GN=HPX PE=1 SV=2	SWPAVGNCSSALR	HexNAc(4)Hex(5)NeuAc(2)	15.9	18.5
sp|P02790|HEMO_HUMAN Hemopexin OS=Homo sapiens GN=HPX PE=1 SV=2	ALPQPQNVTSLLGCTH	HexNAc(4)Hex(5)NeuAc(2)	3.81	3.7
sp|P02790|HEMO_HUMAN Hemopexin OS=Homo sapiens GN=HPX PE=1 SV=2	SWPAVGNCSSALR	HexNAc(4)Hex(5)Fuc(1)NeuAc(2)	4.12	4.49
sp|P03952|KLKB1_HUMAN Plasma kallikrein OS=Homo sapiens GN=KLKB1 PE=1 SV=1	GVNFNVSK	HexNAc(4)Hex(5)NeuAc(2)		0.0208
sp|P03952|KLKB1_HUMAN Plasma kallikrein OS=Homo sapiens GN=KLKB1 PE=1 SV=1	LQAPLNYTEFQK	HexNAc(4)Hex(5)NeuAc(2)	0.0761
sp|P04004|VTNC_HUMAN Vitronectin OS=Homo sapiens GN=VTN PE=1 SV=1	NGSLFAFR	HexNAc(4)Hex(5)Fuc(2)NeuAc(1)		0.0057
sp|P04004|VTNC_HUMAN Vitronectin OS=Homo sapiens GN=VTN PE=1 SV=1	NNATVHEQVGGPSLTSDLQAQSK	HexNAc(4)Hex(5)Fuc(2)NeuAc(1)	0.0101	0.00944
sp|P04004|VTNC_HUMAN Vitronectin OS=Homo sapiens GN=VTN PE=1 SV=1	NNATVHEQVGGPSLTSDLQAQSK	HexNAc(4)Hex(5)NeuAc(2)		0.0264
sp|P04004|VTNC_HUMAN Vitronectin OS=Homo sapiens GN=VTN PE=1 SV=1	NGSLFAFR	HexNAc(2)Hex(4)		0.0677
sp|P04004|VTNC_HUMAN Vitronectin OS=Homo sapiens GN=VTN PE=1 SV=1	NGSLFAFR	HexNAc(4)Hex(5)Fuc(1)NeuAc(2)		0.0682
sp|P04004|VTNC_HUMAN Vitronectin OS=Homo sapiens GN=VTN PE=1 SV=1	NGSLFAFR	HexNAc(4)Hex(5)Fuc(1)NeuAc(1)	0.109
sp|P04004|VTNC_HUMAN Vitronectin OS=Homo sapiens GN=VTN PE=1 SV=1	NGSLFAFR	HexNAc(5)Hex(6)Fuc(1)NeuAc(3)	0.119	0.113
sp|P04004|VTNC_HUMAN Vitronectin OS=Homo sapiens GN=VTN PE=1 SV=1	NGSLFAFR	HexNAc(5)Hex(6)NeuAc(3)	0.13	0.143
sp|P04004|VTNC_HUMAN Vitronectin OS=Homo sapiens GN=VTN PE=1 SV=1	NGSLFAFR	HexNAc(3)Hex(6)NeuAc(1)	0.402	0.434
sp|P04004|VTNC_HUMAN Vitronectin OS=Homo sapiens GN=VTN PE=1 SV=1	NGSLFAFR	HexNAc(3)Hex(4)NeuAc(1)	0.591	0.554
sp|P04004|VTNC_HUMAN Vitronectin OS=Homo sapiens GN=VTN PE=1 SV=1	NGSLFAFR	HexNAc(4)Hex(5)NeuAc(1)	0.775	0.83
sp|P04004|VTNC_HUMAN Vitronectin OS=Homo sapiens GN=VTN PE=1 SV=1	NGSLFAFR	HexNAc(4)Hex(5)NeuAc(2)	12.1	11.2
sp|P04004|VTNC_HUMAN Vitronectin OS=Homo sapiens GN=VTN PE=1 SV=1	NGSLFAFR	HexNAc(3)Hex(5)NeuAc(1)	2.82	2.27
sp|P04114|APOB_HUMAN Apolipoprotein B-100 OS=Homo sapiens GN=APOB PE=1 SV=2	FVEGSHNSTVSLTTK	HexNAc(2)Hex(4)		0.00413
sp|P04114|APOB_HUMAN Apolipoprotein B-100 OS=Homo sapiens GN=APOB PE=1 SV=2	FVEGSHNSTVSLTTK	HexNAc(4)Hex(5)Fuc(1)		0.00867
sp|P04114|APOB_HUMAN Apolipoprotein B-100 OS=Homo sapiens GN=APOB PE=1 SV=2	FVEGSHNSTVSLTTK	HexNAc(4)Hex(4)	0.0135	0.0144
sp|P04114|APOB_HUMAN Apolipoprotein B-100 OS=Homo sapiens GN=APOB PE=1 SV=2	FVEGSHNSTVSLTTK	HexNAc(3)Hex(5)Fuc(1)	0.0155	0.0118
sp|P04114|APOB_HUMAN Apolipoprotein B-100 OS=Homo sapiens GN=APOB PE=1 SV=2	FVEGSHNSTVSLTTK	HexNAc(2)Hex(8)	0.0275	0.0356
sp|P04114|APOB_HUMAN Apolipoprotein B-100 OS=Homo sapiens GN=APOB PE=1 SV=2	FVEGSHNSTVSLTTK	HexNAc(3)Hex(4)	0.0297	0.0238
sp|P04114|APOB_HUMAN Apolipoprotein B-100 OS=Homo sapiens GN=APOB PE=1 SV=2	FNSSYLQGTNQITGR	HexNAc(3)Hex(5)NeuAc(1)	0.0339	0.0274
sp|P04114|APOB_HUMAN Apolipoprotein B-100 OS=Homo sapiens GN=APOB PE=1 SV=2	FVEGSHNSTVSLTTK	HexNAc(2)Hex(6)	0.0417	0.0377
sp|P04114|APOB_HUMAN Apolipoprotein B-100 OS=Homo sapiens GN=APOB PE=1 SV=2	FNSSYLQGTNQITGR	HexNAc(3)Hex(4)NeuAc(1)	0.0442	0.0441
sp|P04114|APOB_HUMAN Apolipoprotein B-100 OS=Homo sapiens GN=APOB PE=1 SV=2	FNSSYLQGTNQITGR	HexNAc(4)Hex(5)Fuc(2)NeuAc(1)		0.0473
sp|P04114|APOB_HUMAN Apolipoprotein B-100 OS=Homo sapiens GN=APOB PE=1 SV=2	FVEGSHNSTVSLTTK	HexNAc(2)Hex(7)	0.0522	0.0405
sp|P04114|APOB_HUMAN Apolipoprotein B-100 OS=Homo sapiens GN=APOB PE=1 SV=2	FVEGSHNSTVSLTTK	HexNAc(4)Hex(4)NeuAc(1)	0.0609	0.0511
sp|P04114|APOB_HUMAN Apolipoprotein B-100 OS=Homo sapiens GN=APOB PE=1 SV=2	FVEGSHNSTVSLTTK	HexNAc(4)Hex(5)Fuc(1)NeuAc(1)	0.0638	0.0496
sp|P04114|APOB_HUMAN Apolipoprotein B-100 OS=Homo sapiens GN=APOB PE=1 SV=2	FVEGSHNSTVSLTTK	HexNAc(4)Hex(5)NeuAc(2)	0.0923	0.0486
sp|P04114|APOB_HUMAN Apolipoprotein B-100 OS=Homo sapiens GN=APOB PE=1 SV=2	FNSSYLQGTNQITGR	HexNAc(4)Hex(5)NeuAc(2)	0.0972
sp|P04114|APOB_HUMAN Apolipoprotein B-100 OS=Homo sapiens GN=APOB PE=1 SV=2	FVEGSHNSTVSLTTK	HexNAc(4)Hex(5)	0.113	0.0921
sp|P04114|APOB_HUMAN Apolipoprotein B-100 OS=Homo sapiens GN=APOB PE=1 SV=2	FVEGSHNSTVSLTTK	HexNAc(3)Hex(6)	0.166	0.143
sp|P04114|APOB_HUMAN Apolipoprotein B-100 OS=Homo sapiens GN=APOB PE=1 SV=2	FVEGSHNSTVSLTTK	HexNAc(3)Hex(5)	0.195	0.162
sp|P04114|APOB_HUMAN Apolipoprotein B-100 OS=Homo sapiens GN=APOB PE=1 SV=2	FVEGSHNSTVSLTTK	HexNAc(3)Hex(6)NeuAc(1)	0.195	0.271
sp|P04114|APOB_HUMAN Apolipoprotein B-100 OS=Homo sapiens GN=APOB PE=1 SV=2	FVEGSHNSTVSLTTK	HexNAc(3)Hex(4)NeuAc(1)	0.259	0.156
sp|P04114|APOB_HUMAN Apolipoprotein B-100 OS=Homo sapiens GN=APOB PE=1 SV=2	FVEGSHNSTVSLTTK	HexNAc(2)Hex(5)	0.361	0.316
sp|P04114|APOB_HUMAN Apolipoprotein B-100 OS=Homo sapiens GN=APOB PE=1 SV=2	FNSSYLQGTNQITGR	HexNAc(4)Hex(5)NeuAc(1)	0.597	0.713
sp|P04114|APOB_HUMAN Apolipoprotein B-100 OS=Homo sapiens GN=APOB PE=1 SV=2	YDFNSSMLYSTAK	HexNAc(4)Hex(5)NeuAc(1)	0.874	1
sp|P04114|APOB_HUMAN Apolipoprotein B-100 OS=Homo sapiens GN=APOB PE=1 SV=2	FVEGSHNSTVSLTTK	HexNAc(4)Hex(5)NeuAc(1)	0.951	1.25
sp|P04114|APOB_HUMAN Apolipoprotein B-100 OS=Homo sapiens GN=APOB PE=1 SV=2	FVEGSHNSTVSLTTK	HexNAc(3)Hex(5)NeuAc(1)	1.72	1.34
sp|P04278|SHBG_HUMAN Sex hormone-binding globulin OS=Homo sapiens GN=SHBG PE=1 SV=2	SHEIWTHSCPQSPGNGTDASH	HexNAc(4)Hex(5)Fuc(2)NeuAc(1)		0.00233
sp|P04278|SHBG_HUMAN Sex hormone-binding globulin OS=Homo sapiens GN=SHBG PE=1 SV=2	SHEIWTHSCPQSPGNGTDASH	HexNAc(4)Hex(5)NeuAc(2)	0.0243	0.0166
sp|P05155|IC1_HUMAN Plasma protease C1 inhibitor OS=Homo sapiens GN=SERPING1 PE=1 SV=2	DTFVNASR	HexNAc(4)Hex(5)Fuc(1)NeuAc(2)	0.0136
sp|P05155|IC1_HUMAN Plasma protease C1 inhibitor OS=Homo sapiens GN=SERPING1 PE=1 SV=2	DTFVNASR	HexNAc(4)Hex(5)NeuAc(2)	0.0813	0.0624
sp|P05156|CFAI_HUMAN Complement factor I OS=Homo sapiens GN=CFI PE=1 SV=2	FLNNGTCTAEGK	HexNAc(4)Hex(5)NeuAc(1)	0.00947
sp|P05156|CFAI_HUMAN Complement factor I OS=Homo sapiens GN=CFI PE=1 SV=2	NGTAVCATNR	HexNAc(4)Hex(5)NeuAc(2)	0.0138	0.0116
sp|P05156|CFAI_HUMAN Complement factor I OS=Homo sapiens GN=CFI PE=1 SV=2	LISNCSK	HexNAc(4)Hex(5)NeuAc(2)	0.024	0.0247
sp|P05156|CFAI_HUMAN Complement factor I OS=Homo sapiens GN=CFI PE=1 SV=2	FLNNGTCTAEGK	HexNAc(4)Hex(5)NeuAc(2)	0.042	0.0333
sp|P05543|THBG_HUMAN Thyroxine-binding globulin OS=Homo sapiens GN=SERPINA7 PE=1 SV=2	VTACHSSQPNATLYK	HexNAc(4)Hex(5)NeuAc(2)	0.0547	0.0481
sp|P05546|HEP2_HUMAN Heparin cofactor 2 OS=Homo sapiens GN=SERPIND1 PE=1 SV=3	DFVNASSK	HexNAc(4)Hex(5)NeuAc(2)	0.0479	0.0363
sp|P05546|HEP2_HUMAN Heparin cofactor 2 OS=Homo sapiens GN=SERPIND1 PE=1 SV=3	NLSMPLLPADFHK	HexNAc(5)Hex(5)Fuc(1)NeuAc(1)	0.102
sp|P05546|HEP2_HUMAN Heparin cofactor 2 OS=Homo sapiens GN=SERPIND1 PE=1 SV=3	NLSMPLLPADFHK	HexNAc(5)Hex(4)NeuAc(2)	0.184	0.155
sp|P05546|HEP2_HUMAN Heparin cofactor 2 OS=Homo sapiens GN=SERPIND1 PE=1 SV=3	NLSMPLLPADFHK	HexNAc(4)Hex(5)NeuAc(2)	0.255	0.214
sp|P06681|CO2_HUMAN Complement C2 OS=Homo sapiens GN=C2 PE=1 SV=2	TMFPNLTDVR	HexNAc(4)Hex(5)Fuc(2)NeuAc(1)		0.0205
sp|P06681|CO2_HUMAN Complement C2 OS=Homo sapiens GN=C2 PE=1 SV=2	QSVPAHFVALNGSK	HexNAc(3)Hex(4)NeuAc(1)	0.0494
sp|P06681|CO2_HUMAN Complement C2 OS=Homo sapiens GN=C2 PE=1 SV=2	QSVPAHFVALNGSK	HexNAc(3)Hex(6)	0.0552	0.0364
sp|P06681|CO2_HUMAN Complement C2 OS=Homo sapiens GN=C2 PE=1 SV=2	QSVPAHFVALNGSK	HexNAc(4)Hex(5)NeuAc(1)	0.065	0.117
sp|P06681|CO2_HUMAN Complement C2 OS=Homo sapiens GN=C2 PE=1 SV=2	TMFPNLTDVR	HexNAc(4)Hex(5)Fuc(1)NeuAc(2)	0.17	0.14
sp|P06681|CO2_HUMAN Complement C2 OS=Homo sapiens GN=C2 PE=1 SV=2	QSVPAHFVALNGSK	HexNAc(3)Hex(5)NeuAc(1)	0.386	0.164
sp|P06681|CO2_HUMAN Complement C2 OS=Homo sapiens GN=C2 PE=1 SV=2	QSVPAHFVALNGSK	HexNAc(2)Hex(8)	0.389	0.416
sp|P06681|CO2_HUMAN Complement C2 OS=Homo sapiens GN=C2 PE=1 SV=2	QSVPAHFVALNGSK	HexNAc(3)Hex(6)NeuAc(1)	0.468	0.395
sp|P06681|CO2_HUMAN Complement C2 OS=Homo sapiens GN=C2 PE=1 SV=2	TMFPNLTDVR	HexNAc(4)Hex(5)NeuAc(2)	0.592	0.491
sp|P06681|CO2_HUMAN Complement C2 OS=Homo sapiens GN=C2 PE=1 SV=2	QSVPAHFVALNGSK	HexNAc(2)Hex(5)	1.25	1.26
sp|P06681|CO2_HUMAN Complement C2 OS=Homo sapiens GN=C2 PE=1 SV=2	QSVPAHFVALNGSK	HexNAc(2)Hex(7)	2.24	3.09
sp|P06681|CO2_HUMAN Complement C2 OS=Homo sapiens GN=C2 PE=1 SV=2	QSVPAHFVALNGSK	HexNAc(2)Hex(6)	2.99	2.25
sp|P08603|CFAH_HUMAN Complement factor H OS=Homo sapiens GN=CFH PE=1 SV=4	IPCSQPPQIEHGTINSSR	HexNAc(5)Hex(6)NeuAc(1)	0.0064
sp|P08603|CFAH_HUMAN Complement factor H OS=Homo sapiens GN=CFH PE=1 SV=4	ISEENETTCYMGK	HexNAc(4)Hex(5)NeuAc(2)	0.0163	0.015
sp|P08603|CFAH_HUMAN Complement factor H OS=Homo sapiens GN=CFH PE=1 SV=4	MDGASNVTCINSR	HexNAc(4)Hex(5)NeuAc(2)	0.024	0.024
sp|P08603|CFAH_HUMAN Complement factor H OS=Homo sapiens GN=CFH PE=1 SV=4	IPCSQPPQIEHGTINSSR	HexNAc(5)Hex(4)Fuc(1)	0.0263
sp|P08603|CFAH_HUMAN Complement factor H OS=Homo sapiens GN=CFH PE=1 SV=4	IPCSQPPQIEHGTINSSR	HexNAc(3)Hex(4)NeuAc(1)		0.0282
sp|P08603|CFAH_HUMAN Complement factor H OS=Homo sapiens GN=CFH PE=1 SV=4	IPCSQPPQIEHGTINSSR	HexNAc(4)Hex(5)Fuc(1)	0.0372	0.0325
sp|P08603|CFAH_HUMAN Complement factor H OS=Homo sapiens GN=CFH PE=1 SV=4	IPCSQPPQIEHGTINSSR	HexNAc(5)Hex(5)Fuc(1)	0.0549	0.0362
sp|P08603|CFAH_HUMAN Complement factor H OS=Homo sapiens GN=CFH PE=1 SV=4	IPCSQPPQIEHGTINSSR	HexNAc(4)Hex(5)Fuc(1)NeuAc(2)	0.111	0.0907
sp|P08603|CFAH_HUMAN Complement factor H OS=Homo sapiens GN=CFH PE=1 SV=4	IPCSQPPQIEHGTINSSR	HexNAc(4)Hex(5)NeuAc(1)	0.259	0.237
sp|P08603|CFAH_HUMAN Complement factor H OS=Homo sapiens GN=CFH PE=1 SV=4	IPCSQPPQIEHGTINSSR	HexNAc(4)Hex(5)Fuc(1)NeuAc(1)	0.615	0.432
sp|P08603|CFAH_HUMAN Complement factor H OS=Homo sapiens GN=CFH PE=1 SV=4	IPCSQPPQIEHGTINSSR	HexNAc(4)Hex(5)Fuc(2)NeuAc(1)	1.53	0.796
sp|P08603|CFAH_HUMAN Complement factor H OS=Homo sapiens GN=CFH PE=1 SV=4	IPCSQPPQIEHGTINSSR	HexNAc(4)Hex(5)NeuAc(2)	2.66	2.32
sp|P0C0L5|CO4B_HUMAN Complement C4-B OS=Homo sapiens GN=C4B PE=1 SV=2	GLNVTLSSTGR	HexNAc(4)Hex(5)NeuAc(2)		0.015
sp|P10643|CO7_HUMAN Complement component C7 OS=Homo sapiens GN=C7 PE=1 SV=2	NYTLTGR	HexNAc(4)Hex(5)Fuc(1)NeuAc(2)		0.0122
sp|P10721|KIT_HUMAN Mast/stem cell growth factor receptor Kit OS=Homo sapiens GN=KIT PE=1 SV=1	HNGTVECK	HexNAc(4)Hex(5)NeuAc(2)	0.0122
sp|P10909|CLUS_HUMAN Clusterin OS=Homo sapiens GN=CLU PE=1 SV=1	HNSTGCLR	HexNAc(4)Hex(5)NeuAc(2)	0.0122
sp|P11279|LAMP1_HUMAN Lysosome-associated membrane glycoprotein 1 OS=Homo sapiens GN=LAMP1 PE=1 SV=3	GHTLTLNFTR	HexNAc(3)Hex(6)NeuAc(1)	0.0331	0.0422
sp|P13671|CO6_HUMAN Complement component C6 OS=Homo sapiens GN=C6 PE=1 SV=3	VLNFTTK	HexNAc(4)Hex(5)Fuc(2)NeuAc(1)		0.00356
sp|P13671|CO6_HUMAN Complement component C6 OS=Homo sapiens GN=C6 PE=1 SV=3	VLNFTTK	HexNAc(4)Hex(5)NeuAc(2)	0.182	0.135
sp|P19823|ITIH2_HUMAN Inter-alpha-trypsin inhibitor heavy chain H2 OS=Homo sapiens GN=ITIH2 PE=1 SV=2	GAFISNFSMTVDGK	HexNAc(4)Hex(5)Fuc(2)NeuAc(1)	0.099
sp|P19823|ITIH2_HUMAN Inter-alpha-trypsin inhibitor heavy chain H2 OS=Homo sapiens GN=ITIH2 PE=1 SV=2	GAFISNFSMTVDGK	HexNAc(4)Hex(5)NeuAc(2)	0.15	0.157
sp|P22792|CPN2_HUMAN Carboxypeptidase N subunit 2 OS=Homo sapiens GN=CPN2 PE=1 SV=3	AFGSNPNLTK	HexNAc(4)Hex(5)NeuAc(2)	0.0468	0.0234
sp|P26927|HGFL_HUMAN Hepatocyte growth factor-like protein OS=Homo sapiens GN=MST1 PE=1 SV=2	GTANTTTAGVPCQR	HexNAc(4)Hex(5)NeuAc(2)	0.00178
sp|P27169|PON1_HUMAN Serum paraoxonase/arylesterase 1 OS=Homo sapiens GN=PON1 PE=1 SV=3	HANWTLTPLK	HexNAc(4)Hex(5)NeuAc(2)		0.166
sp|P27918|PROP_HUMAN Properdin OS=Homo sapiens GN=CFP PE=1 SV=2	NVTFWGR	HexNAc(4)Hex(5)Fuc(1)NeuAc(1)		0.0315
sp|P43652|AFAM_HUMAN Afamin OS=Homo sapiens GN=AFM PE=1 SV=1	YAEDKFNETTEK	HexNAc(4)Hex(5)Fuc(1)NeuAc(2)	0.0034
sp|P43652|AFAM_HUMAN Afamin OS=Homo sapiens GN=AFM PE=1 SV=1	FNETTEK	HexNAc(4)Hex(5)NeuAc(2)	0.00971	0.00826
sp|P43652|AFAM_HUMAN Afamin OS=Homo sapiens GN=AFM PE=1 SV=1	DIENFNSTQK	HexNAc(4)Hex(5)Fuc(2)NeuAc(1)	0.0105	0.0195
sp|P43652|AFAM_HUMAN Afamin OS=Homo sapiens GN=AFM PE=1 SV=1	DIENFNSTQK	HexNAc(4)Hex(5)NeuAc(2)	0.0497	0.0399
sp|P43652|AFAM_HUMAN Afamin OS=Homo sapiens GN=AFM PE=1 SV=1	YAEDKFNETTEK	HexNAc(4)Hex(5)NeuAc(2)	0.0545	0.0494
sp|P49908|SEPP1_HUMAN Selenoprotein P OS=Homo sapiens GN=SELENOP PE=1 SV=3	EGYSNISYIVVNHQGISSR	HexNAc(4)Hex(5)NeuAc(2)	0.195	0.101
sp|P51884|LUM_HUMAN Lumican OS=Homo sapiens GN=LUM PE=1 SV=2	LHINHNNLTESVGPLPK	HexNAc(9)Hex(10)		0.00777
sp|P51884|LUM_HUMAN Lumican OS=Homo sapiens GN=LUM PE=1 SV=2	KLHINHNNLTESVGPLPK	HexNAc(6)Hex(7)Fuc(2)NeuAc(3)	0.0164
sp|P51884|LUM_HUMAN Lumican OS=Homo sapiens GN=LUM PE=1 SV=2	KLHINHNNLTESVGPLPK	HexNAc(6)Hex(7)Fuc(1)NeuAc(2)	0.0298	0.113
sp|P51884|LUM_HUMAN Lumican OS=Homo sapiens GN=LUM PE=1 SV=2	KLHINHNNLTESVGPLPK	HexNAc(6)Hex(7)Fuc(1)NeuAc(1)	0.0384	0.0725
sp|P51884|LUM_HUMAN Lumican OS=Homo sapiens GN=LUM PE=1 SV=2	KLHINHNNLTESVGPLPK	HexNAc(7)Hex(8)Fuc(1)NeuAc(1)	0.0437	0.0736
sp|P51884|LUM_HUMAN Lumican OS=Homo sapiens GN=LUM PE=1 SV=2	KLHINHNNLTESVGPLPK	HexNAc(4)Hex(6)Fuc(1)NeuAc(1)	0.0571
sp|P51884|LUM_HUMAN Lumican OS=Homo sapiens GN=LUM PE=1 SV=2	LHINHNNLTESVGPLPK	HexNAc(6)Hex(7)Fuc(1)NeuAc(1)	0.0695	0.0878
sp|P51884|LUM_HUMAN Lumican OS=Homo sapiens GN=LUM PE=1 SV=2	LHINHNNLTESVGPLPK	HexNAc(7)Hex(8)Fuc(1)NeuAc(2)	0.108	0.071
sp|P51884|LUM_HUMAN Lumican OS=Homo sapiens GN=LUM PE=1 SV=2	LHINHNNLTESVGPLPK	HexNAc(7)Hex(8)Fuc(1)NeuAc(1)	0.124
sp|P51884|LUM_HUMAN Lumican OS=Homo sapiens GN=LUM PE=1 SV=2	KLHINHNNLTESVGPLPK	HexNAc(5)Hex(6)Fuc(1)NeuAc(2)	0.15	0.12
sp|P51884|LUM_HUMAN Lumican OS=Homo sapiens GN=LUM PE=1 SV=2	LHINHNNLTESVGPLPK	HexNAc(5)Hex(6)Fuc(2)NeuAc(3)	0.193	0.206
sp|P51884|LUM_HUMAN Lumican OS=Homo sapiens GN=LUM PE=1 SV=2	LHINHNNLTESVGPLPK	HexNAc(6)Hex(7)Fuc(1)NeuAc(2)	0.282	0.263
sp|P51884|LUM_HUMAN Lumican OS=Homo sapiens GN=LUM PE=1 SV=2	KLHINHNNLTESVGPLPK	HexNAc(4)Hex(5)Fuc(1)NeuAc(1)	0.309	0.281
sp|P51884|LUM_HUMAN Lumican OS=Homo sapiens GN=LUM PE=1 SV=2	LHINHNNLTESVGPLPK	HexNAc(5)Hex(6)Fuc(1)NeuAc(1)	0.394	0.399
sp|P51884|LUM_HUMAN Lumican OS=Homo sapiens GN=LUM PE=1 SV=2	LHINHNNLTESVGPLPK	HexNAc(5)Hex(6)Fuc(1)NeuAc(2)	0.619	0.547
sp|P51884|LUM_HUMAN Lumican OS=Homo sapiens GN=LUM PE=1 SV=2	LHINHNNLTESVGPLPK	HexNAc(4)Hex(5)Fuc(1)NeuAc(2)	0.734	0.201
sp|P51884|LUM_HUMAN Lumican OS=Homo sapiens GN=LUM PE=1 SV=2	LHINHNNLTESVGPLPK	HexNAc(4)Hex(5)Fuc(1)NeuAc(1)	0.796	0.816
sp|P51884|LUM_HUMAN Lumican OS=Homo sapiens GN=LUM PE=1 SV=2	KLHINHNNLTESVGPLPK	HexNAc(4)Hex(5)Fuc(1)NeuAc(2)	0.9	0.496
sp|Q07954|LRP1_HUMAN Prolow-density lipoprotein receptor-related protein 1 OS=Homo sapiens GN=LRP1 PE=1 SV=2	WTGHNVTVVQR	HexNAc(4)Hex(5)Fuc(1)NeuAc(1)	0.0256
sp|Q07954|LRP1_HUMAN Prolow-density lipoprotein receptor-related protein 1 OS=Homo sapiens GN=LRP1 PE=1 SV=2	WTGHNVTVVQR	HexNAc(4)Hex(5)Fuc(1)	0.0345	0.0296
sp|Q13201|MMRN1_HUMAN Multimerin-1 OS=Homo sapiens GN=MMRN1 PE=1 SV=3	FNPGAESVVLSNSTLK	HexNAc(4)Hex(5)Fuc(1)NeuAc(1)	0.0424
sp|Q13822|ENPP2_HUMAN Ectonucleotide pyrophosphatase/phosphodiesterase family member 2 OS=Homo sapiens GN=ENPP2 PE=1 SV=3	PAPNNGTHGSLNHLLR	HexNAc(2)Hex(9)	0.0402	0.0441
sp|Q16620|NTRK2_HUMAN BDNF/NT-3 growth factors receptor OS=Homo sapiens GN=NTRK2 PE=1 SV=1	NSNLQHINFTR	HexNAc(2)Hex(5)		0.0213
sp|Q92954|PRG4_HUMAN Proteoglycan 4 OS=Homo sapiens GN=PRG4 PE=1 SV=2	NGTLVAFR	HexNAc(2)Hex(5)	0.0606	0.0551
sp|Q96KN2|CNDP1_HUMAN Beta-Ala-His dipeptidase OS=Homo sapiens GN=CNDP1 PE=1 SV=4	LVPHMNVSAVEK	HexNAc(5)Hex(6)NeuAc(3)	0.0214
sp|Q96KN2|CNDP1_HUMAN Beta-Ala-His dipeptidase OS=Homo sapiens GN=CNDP1 PE=1 SV=4	LVPHMNVSAVEK	HexNAc(4)Hex(5)NeuAc(2)	0.0682	0.0705
sp|Q9NZP8|C1RL_HUMAN Complement C1r subcomponent-like protein OS=Homo sapiens GN=C1RL PE=1 SV=2	PVTPIAQNQTTLGSSR	HexNAc(4)Hex(5)Fuc(1)NeuAc(2)		0.0291
sp|Q9NZP8|C1RL_HUMAN Complement C1r subcomponent-like protein OS=Homo sapiens GN=C1RL PE=1 SV=2	PVTPIAQNQTTLGSSR	HexNAc(4)Hex(5)NeuAc(2)	0.193	0.193
Note: the numbers from column D and E correspond to the percentage of the indivdual glyopeptides from the whole column (one injection).

## Sheet: Fraction5
Table S2. N-glycopeptides identified in each fraction in the pooled cirrhosis samples
Fraction 5
			Cirrhosis_Fc5r1(%)	Cirrhosis_Fc5r2(%)
Protein\nname	Sequence\n(unformatted)	Glycans
sp|O75882|ATRN_HUMAN Attractin OS=Homo sapiens GN=ATRN PE=1 SV=2	YNWSFIHCPACQCNGHSK	HexNAc(3)Hex(5)NeuAc(1)	0.0206
sp|O75882|ATRN_HUMAN Attractin OS=Homo sapiens GN=ATRN PE=1 SV=2	YNWSFIHCPACQCNGHSK	HexNAc(2)Hex(7)		0.0349
sp|O75882|ATRN_HUMAN Attractin OS=Homo sapiens GN=ATRN PE=1 SV=2	YNWSFIHCPACQCNGHSK	HexNAc(3)Hex(6)	0.0384
sp|O75882|ATRN_HUMAN Attractin OS=Homo sapiens GN=ATRN PE=1 SV=2	YNWSFIHCPACQCNGHSK	HexNAc(3)Hex(6)NeuAc(1)	0.0437	0.0213
sp|O75882|ATRN_HUMAN Attractin OS=Homo sapiens GN=ATRN PE=1 SV=2	YNWSFIHCPACQCNGHSK	HexNAc(2)Hex(6)		0.0701
sp|O75882|ATRN_HUMAN Attractin OS=Homo sapiens GN=ATRN PE=1 SV=2	YNWSFIHCPACQCNGHSK	HexNAc(2)Hex(5)	0.407	0.345
sp|P00450|CERU_HUMAN Ceruloplasmin OS=Homo sapiens GN=CP PE=1 SV=1	EHEGAIYPDNTTDFQR	HexNAc(4)Hex(5)Fuc(2)NeuAc(1)	0.0087
sp|P00450|CERU_HUMAN Ceruloplasmin OS=Homo sapiens GN=CP PE=1 SV=1	ELHHLQEQNVSNAFLDK	HexNAc(5)Hex(6)NeuAc(3)	0.0143	0.0452
sp|P00450|CERU_HUMAN Ceruloplasmin OS=Homo sapiens GN=CP PE=1 SV=1	ELHHLQEQNVSNAFLDK	HexNAc(5)Hex(6)Fuc(1)NeuAc(3)		0.0212
sp|P00450|CERU_HUMAN Ceruloplasmin OS=Homo sapiens GN=CP PE=1 SV=1	AGLQAFFQVQECNK	HexNAc(4)Hex(5)Fuc(2)NeuAc(1)	0.0856
sp|P00450|CERU_HUMAN Ceruloplasmin OS=Homo sapiens GN=CP PE=1 SV=1	AGLQAFFQVQECNK	HexNAc(4)Hex(5)NeuAc(2)	0.125	0.084
sp|P00450|CERU_HUMAN Ceruloplasmin OS=Homo sapiens GN=CP PE=1 SV=1	ELHHLQEQNVSNAFLDK	HexNAc(4)Hex(5)Fuc(1)NeuAc(2)		0.154
sp|P00450|CERU_HUMAN Ceruloplasmin OS=Homo sapiens GN=CP PE=1 SV=1	ELHHLQEQNVSNAFLDK	HexNAc(4)Hex(5)NeuAc(2)	0.386	0.288
sp|P00734|THRB_HUMAN Prothrombin OS=Homo sapiens GN=F2 PE=1 SV=2	YPHKPEINSTTHPGADLQENFCR	HexNAc(4)Hex(5)Fuc(2)NeuAc(1)	0.0285
sp|P00734|THRB_HUMAN Prothrombin OS=Homo sapiens GN=F2 PE=1 SV=2	GHVNITR	HexNAc(4)Hex(5)NeuAc(2)	0.0555	0.032
sp|P00734|THRB_HUMAN Prothrombin OS=Homo sapiens GN=F2 PE=1 SV=2	YPHKPEINSTTHPGADLQENFCR	HexNAc(4)Hex(5)NeuAc(2)	0.765	1.13
sp|P00738|HPT_HUMAN Haptoglobin OS=Homo sapiens GN=HP PE=1 SV=1	VVLHPNYSQVDIGLIK	HexNAc(5)Hex(6)Fuc(1)NeuAc(2)	0.023
sp|P00738|HPT_HUMAN Haptoglobin OS=Homo sapiens GN=HP PE=1 SV=1	VVLHPNYSQVDIGLIK	HexNAc(3)Hex(4)NeuAc(1)	0.0484
sp|P00738|HPT_HUMAN Haptoglobin OS=Homo sapiens GN=HP PE=1 SV=1	VVLHPNYSQVDIGLIK	HexNAc(5)Hex(6)NeuAc(1)		0.0661
sp|P00738|HPT_HUMAN Haptoglobin OS=Homo sapiens GN=HP PE=1 SV=1	VVLHPNYSQVDIGLIK	HexNAc(4)Hex(5)NeuAc(1)		0.0932
sp|P00738|HPT_HUMAN Haptoglobin OS=Homo sapiens GN=HP PE=1 SV=1	VVLHPNYSQVDIGLIK	HexNAc(5)Hex(6)NeuAc(2)	0.128	0.101
sp|P00738|HPT_HUMAN Haptoglobin OS=Homo sapiens GN=HP PE=1 SV=1	VVLHPNYSQVDIGLIK	HexNAc(4)Hex(5)NeuAc(2)	3.67	3.05
sp|P00748|FA12_HUMAN Coagulation factor XII OS=Homo sapiens GN=F12 PE=1 SV=3	NVTAEQAR	HexNAc(4)Hex(5)NeuAc(2)	0.0047
sp|P01008|ANT3_HUMAN Antithrombin-III OS=Homo sapiens GN=SERPINC1 PE=1 SV=1	WVSNK	HexNAc(4)Hex(5)NeuAc(2)		0.0153
sp|P01008|ANT3_HUMAN Antithrombin-III OS=Homo sapiens GN=SERPINC1 PE=1 SV=1	LGACNDTLQQLMEVFK	HexNAc(4)Hex(6)Fuc(1)NeuAc(1)	0.0186
sp|P01008|ANT3_HUMAN Antithrombin-III OS=Homo sapiens GN=SERPINC1 PE=1 SV=1	LGACNDTLQQLMEVFK	HexNAc(5)Hex(4)NeuAc(2)		0.032
sp|P01008|ANT3_HUMAN Antithrombin-III OS=Homo sapiens GN=SERPINC1 PE=1 SV=1	LGACNDTLQQLMEVFK	HexNAc(4)Hex(5)NeuAc(2)	0.0493	0.0595
sp|P01009|A1AT_HUMAN Alpha-1-antitrypsin OS=Homo sapiens GN=SERPINA1 PE=1 SV=3	YLGNATAIFFLPDEGK	HexNAc(4)Hex(5)NeuAc(2)	0.0677	0.0651
sp|P01024|CO3_HUMAN Complement C3 OS=Homo sapiens GN=C3 PE=1 SV=2	TVLTPATNHMGNVTFTIPANR	HexNAc(2)Hex(6)	0.0873	0.106
sp|P01042|KNG1_HUMAN Kininogen-1 OS=Homo sapiens GN=KNG1 PE=1 SV=2	HGIQYFNNNTQHSSLFMLNEVK	HexNAc(5)Hex(6)Fuc(1)NeuAc(3)	0.0752	0.153
sp|P01042|KNG1_HUMAN Kininogen-1 OS=Homo sapiens GN=KNG1 PE=1 SV=2	HGIQYFNNNTQHSSLFMLNEVK	HexNAc(5)Hex(6)NeuAc(3)	0.0905
sp|P01042|KNG1_HUMAN Kininogen-1 OS=Homo sapiens GN=KNG1 PE=1 SV=2	HGIQYFNNNTQHSSLFMLNEVK	HexNAc(4)Hex(5)NeuAc(2)	0.301	0.279
sp|P01042|KNG1_HUMAN Kininogen-1 OS=Homo sapiens GN=KNG1 PE=1 SV=2	HGIQYFNNNTQHSSLFMLNEVK	HexNAc(6)Hex(5)Fuc(1)	0.53
sp|P01042|KNG1_HUMAN Kininogen-1 OS=Homo sapiens GN=KNG1 PE=1 SV=2	HGIQYFNNNTQHSSLFMLNEVK	HexNAc(6)Hex(4)NeuAc(1)	1.77	0.0917
sp|P01871|IGHM_HUMAN Ig mu chain C region OS=Homo sapiens GN=IGHM PE=1 SV=3	PTLYNVSLVMSDTAGTC	HexNAc(4)Hex(5)Fuc(1)		0.00347
sp|P01871|IGHM_HUMAN Ig mu chain C region OS=Homo sapiens GN=IGHM PE=1 SV=3	STGKPTLYNVSLVMSDTAGTCY	HexNAc(2)Hex(8)		0.0308
sp|P01871|IGHM_HUMAN Ig mu chain C region OS=Homo sapiens GN=IGHM PE=1 SV=3	STGKPTLYNVSLVMSDTAGTCY	HexNAc(2)Hex(6)	0.0346
sp|P01876|IGHA1_HUMAN Ig alpha-1 chain C region OS=Homo sapiens GN=IGHA1 PE=1 SV=2	LAGKPTHVNVSVVMAEVDGTCY	HexNAc(5)Hex(4)Fuc(1)		0.0266
sp|P01876|IGHA1_HUMAN Ig alpha-1 chain C region OS=Homo sapiens GN=IGHA1 PE=1 SV=2	LAGKPTHVNVSVVMAEVDGTCY	HexNAc(2)Hex(5)	0.0308
sp|P01877|IGHA2_HUMAN Ig alpha-2 chain C region OS=Homo sapiens GN=IGHA2 PE=1 SV=3	TPLTANITK	HexNAc(5)Hex(4)Fuc(1)	0.0148	0.0102
sp|P01877|IGHA2_HUMAN Ig alpha-2 chain C region OS=Homo sapiens GN=IGHA2 PE=1 SV=3	TPLTANITK	HexNAc(5)Hex(5)Fuc(1)	0.0225	0.0124
sp|P01877|IGHA2_HUMAN Ig alpha-2 chain C region OS=Homo sapiens GN=IGHA2 PE=1 SV=3	TPLTANITK	HexNAc(5)Hex(5)Fuc(1)NeuAc(1)	0.0531	0.0338
sp|P02745|C1QA_HUMAN Complement C1q subcomponent subunit A OS=Homo sapiens GN=C1QA PE=1 SV=2	RNPPMGGNVVIFDTVITNQEEPYQNHSGR	HexNAc(4)Hex(5)NeuAc(1)	0.0785
sp|P02745|C1QA_HUMAN Complement C1q subcomponent subunit A OS=Homo sapiens GN=C1QA PE=1 SV=2	RNPPMGGNVVIFDTVITNQEEPYQNHSGR	HexNAc(4)Hex(5)Fuc(1)NeuAc(1)		0.276
sp|P02749|APOH_HUMAN Beta-2-glycoprotein 1 OS=Homo sapiens GN=APOH PE=1 SV=3	LGNWSAMPSCK	HexNAc(6)Hex(7)	0.00466
sp|P02749|APOH_HUMAN Beta-2-glycoprotein 1 OS=Homo sapiens GN=APOH PE=1 SV=3	LGNWSAMPSCK	HexNAc(5)Hex(6)Fuc(1)NeuAc(1)		0.0112
sp|P02749|APOH_HUMAN Beta-2-glycoprotein 1 OS=Homo sapiens GN=APOH PE=1 SV=3	LGNWSAMPSCK	HexNAc(4)Hex(6)NeuAc(1)	0.0148
sp|P02749|APOH_HUMAN Beta-2-glycoprotein 1 OS=Homo sapiens GN=APOH PE=1 SV=3	LGNWSAMPSCK	HexNAc(3)Hex(4)		0.0159
sp|P02749|APOH_HUMAN Beta-2-glycoprotein 1 OS=Homo sapiens GN=APOH PE=1 SV=3	VYKPSAGNNSLYR	HexNAc(5)Hex(6)NeuAc(3)	0.0303
sp|P02749|APOH_HUMAN Beta-2-glycoprotein 1 OS=Homo sapiens GN=APOH PE=1 SV=3	VYKPSAGNNSLYR	HexNAc(5)Hex(6)Fuc(1)NeuAc(3)	0.0463
sp|P02749|APOH_HUMAN Beta-2-glycoprotein 1 OS=Homo sapiens GN=APOH PE=1 SV=3	VYKPSAGNNSLYR	HexNAc(4)Hex(5)Fuc(2)NeuAc(1)		0.0564
sp|P02749|APOH_HUMAN Beta-2-glycoprotein 1 OS=Homo sapiens GN=APOH PE=1 SV=3	LGNWSAMPSCK	HexNAc(5)Hex(6)NeuAc(1)	0.0602	0.0558
sp|P02749|APOH_HUMAN Beta-2-glycoprotein 1 OS=Homo sapiens GN=APOH PE=1 SV=3	LGNWSAMPSCK	HexNAc(4)Hex(5)Fuc(2)NeuAc(1)	0.0687
sp|P02749|APOH_HUMAN Beta-2-glycoprotein 1 OS=Homo sapiens GN=APOH PE=1 SV=3	LGNWSAMPSCK	HexNAc(4)Hex(5)Fuc(1)NeuAc(1)	0.2	0.188
sp|P02749|APOH_HUMAN Beta-2-glycoprotein 1 OS=Homo sapiens GN=APOH PE=1 SV=3	VYKPSAGNNSLYR	HexNAc(4)Hex(5)Fuc(1)NeuAc(2)	0.275	0.262
sp|P02749|APOH_HUMAN Beta-2-glycoprotein 1 OS=Homo sapiens GN=APOH PE=1 SV=3	VYKPSAGNNSLYR	HexNAc(4)Hex(5)NeuAc(2)	0.65	0.481
sp|P02749|APOH_HUMAN Beta-2-glycoprotein 1 OS=Homo sapiens GN=APOH PE=1 SV=3	LGNWSAMPSCK	HexNAc(4)Hex(5)NeuAc(1)	1.17	1.83
sp|P02749|APOH_HUMAN Beta-2-glycoprotein 1 OS=Homo sapiens GN=APOH PE=1 SV=3	LGNWSAMPSCK	HexNAc(4)Hex(5)NeuAc(2)	1.27	1.26
sp|P02751|FINC_HUMAN Fibronectin OS=Homo sapiens GN=FN1 PE=1 SV=4	GGNSNGALCHFPFLYNNHNYTDCTSEGR	HexNAc(4)Hex(5)NeuAc(1)	0.105
sp|P02765|FETUA_HUMAN Alpha-2-HS-glycoprotein OS=Homo sapiens GN=AHSG PE=1 SV=1	VCQDCPLLAPLNDTR	HexNAc(4)Hex(5)Fuc(2)NeuAc(1)		0.0186
sp|P02765|FETUA_HUMAN Alpha-2-HS-glycoprotein OS=Homo sapiens GN=AHSG PE=1 SV=1	VCQDCPLLAPLNDTR	HexNAc(4)Hex(5)NeuAc(2)	0.0826
sp|P02787|TRFE_HUMAN Serotransferrin OS=Homo sapiens GN=TF PE=1 SV=3	CGLVPVLAENYNK	HexNAc(4)Hex(5)Fuc(2)NeuAc(1)		0.0478
sp|P02787|TRFE_HUMAN Serotransferrin OS=Homo sapiens GN=TF PE=1 SV=3	CGLVPVLAENYNK	HexNAc(4)Hex(5)NeuAc(2)		0.0685
sp|P02790|HEMO_HUMAN Hemopexin OS=Homo sapiens GN=HPX PE=1 SV=2	ALPQPQNVTSLLGCTH	HexNAc(5)Hex(5)Fuc(1)NeuAc(1)	0.00173
sp|P02790|HEMO_HUMAN Hemopexin OS=Homo sapiens GN=HPX PE=1 SV=2	ALPQPQNVTSLLGCTH	HexNAc(5)Hex(7)Fuc(1)NeuAc(1)	0.00251
sp|P02790|HEMO_HUMAN Hemopexin OS=Homo sapiens GN=HPX PE=1 SV=2	ALPQPQNVTSLLGCT	HexNAc(4)Hex(5)NeuAc(2)	0.0137
sp|P02790|HEMO_HUMAN Hemopexin OS=Homo sapiens GN=HPX PE=1 SV=2	ALPQPQNVTSLLGCTH	HexNAc(9)Hex(4)		0.0248
sp|P02790|HEMO_HUMAN Hemopexin OS=Homo sapiens GN=HPX PE=1 SV=2	ALPQPQNVTSLLGCTH	HexNAc(5)Hex(4)NeuAc(2)	0.0273	0.0232
sp|P02790|HEMO_HUMAN Hemopexin OS=Homo sapiens GN=HPX PE=1 SV=2	ALPQPQNVTSLLGCTH	HexNAc(5)Hex(6)Fuc(1)NeuAc(1)		0.0279
sp|P02790|HEMO_HUMAN Hemopexin OS=Homo sapiens GN=HPX PE=1 SV=2	ALPQPQNVTSLLGCTH	HexNAc(4)Hex(4)NeuAc(1)	0.0582
sp|P02790|HEMO_HUMAN Hemopexin OS=Homo sapiens GN=HPX PE=1 SV=2	ALPQPQNVTSLLGCTH	HexNAc(4)Hex(5)Fuc(2)NeuAc(1)	0.0647	6.62
sp|P02790|HEMO_HUMAN Hemopexin OS=Homo sapiens GN=HPX PE=1 SV=2	ALPQPQNVTSLLGCTH	HexNAc(4)Hex(6)Fuc(1)NeuAc(1)		0.0648
sp|P02790|HEMO_HUMAN Hemopexin OS=Homo sapiens GN=HPX PE=1 SV=2	ALPQPQNVTSLLGCTH	HexNAc(4)Hex(6)NeuAc(1)	0.0672	0.189
sp|P02790|HEMO_HUMAN Hemopexin OS=Homo sapiens GN=HPX PE=1 SV=2	ALPQPQNVTSLLGCTH	HexNAc(1)	0.0688	0.0883
sp|P02790|HEMO_HUMAN Hemopexin OS=Homo sapiens GN=HPX PE=1 SV=2	LNAAKALPQPQNVTSLLGCTH	HexNAc(5)Hex(5)Fuc(1)NeuAc(1)	0.0954	0.131
sp|P02790|HEMO_HUMAN Hemopexin OS=Homo sapiens GN=HPX PE=1 SV=2	ALPQPQNVTSLLGCTH	HexNAc(5)Hex(9)Fuc(1)		0.113
sp|P02790|HEMO_HUMAN Hemopexin OS=Homo sapiens GN=HPX PE=1 SV=2	ALPQPQNVTSLLGCTH	HexNAc(3)Hex(4)	0.119	0.0642
sp|P02790|HEMO_HUMAN Hemopexin OS=Homo sapiens GN=HPX PE=1 SV=2	ALPQPQNVTSLLGCTH	HexNAc(5)Hex(6)Fuc(1)NeuAc(2)	0.195	0.0914
sp|P02790|HEMO_HUMAN Hemopexin OS=Homo sapiens GN=HPX PE=1 SV=2	SWPAVGNCSSALR	HexNAc(4)Hex(5)Fuc(1)NeuAc(2)	0.23	0.216
sp|P02790|HEMO_HUMAN Hemopexin OS=Homo sapiens GN=HPX PE=1 SV=2	ALPQPQNVTSLLGCTH	HexNAc(9)Hex(3)Fuc(1)		0.267
sp|P02790|HEMO_HUMAN Hemopexin OS=Homo sapiens GN=HPX PE=1 SV=2	ALPQPQNVTSLLGCTH	HexNAc(3)Hex(4)NeuAc(1)	0.309	0.341
sp|P02790|HEMO_HUMAN Hemopexin OS=Homo sapiens GN=HPX PE=1 SV=2	ALPQPQNVTSLLGCTH	HexNAc(5)Hex(6)NeuAc(1)	0.31	0.275
sp|P02790|HEMO_HUMAN Hemopexin OS=Homo sapiens GN=HPX PE=1 SV=2	ALPQPQNVTSLLGCTH	HexNAc(5)Hex(6)Fuc(1)NeuAc(3)	0.372	0.408
sp|P02790|HEMO_HUMAN Hemopexin OS=Homo sapiens GN=HPX PE=1 SV=2	ALPQPQNVTSLLGCTH	HexNAc(5)Hex(6)NeuAc(2)	0.395	0.485
sp|P02790|HEMO_HUMAN Hemopexin OS=Homo sapiens GN=HPX PE=1 SV=2	ALPQPQNVTSLLGCTH	HexNAc(5)Hex(6)Fuc(2)NeuAc(2)		0.57
sp|P02790|HEMO_HUMAN Hemopexin OS=Homo sapiens GN=HPX PE=1 SV=2	ALPQPQNVTSLLGCTH	HexNAc(5)Hex(6)NeuAc(3)	1.06	1.03
sp|P02790|HEMO_HUMAN Hemopexin OS=Homo sapiens GN=HPX PE=1 SV=2	SWPAVGNCSSALR	HexNAc(4)Hex(5)NeuAc(2)	1.11	1.08
sp|P02790|HEMO_HUMAN Hemopexin OS=Homo sapiens GN=HPX PE=1 SV=2	ALPQPQNVTSLLGCTH	HexNAc(4)Hex(5)Fuc(1)NeuAc(1)	1.28	1.03
sp|P02790|HEMO_HUMAN Hemopexin OS=Homo sapiens GN=HPX PE=1 SV=2	ALPQPQNVTSLLGCTH	HexNAc(4)Hex(5)Fuc(1)NeuAc(2)	1.69	1.49
sp|P02790|HEMO_HUMAN Hemopexin OS=Homo sapiens GN=HPX PE=1 SV=2	ALPQPQNVTSLLGCTH	HexNAc(4)Hex(5)NeuAc(2)	47.1	46.3
sp|P02790|HEMO_HUMAN Hemopexin OS=Homo sapiens GN=HPX PE=1 SV=2	ALPQPQNVTSLLGCTH	HexNAc(4)Hex(5)NeuAc(1)	6.68	5.69
sp|P03952|KLKB1_HUMAN Plasma kallikrein OS=Homo sapiens GN=KLKB1 PE=1 SV=1	IYSGILNLSDITK	HexNAc(4)Hex(5)NeuAc(1)	0.095	0.122
sp|P03952|KLKB1_HUMAN Plasma kallikrein OS=Homo sapiens GN=KLKB1 PE=1 SV=1	LQAPLNYTEFQKPICLPSK	HexNAc(4)Hex(5)NeuAc(2)	0.11
sp|P03952|KLKB1_HUMAN Plasma kallikrein OS=Homo sapiens GN=KLKB1 PE=1 SV=1	IYSGILNLSDITK	HexNAc(4)Hex(5)Fuc(2)NeuAc(1)	0.2
sp|P03952|KLKB1_HUMAN Plasma kallikrein OS=Homo sapiens GN=KLKB1 PE=1 SV=1	IYSGILNLSDITK	HexNAc(4)Hex(5)NeuAc(2)	0.329	0.421
sp|P04004|VTNC_HUMAN Vitronectin OS=Homo sapiens GN=VTN PE=1 SV=1	NGSLFAFR	HexNAc(2)Hex(4)		0.0294
sp|P04004|VTNC_HUMAN Vitronectin OS=Homo sapiens GN=VTN PE=1 SV=1	NGSLFAFR	HexNAc(3)Hex(5)		0.0428
sp|P04004|VTNC_HUMAN Vitronectin OS=Homo sapiens GN=VTN PE=1 SV=1	NGSLFAFR	HexNAc(3)Hex(6)NeuAc(1)	0.141
sp|P04004|VTNC_HUMAN Vitronectin OS=Homo sapiens GN=VTN PE=1 SV=1	NGSLFAFR	HexNAc(4)Hex(5)NeuAc(1)	0.441	0.439
sp|P04004|VTNC_HUMAN Vitronectin OS=Homo sapiens GN=VTN PE=1 SV=1	NGSLFAFR	HexNAc(3)Hex(4)NeuAc(1)	0.522	0.418
sp|P04004|VTNC_HUMAN Vitronectin OS=Homo sapiens GN=VTN PE=1 SV=1	NGSLFAFR	HexNAc(4)Hex(5)NeuAc(2)	1.36	1.3
sp|P04004|VTNC_HUMAN Vitronectin OS=Homo sapiens GN=VTN PE=1 SV=1	NGSLFAFR	HexNAc(3)Hex(5)NeuAc(1)	3.15	2.67
sp|P04114|APOB_HUMAN Apolipoprotein B-100 OS=Homo sapiens GN=APOB PE=1 SV=2	FVEGSHNSTVSLTTK	HexNAc(2)Hex(7)		0.00231
sp|P04114|APOB_HUMAN Apolipoprotein B-100 OS=Homo sapiens GN=APOB PE=1 SV=2	FVEGSHNSTVSLTTK	HexNAc(4)Hex(5)Fuc(1)NeuAc(1)		0.00387
sp|P04114|APOB_HUMAN Apolipoprotein B-100 OS=Homo sapiens GN=APOB PE=1 SV=2	FVEGSHNSTVSLTTK	HexNAc(4)Hex(5)	0.00648	0.00474
sp|P04114|APOB_HUMAN Apolipoprotein B-100 OS=Homo sapiens GN=APOB PE=1 SV=2	FVEGSHNSTVSLTTK	HexNAc(3)Hex(6)	0.0101	0.00689
sp|P04114|APOB_HUMAN Apolipoprotein B-100 OS=Homo sapiens GN=APOB PE=1 SV=2	FVEGSHNSTVSLTTK	HexNAc(3)Hex(5)	0.0125	0.00898
sp|P04114|APOB_HUMAN Apolipoprotein B-100 OS=Homo sapiens GN=APOB PE=1 SV=2	FVEGSHNSTVSLTTK	HexNAc(3)Hex(4)NeuAc(1)	0.0139	0.0103
sp|P04114|APOB_HUMAN Apolipoprotein B-100 OS=Homo sapiens GN=APOB PE=1 SV=2	FVEGSHNSTVSLTTK	HexNAc(3)Hex(6)NeuAc(1)	0.0211	0.0209
sp|P04114|APOB_HUMAN Apolipoprotein B-100 OS=Homo sapiens GN=APOB PE=1 SV=2	FVEGSHNSTVSLTTK	HexNAc(2)Hex(5)	0.0266	0.0191
sp|P04114|APOB_HUMAN Apolipoprotein B-100 OS=Homo sapiens GN=APOB PE=1 SV=2	FNSSYLQGTNQITGR	HexNAc(4)Hex(5)NeuAc(1)	0.0278
sp|P04114|APOB_HUMAN Apolipoprotein B-100 OS=Homo sapiens GN=APOB PE=1 SV=2	FVEGSHNSTVSLTTK	HexNAc(4)Hex(5)NeuAc(1)	0.0936	0.0789
sp|P04114|APOB_HUMAN Apolipoprotein B-100 OS=Homo sapiens GN=APOB PE=1 SV=2	FVEGSHNSTVSLTTK	HexNAc(3)Hex(5)NeuAc(1)	0.125	0.0784
sp|P04196|HRG_HUMAN Histidine-rich glycoprotein OS=Homo sapiens GN=HRG PE=1 SV=1	VIDFNCTTSSVSSALANTK	HexNAc(4)Hex(5)NeuAc(1)	0.198
sp|P04196|HRG_HUMAN Histidine-rich glycoprotein OS=Homo sapiens GN=HRG PE=1 SV=1	VIDFNCTTSSVSSALANTK	HexNAc(4)Hex(5)NeuAc(2)	0.367	0.274
sp|P05155|IC1_HUMAN Plasma protease C1 inhibitor OS=Homo sapiens GN=SERPING1 PE=1 SV=2	DTFVNASR	HexNAc(4)Hex(5)NeuAc(2)	0.0267	0.0183
sp|P05155|IC1_HUMAN Plasma protease C1 inhibitor OS=Homo sapiens GN=SERPING1 PE=1 SV=2	VLSNNSDANLELINTWVAK	HexNAc(4)Hex(5)Fuc(1)NeuAc(2)	0.108	0.11
sp|P05155|IC1_HUMAN Plasma protease C1 inhibitor OS=Homo sapiens GN=SERPING1 PE=1 SV=2	VLSNNSDANLELINTWVAK	HexNAc(4)Hex(5)NeuAc(2)	0.124
sp|P05156|CFAI_HUMAN Complement factor I OS=Homo sapiens GN=CFI PE=1 SV=2	LISNCSK	HexNAc(4)Hex(5)NeuAc(2)	0.00801	0.00581
sp|P05156|CFAI_HUMAN Complement factor I OS=Homo sapiens GN=CFI PE=1 SV=2	FLNNGTCTAEGK	HexNAc(4)Hex(5)NeuAc(2)	0.012
sp|P05543|THBG_HUMAN Thyroxine-binding globulin OS=Homo sapiens GN=SERPINA7 PE=1 SV=2	VTACHSSQPNATLYK	HexNAc(4)Hex(5)NeuAc(2)	0.0294	0.0144
sp|P05546|HEP2_HUMAN Heparin cofactor 2 OS=Homo sapiens GN=SERPIND1 PE=1 SV=3	NLSMPLLPADFHK	HexNAc(5)Hex(5)Fuc(1)NeuAc(1)	0.00924
sp|P05546|HEP2_HUMAN Heparin cofactor 2 OS=Homo sapiens GN=SERPIND1 PE=1 SV=3	DFVNASSK	HexNAc(4)Hex(5)NeuAc(2)	0.0109
sp|P05546|HEP2_HUMAN Heparin cofactor 2 OS=Homo sapiens GN=SERPIND1 PE=1 SV=3	NLSMPLLPADFHK	HexNAc(4)Hex(6)Fuc(1)		0.0199
sp|P05546|HEP2_HUMAN Heparin cofactor 2 OS=Homo sapiens GN=SERPIND1 PE=1 SV=3	NLSMPLLPADFHK	HexNAc(3)Hex(4)NeuAc(1)		0.0359
sp|P05546|HEP2_HUMAN Heparin cofactor 2 OS=Homo sapiens GN=SERPIND1 PE=1 SV=3	NLSMPLLPADFHK	HexNAc(7)Hex(8)NeuAc(1)		0.0384
sp|P05546|HEP2_HUMAN Heparin cofactor 2 OS=Homo sapiens GN=SERPIND1 PE=1 SV=3	NLSMPLLPADFHK	HexNAc(5)Hex(6)Fuc(1)NeuAc(3)	0.0684	0.167
sp|P05546|HEP2_HUMAN Heparin cofactor 2 OS=Homo sapiens GN=SERPIND1 PE=1 SV=3	NLSMPLLPADFHK	HexNAc(5)Hex(6)NeuAc(3)	0.169	0.224
sp|P05546|HEP2_HUMAN Heparin cofactor 2 OS=Homo sapiens GN=SERPIND1 PE=1 SV=3	NLSMPLLPADFHK	HexNAc(4)Hex(5)Fuc(1)NeuAc(2)	0.839	0.585
sp|P05546|HEP2_HUMAN Heparin cofactor 2 OS=Homo sapiens GN=SERPIND1 PE=1 SV=3	NLSMPLLPADFHK	HexNAc(4)Hex(5)Fuc(2)NeuAc(1)		1.83
sp|P05546|HEP2_HUMAN Heparin cofactor 2 OS=Homo sapiens GN=SERPIND1 PE=1 SV=3	NLSMPLLPADFHK	HexNAc(4)Hex(5)NeuAc(2)	5.03	4.79
sp|P06681|CO2_HUMAN Complement C2 OS=Homo sapiens GN=C2 PE=1 SV=2	QSVPAHFVALNGSK	HexNAc(2)Hex(4)	0.0161
sp|P06681|CO2_HUMAN Complement C2 OS=Homo sapiens GN=C2 PE=1 SV=2	QSVPAHFVALNGSK	HexNAc(3)Hex(6)NeuAc(1)		0.018
sp|P06681|CO2_HUMAN Complement C2 OS=Homo sapiens GN=C2 PE=1 SV=2	QSVPAHFVALNGSK	HexNAc(3)Hex(5)NeuAc(1)	0.0183	0.00796
sp|P06681|CO2_HUMAN Complement C2 OS=Homo sapiens GN=C2 PE=1 SV=2	QSVPAHFVALNGSK	HexNAc(3)Hex(6)	0.042
sp|P06681|CO2_HUMAN Complement C2 OS=Homo sapiens GN=C2 PE=1 SV=2	QSVPAHFVALNGSK	HexNAc(2)Hex(8)	0.219	0.216
sp|P06681|CO2_HUMAN Complement C2 OS=Homo sapiens GN=C2 PE=1 SV=2	QSVPAHFVALNGSK	HexNAc(2)Hex(5)	1.54	1.12
sp|P06681|CO2_HUMAN Complement C2 OS=Homo sapiens GN=C2 PE=1 SV=2	QSVPAHFVALNGSK	HexNAc(2)Hex(7)	1.54	1.44
sp|P06681|CO2_HUMAN Complement C2 OS=Homo sapiens GN=C2 PE=1 SV=2	QSVPAHFVALNGSK	HexNAc(2)Hex(6)	2.96	2.02
sp|P08603|CFAH_HUMAN Complement factor H OS=Homo sapiens GN=CFH PE=1 SV=4	ISEENETTCYMGK	HexNAc(4)Hex(5)Fuc(2)NeuAc(1)	0.00333
sp|P08603|CFAH_HUMAN Complement factor H OS=Homo sapiens GN=CFH PE=1 SV=4	ISEENETTCYMGK	HexNAc(4)Hex(5)NeuAc(2)		0.00505
sp|P08603|CFAH_HUMAN Complement factor H OS=Homo sapiens GN=CFH PE=1 SV=4	MDGASNVTCINSR	HexNAc(4)Hex(5)NeuAc(2)	0.00511	0.0103
sp|P08603|CFAH_HUMAN Complement factor H OS=Homo sapiens GN=CFH PE=1 SV=4	IPCSQPPQIEHGTINSSR	HexNAc(4)Hex(5)Fuc(2)NeuAc(1)		0.024
sp|P08603|CFAH_HUMAN Complement factor H OS=Homo sapiens GN=CFH PE=1 SV=4	IPCSQPPQIEHGTINSSR	HexNAc(4)Hex(5)NeuAc(2)	0.147	0.0443
sp|P10643|CO7_HUMAN Complement component C7 OS=Homo sapiens GN=C7 PE=1 SV=2	INNDFNYEFYNSTWSYVK	HexNAc(2)Hex(5)	0.0973	0.0708
sp|P11279|LAMP1_HUMAN Lysosome-associated membrane glycoprotein 1 OS=Homo sapiens GN=LAMP1 PE=1 SV=3	GHTLTLNFTR	HexNAc(3)Hex(6)NeuAc(1)	0.0166
sp|P11279|LAMP1_HUMAN Lysosome-associated membrane glycoprotein 1 OS=Homo sapiens GN=LAMP1 PE=1 SV=3	GHTLTLNFTR	HexNAc(2)Hex(5)		0.0225
sp|P19823|ITIH2_HUMAN Inter-alpha-trypsin inhibitor heavy chain H2 OS=Homo sapiens GN=ITIH2 PE=1 SV=2	VVNNSPQPQNVVFDVQIPK	HexNAc(4)Hex(5)Fuc(2)NeuAc(1)		0.00398
sp|P19823|ITIH2_HUMAN Inter-alpha-trypsin inhibitor heavy chain H2 OS=Homo sapiens GN=ITIH2 PE=1 SV=2	GAFISNFSMTVDGK	HexNAc(4)Hex(5)NeuAc(1)	0.0822
sp|P19823|ITIH2_HUMAN Inter-alpha-trypsin inhibitor heavy chain H2 OS=Homo sapiens GN=ITIH2 PE=1 SV=2	GAFISNFSMTVDGK	HexNAc(4)Hex(5)NeuAc(2)	0.0995	0.199
sp|P22792|CPN2_HUMAN Carboxypeptidase N subunit 2 OS=Homo sapiens GN=CPN2 PE=1 SV=3	AFGSNPNLTK	HexNAc(4)Hex(5)Fuc(2)NeuAc(1)	0.00107
sp|P22792|CPN2_HUMAN Carboxypeptidase N subunit 2 OS=Homo sapiens GN=CPN2 PE=1 SV=3	AFGSNPNLTK	HexNAc(4)Hex(5)NeuAc(2)		0.00893
sp|P27169|PON1_HUMAN Serum paraoxonase/arylesterase 1 OS=Homo sapiens GN=PON1 PE=1 SV=3	HANWTLTPLK	HexNAc(4)Hex(5)NeuAc(1)		0.0296
sp|P27169|PON1_HUMAN Serum paraoxonase/arylesterase 1 OS=Homo sapiens GN=PON1 PE=1 SV=3	HANWTLTPLK	HexNAc(3)Hex(5)NeuAc(1)		0.0342
sp|P27169|PON1_HUMAN Serum paraoxonase/arylesterase 1 OS=Homo sapiens GN=PON1 PE=1 SV=3	HANWTLTPLK	HexNAc(4)Hex(5)NeuAc(2)	0.0883	0.0406
sp|P27918|PROP_HUMAN Properdin OS=Homo sapiens GN=CFP PE=1 SV=2	NVTFWGR	HexNAc(4)Hex(5)Fuc(1)NeuAc(1)	0.0417
sp|P33151|CADH5_HUMAN Cadherin-5 OS=Homo sapiens GN=CDH5 PE=1 SV=5	DWIWNQMHIDEEKNTSLPHHVGK	HexNAc(4)Hex(5)Fuc(1)NeuAc(2)	0.0904
sp|P41222|PTGDS_HUMAN Prostaglandin-H2 D-isomerase OS=Homo sapiens GN=PTGDS PE=1 SV=1	SVVAPATDGGLNLTSTFLR	HexNAc(4)Hex(5)Fuc(1)NeuAc(2)		0.0162
sp|P43652|AFAM_HUMAN Afamin OS=Homo sapiens GN=AFM PE=1 SV=1	YAEDKFNETTEK	HexNAc(4)Hex(5)Fuc(2)NeuAc(1)		0.00968
sp|P43652|AFAM_HUMAN Afamin OS=Homo sapiens GN=AFM PE=1 SV=1	ICAMEGLPQKHNFSHCCSK	HexNAc(5)Hex(5)Fuc(1)NeuAc(1)	0.0125
sp|P43652|AFAM_HUMAN Afamin OS=Homo sapiens GN=AFM PE=1 SV=1	DIENFNSTQK	HexNAc(4)Hex(5)NeuAc(2)	0.0133
sp|P43652|AFAM_HUMAN Afamin OS=Homo sapiens GN=AFM PE=1 SV=1	YAEDKFNETTEK	HexNAc(4)Hex(5)NeuAc(2)	0.018	0.014
sp|P51884|LUM_HUMAN Lumican OS=Homo sapiens GN=LUM PE=1 SV=2	LHINHNNLTESVGPLPK	HexNAc(6)Hex(7)Fuc(2)NeuAc(3)		0
sp|P51884|LUM_HUMAN Lumican OS=Homo sapiens GN=LUM PE=1 SV=2	LHINHNNLTESVGPLPK	HexNAc(6)Hex(7)Fuc(1)NeuAc(1)		0.0128
sp|P51884|LUM_HUMAN Lumican OS=Homo sapiens GN=LUM PE=1 SV=2	LHINHNNLTESVGPLPK	HexNAc(6)Hex(7)	0.0203
sp|P51884|LUM_HUMAN Lumican OS=Homo sapiens GN=LUM PE=1 SV=2	KLHINHNNLTESVGPLPK	HexNAc(5)Hex(5)Fuc(1)NeuAc(1)	0.0243
sp|P51884|LUM_HUMAN Lumican OS=Homo sapiens GN=LUM PE=1 SV=2	LHINHNNLTESVGPLPK	HexNAc(4)Hex(5)NeuAc(1)	0.0252
sp|P51884|LUM_HUMAN Lumican OS=Homo sapiens GN=LUM PE=1 SV=2	LHINHNNLTESVGPLPK	HexNAc(5)Hex(6)Fuc(1)NeuAc(2)	0.0335
sp|P51884|LUM_HUMAN Lumican OS=Homo sapiens GN=LUM PE=1 SV=2	LHINHNNLTESVGPLPK	HexNAc(5)Hex(6)Fuc(1)	0.0552
sp|P51884|LUM_HUMAN Lumican OS=Homo sapiens GN=LUM PE=1 SV=2	KLHINHNNLTESVGPLPK	HexNAc(5)Hex(5)Fuc(1)		0.0585
sp|P51884|LUM_HUMAN Lumican OS=Homo sapiens GN=LUM PE=1 SV=2	KLHINHNNLTESVGPLPK	HexNAc(6)Hex(7)Fuc(1)NeuAc(1)	0.0723
sp|P51884|LUM_HUMAN Lumican OS=Homo sapiens GN=LUM PE=1 SV=2	KLHINHNNLTESVGPLPK	HexNAc(7)Hex(8)Fuc(1)NeuAc(1)	0.073	0.0641
sp|P51884|LUM_HUMAN Lumican OS=Homo sapiens GN=LUM PE=1 SV=2	KLHINHNNLTESVGPLPK	HexNAc(4)Hex(5)Fuc(1)	0.078
sp|P51884|LUM_HUMAN Lumican OS=Homo sapiens GN=LUM PE=1 SV=2	LHINHNNLTESVGPLPK	HexNAc(4)Hex(5)Fuc(1)NeuAc(2)	0.0842	0.0878
sp|P51884|LUM_HUMAN Lumican OS=Homo sapiens GN=LUM PE=1 SV=2	LHINHNNLTESVGPLPK	HexNAc(5)Hex(6)Fuc(2)NeuAc(3)	0.102
sp|P51884|LUM_HUMAN Lumican OS=Homo sapiens GN=LUM PE=1 SV=2	KLHINHNNLTESVGPLPK	HexNAc(5)Hex(6)Fuc(1)NeuAc(2)	0.102	0.0631
sp|P51884|LUM_HUMAN Lumican OS=Homo sapiens GN=LUM PE=1 SV=2	LHINHNNLTESVGPLPK	HexNAc(5)Hex(5)Fuc(1)	0.124	0.087
sp|P51884|LUM_HUMAN Lumican OS=Homo sapiens GN=LUM PE=1 SV=2	LHINHNNLTESVGPLPK	HexNAc(4)Hex(5)Fuc(1)	0.131	0.134
sp|P51884|LUM_HUMAN Lumican OS=Homo sapiens GN=LUM PE=1 SV=2	LHINHNNLTESVGPLPK	HexNAc(5)Hex(6)Fuc(1)NeuAc(1)	0.136	0.213
sp|P51884|LUM_HUMAN Lumican OS=Homo sapiens GN=LUM PE=1 SV=2	KLHINHNNLTESVGPLPK	HexNAc(4)Hex(5)Fuc(1)NeuAc(2)	0.19	0.141
sp|P51884|LUM_HUMAN Lumican OS=Homo sapiens GN=LUM PE=1 SV=2	KLHINHNNLTESVGPLPK	HexNAc(5)Hex(6)Fuc(1)NeuAc(1)	0.358	0.217
sp|P51884|LUM_HUMAN Lumican OS=Homo sapiens GN=LUM PE=1 SV=2	KLHINHNNLTESVGPLPK	HexNAc(4)Hex(5)Fuc(1)NeuAc(1)	0.625	0.0739
sp|P51884|LUM_HUMAN Lumican OS=Homo sapiens GN=LUM PE=1 SV=2	LHINHNNLTESVGPLPK	HexNAc(4)Hex(5)Fuc(1)NeuAc(1)	0.754	0.646
sp|P80108|PHLD_HUMAN Phosphatidylinositol-glycan-specific phospholipase D OS=Homo sapiens GN=GPLD1 PE=1 SV=3	LGTSLSSGHVLMNGTLK	HexNAc(4)Hex(5)NeuAc(2)		0.037
sp|P80108|PHLD_HUMAN Phosphatidylinositol-glycan-specific phospholipase D OS=Homo sapiens GN=GPLD1 PE=1 SV=3	LGTSLSSGHVLMNGTLK	HexNAc(4)Hex(5)NeuAc(1)	0.0638
sp|Q10588|BST1_HUMAN ADP-ribosyl cyclase/cyclic ADP-ribose hydrolase 2 OS=Homo sapiens GN=BST1 PE=1 SV=2	DSSGVIHVMLNGSEPTGAYPIK	HexNAc(2)Hex(6)	0.099	0.0472
sp|Q13822|ENPP2_HUMAN Ectonucleotide pyrophosphatase/phosphodiesterase family member 2 OS=Homo sapiens GN=ENPP2 PE=1 SV=3	PAPNNGTHGSLNHLLR	HexNAc(2)Hex(9)	0.0127	0.00899
sp|Q16610|ECM1_HUMAN Extracellular matrix protein 1 OS=Homo sapiens GN=ECM1 PE=1 SV=2	HIPGLIHNMTAR	HexNAc(5)Hex(6)Fuc(1)NeuAc(2)	0.00821	0.00682
sp|Q16610|ECM1_HUMAN Extracellular matrix protein 1 OS=Homo sapiens GN=ECM1 PE=1 SV=2	HIPGLIHNMTAR	HexNAc(4)Hex(5)Fuc(1)NeuAc(1)	0.0131
sp|Q16610|ECM1_HUMAN Extracellular matrix protein 1 OS=Homo sapiens GN=ECM1 PE=1 SV=2	HIPGLIHNMTAR	HexNAc(4)Hex(5)Fuc(1)NeuAc(2)	0.471	0.395
sp|Q92954|PRG4_HUMAN Proteoglycan 4 OS=Homo sapiens GN=PRG4 PE=1 SV=2	PVDGLTTLR		0.0697	0.0418
sp|Q96KN2|CNDP1_HUMAN Beta-Ala-His dipeptidase OS=Homo sapiens GN=CNDP1 PE=1 SV=4	LVPHMNVSAVEK	HexNAc(6)Hex(8)NeuAc(1)	0.0477
sp|Q96PD5|PGRP2_HUMAN N-acetylmuramoyl-L-alanine amidase OS=Homo sapiens GN=PGLYRP2 PE=1 SV=1	LEPVHLQLQCMSQEQLAQVAANATK	HexNAc(4)Hex(5)NeuAc(2)		0.0469
sp|Q96PD5|PGRP2_HUMAN N-acetylmuramoyl-L-alanine amidase OS=Homo sapiens GN=PGLYRP2 PE=1 SV=1	LEPVHLQLQCMSQEQLAQVAANATK	HexNAc(5)Hex(5)Fuc(1)NeuAc(1)	0.0578
sp|Q9NZP8|C1RL_HUMAN Complement C1r subcomponent-like protein OS=Homo sapiens GN=C1RL PE=1 SV=2	KNQSVNVFLGHTAIDEMLK	HexNAc(4)Hex(5)NeuAc(2)	0.0769	0.0355
sp|Q9UGM5|FETUB_HUMAN Fetuin-B OS=Homo sapiens GN=FETUB PE=1 SV=2	VLYLAAYNCTLRPVSK	HexNAc(4)Hex(5)Fuc(2)NeuAc(1)	0.0773
sp|Q9UGM5|FETUB_HUMAN Fetuin-B OS=Homo sapiens GN=FETUB PE=1 SV=2	VLYLAAYNCTLRPVSK	HexNAc(4)Hex(5)NeuAc(2)	0.101	0.067
sp|Q9Y6R7|FCGBP_HUMAN IgGFc-binding protein OS=Homo sapiens GN=FCGBP PE=1 SV=3	VVTVAALGTNISIHKDEIGK	HexNAc(4)Hex(5)NeuAc(1)		0.0149
Note: the numbers from column D and E correspond to the percentage of the indivdual glyopeptides from the whole column (one injection).

## Sheet: Fraction6+7+8
Table S2. N-glycopeptides identified in each fraction in the pooled cirrhosis samples
Fraction 6+7+8
			Cirrhosis_Fc678Ar1(%)	Cirrhosis_F678Ar2(%)
Protein\nname	Sequence\n(unformatted)	Glycans
sp|O75882|ATRN_HUMAN Attractin OS=Homo sapiens GN=ATRN PE=1 SV=2	VFHIHNESWVLLTPK	HexNAc(2)Hex(3)		0.0706
sp|O75882|ATRN_HUMAN Attractin OS=Homo sapiens GN=ATRN PE=1 SV=2	YNWSFIHCPACQCNGHSK	HexNAc(2)Hex(5)	0.0971	0.0958
sp|O75882|ATRN_HUMAN Attractin OS=Homo sapiens GN=ATRN PE=1 SV=2	VFHIHNESWVLLTPK	HexNAc(3)Hex(6)NeuAc(1)	0.11
sp|O75882|ATRN_HUMAN Attractin OS=Homo sapiens GN=ATRN PE=1 SV=2	VFHIHNESWVLLTPK	HexNAc(3)Hex(6)	0.116	0.0758
sp|O75882|ATRN_HUMAN Attractin OS=Homo sapiens GN=ATRN PE=1 SV=2	VFHIHNESWVLLTPK	HexNAc(2)Hex(4)	0.229
sp|O75882|ATRN_HUMAN Attractin OS=Homo sapiens GN=ATRN PE=1 SV=2	VFHIHNESWVLLTPK	HexNAc(2)Hex(7)	0.245	0.214
sp|O75882|ATRN_HUMAN Attractin OS=Homo sapiens GN=ATRN PE=1 SV=2	VFHIHNESWVLLTPK	HexNAc(2)Hex(5)	1.84	1.89
sp|P00450|CERU_HUMAN Ceruloplasmin OS=Homo sapiens GN=CP PE=1 SV=1	EHEGAIYPDNTTDFQR	HexNAc(4)Hex(5)NeuAc(2)	0
sp|P00450|CERU_HUMAN Ceruloplasmin OS=Homo sapiens GN=CP PE=1 SV=1	EHEGAIYPDNTTDFQR	HexNAc(4)Hex(5)Fuc(1)NeuAc(2)	0.0125	0.0289
sp|P00450|CERU_HUMAN Ceruloplasmin OS=Homo sapiens GN=CP PE=1 SV=1	ELHHLQEQNVSNAFLDK	HexNAc(5)Hex(6)Fuc(1)NeuAc(3)		0.0237
sp|P00450|CERU_HUMAN Ceruloplasmin OS=Homo sapiens GN=CP PE=1 SV=1	AGLQAFFQVQECNK	HexNAc(1)	0.0276
sp|P00450|CERU_HUMAN Ceruloplasmin OS=Homo sapiens GN=CP PE=1 SV=1	AGLQAFFQVQECNK	HexNAc(4)Hex(5)NeuAc(2)	0.106	0.153
sp|P00450|CERU_HUMAN Ceruloplasmin OS=Homo sapiens GN=CP PE=1 SV=1	ELHHLQEQNVSNAFLDK	HexNAc(4)Hex(5)Fuc(1)NeuAc(2)	0.158	0.293
sp|P00450|CERU_HUMAN Ceruloplasmin OS=Homo sapiens GN=CP PE=1 SV=1	ELHHLQEQNVSNAFLDK	HexNAc(4)Hex(5)NeuAc(2)	0.89	0.964
sp|P00734|THRB_HUMAN Prothrombin OS=Homo sapiens GN=F2 PE=1 SV=2	YPHKPEINSTTHPGADLQENFCR	HexNAc(4)Hex(5)NeuAc(2)	1.01	0.0436
sp|P00738|HPT_HUMAN Haptoglobin OS=Homo sapiens GN=HP PE=1 SV=1	VVLHPNYSQVDIGLIK	HexNAc(4)Hex(5)NeuAc(2)	0.143	0.0673
sp|P00738|HPT_HUMAN Haptoglobin OS=Homo sapiens GN=HP PE=1 SV=1	MVSHHNLTTGATLINEQWLLTTAK	HexNAc(4)Hex(5)NeuAc(2)	0.174	0.193
sp|P01008|ANT3_HUMAN Antithrombin-III OS=Homo sapiens GN=SERPINC1 PE=1 SV=1	LGACNDTLQQLMEVFK	HexNAc(4)Hex(7)NeuAc(1)	0.000226	0.00351
sp|P01008|ANT3_HUMAN Antithrombin-III OS=Homo sapiens GN=SERPINC1 PE=1 SV=1	LGACNDTLQQLMEVFK	HexNAc(4)Hex(5)Fuc(1)NeuAc(2)	0.00377
sp|P01008|ANT3_HUMAN Antithrombin-III OS=Homo sapiens GN=SERPINC1 PE=1 SV=1	LGACNDTLQQLMEVFK	HexNAc(3)Hex(4)NeuAc(1)		0.019
sp|P01008|ANT3_HUMAN Antithrombin-III OS=Homo sapiens GN=SERPINC1 PE=1 SV=1	AAINKWVSNK	HexNAc(4)Hex(5)Fuc(2)NeuAc(1)		0.0493
sp|P01008|ANT3_HUMAN Antithrombin-III OS=Homo sapiens GN=SERPINC1 PE=1 SV=1	AAINKWVSNKTEGR	HexNAc(4)Hex(5)NeuAc(2)	0.118	0.105
sp|P01008|ANT3_HUMAN Antithrombin-III OS=Homo sapiens GN=SERPINC1 PE=1 SV=1	LGACNDTLQQLMEVFK	HexNAc(4)Hex(6)Fuc(1)NeuAc(1)	0.242	0.426
sp|P01008|ANT3_HUMAN Antithrombin-III OS=Homo sapiens GN=SERPINC1 PE=1 SV=1	LGACNDTLQQLMEVFK	HexNAc(4)Hex(5)NeuAc(2)	0.859	1.36
sp|P01009|A1AT_HUMAN Alpha-1-antitrypsin OS=Homo sapiens GN=SERPINA1 PE=1 SV=3	YLGNATAIFFLPDEGK	HexNAc(4)Hex(5)Fuc(2)NeuAc(1)		0.03
sp|P01009|A1AT_HUMAN Alpha-1-antitrypsin OS=Homo sapiens GN=SERPINA1 PE=1 SV=3	YLGNATAIFFLPDEGK	HexNAc(4)Hex(5)NeuAc(2)	0.0608	0.0557
sp|P01011|AACT_HUMAN Alpha-1-antichymotrypsin OS=Homo sapiens GN=SERPINA3 PE=1 SV=2	KLINDYVKNGTR	HexNAc(4)Hex(5)NeuAc(1)	0.0101
sp|P01011|AACT_HUMAN Alpha-1-antichymotrypsin OS=Homo sapiens GN=SERPINA3 PE=1 SV=2	KLINDYVKNGTR	HexNAc(4)Hex(5)NeuAc(2)		0.0997
sp|P01011|AACT_HUMAN Alpha-1-antichymotrypsin OS=Homo sapiens GN=SERPINA3 PE=1 SV=2	LINDYVKNGTR	HexNAc(4)Hex(5)NeuAc(2)	0.217
sp|P01019|ANGT_HUMAN Angiotensinogen OS=Homo sapiens GN=AGT PE=1 SV=1	VYIHPFHLVIHNESTCEQLAK	HexNAc(4)Hex(5)NeuAc(1)	0.0165
sp|P01019|ANGT_HUMAN Angiotensinogen OS=Homo sapiens GN=AGT PE=1 SV=1	VYIHPFHLVIHNESTCEQLAK	HexNAc(4)Hex(5)NeuAc(2)		0.0305
sp|P01023|A2MG_HUMAN Alpha-2-macroglobulin OS=Homo sapiens GN=A2M PE=1 SV=3	VSNQTLSLFFTVLQDVPVR	HexNAc(4)Hex(5)Fuc(1)NeuAc(1)	0.0232	0.0222
sp|P01024|CO3_HUMAN Complement C3 OS=Homo sapiens GN=C3 PE=1 SV=2	TVLTPATNHMGNVTFTIPANR	HexNAc(3)Hex(4)Fuc(1)NeuAc(1)		0
sp|P01024|CO3_HUMAN Complement C3 OS=Homo sapiens GN=C3 PE=1 SV=2	TVLTPATNHMGNVTFTIPANR	HexNAc(3)Hex(5)		0.0343
sp|P01024|CO3_HUMAN Complement C3 OS=Homo sapiens GN=C3 PE=1 SV=2	TVLTPATNHMGNVTFTIPANR	HexNAc(1)	0.0534
sp|P01024|CO3_HUMAN Complement C3 OS=Homo sapiens GN=C3 PE=1 SV=2	TVLTPATNHMGNVTFTIPANR	HexNAc(2)Hex(3)	0.0578
sp|P01024|CO3_HUMAN Complement C3 OS=Homo sapiens GN=C3 PE=1 SV=2	TVLTPATNHMGNVTFTIPANREFK	HexNAc(2)Hex(7)	0.139
sp|P01024|CO3_HUMAN Complement C3 OS=Homo sapiens GN=C3 PE=1 SV=2	TVLTPATNHMGNVTFTIPANR	HexNAc(3)Hex(5)NeuAc(1)	0.22	0.126
sp|P01024|CO3_HUMAN Complement C3 OS=Homo sapiens GN=C3 PE=1 SV=2	TVLTPATNHMGNVTFTIPANR	HexNAc(2)Hex(4)	0.34	0.208
sp|P01024|CO3_HUMAN Complement C3 OS=Homo sapiens GN=C3 PE=1 SV=2	TVLTPATNHMGNVTFTIPANR	HexNAc(3)Hex(6)NeuAc(1)	0.357	0.357
sp|P01024|CO3_HUMAN Complement C3 OS=Homo sapiens GN=C3 PE=1 SV=2	TVLTPATNHMGNVTFTIPANREFK	HexNAc(2)Hex(6)	0.85
sp|P01024|CO3_HUMAN Complement C3 OS=Homo sapiens GN=C3 PE=1 SV=2	TVLTPATNHMGNVTFTIPANR	HexNAc(2)Hex(6)	53.9	50.7
sp|P01024|CO3_HUMAN Complement C3 OS=Homo sapiens GN=C3 PE=1 SV=2	TVLTPATNHMGNVTFTIPANR	HexNAc(2)Hex(7)	7.82	8.55
sp|P01024|CO3_HUMAN Complement C3 OS=Homo sapiens GN=C3 PE=1 SV=2	TVLTPATNHMGNVTFTIPANR	HexNAc(2)Hex(5)	9.91	8.45
sp|P01042|KNG1_HUMAN Kininogen-1 OS=Homo sapiens GN=KNG1 PE=1 SV=2	HGIQYFNNNTQHSSLFMLNEVK	HexNAc(6)Hex(5)Fuc(1)		0
sp|P01042|KNG1_HUMAN Kininogen-1 OS=Homo sapiens GN=KNG1 PE=1 SV=2	ITYSIVQTNCSK	HexNAc(4)Hex(5)NeuAc(2)	0.0908	0.121
sp|P01042|KNG1_HUMAN Kininogen-1 OS=Homo sapiens GN=KNG1 PE=1 SV=2	HGIQYFNNNTQHSSLFMLNEVK	HexNAc(6)Hex(4)NeuAc(1)	0.203
sp|P01042|KNG1_HUMAN Kininogen-1 OS=Homo sapiens GN=KNG1 PE=1 SV=2	HGIQYFNNNTQHSSLFMLNEVK	HexNAc(4)Hex(5)NeuAc(2)	0.298	0.115
sp|P01876|IGHA1_HUMAN Ig alpha-1 chain C region OS=Homo sapiens GN=IGHA1 PE=1 SV=2	PALEDLLLGSEANLTCTLTGLR	HexNAc(2)Hex(5)		0.0153
sp|P01876|IGHA1_HUMAN Ig alpha-1 chain C region OS=Homo sapiens GN=IGHA1 PE=1 SV=2	PALEDLLLGSEANLTCTLTGLR	HexNAc(5)Hex(4)NeuAc(1)	0.0243	0.0681
sp|P01876|IGHA1_HUMAN Ig alpha-1 chain C region OS=Homo sapiens GN=IGHA1 PE=1 SV=2	PALEDLLLGSEANLTCTLTGLR	HexNAc(5)Hex(4)	0.0314	0.0315
sp|P01876|IGHA1_HUMAN Ig alpha-1 chain C region OS=Homo sapiens GN=IGHA1 PE=1 SV=2	PALEDLLLGSEANLTCTLTGLR	HexNAc(5)Hex(5)NeuAc(1)	0.0394	0.0797
sp|P01876|IGHA1_HUMAN Ig alpha-1 chain C region OS=Homo sapiens GN=IGHA1 PE=1 SV=2	PALEDLLLGSEANLTCTLTGLR	HexNAc(5)Hex(3)	0.0419	0.0585
sp|P01876|IGHA1_HUMAN Ig alpha-1 chain C region OS=Homo sapiens GN=IGHA1 PE=1 SV=2	PALEDLLLGSEANLTCTLTGLR	HexNAc(4)Hex(5)NeuAc(1)	0.0516	0.09
sp|P01877|IGHA2_HUMAN Ig alpha-2 chain C region OS=Homo sapiens GN=IGHA2 PE=1 SV=3	TPLTANITK	HexNAc(5)Hex(3)Fuc(1)		0.00947
sp|P01877|IGHA2_HUMAN Ig alpha-2 chain C region OS=Homo sapiens GN=IGHA2 PE=1 SV=3	TPLTANITK	HexNAc(5)Hex(4)Fuc(1)	0.0326	0.0357
sp|P01877|IGHA2_HUMAN Ig alpha-2 chain C region OS=Homo sapiens GN=IGHA2 PE=1 SV=3	TPLTANITK	HexNAc(5)Hex(5)Fuc(1)	0.0362	0.0289
sp|P01877|IGHA2_HUMAN Ig alpha-2 chain C region OS=Homo sapiens GN=IGHA2 PE=1 SV=3	TPLTANITK	HexNAc(4)Hex(5)Fuc(1)NeuAc(1)	0.0425	0.0522
sp|P01877|IGHA2_HUMAN Ig alpha-2 chain C region OS=Homo sapiens GN=IGHA2 PE=1 SV=3	TPLTANITK	HexNAc(5)Hex(5)Fuc(1)NeuAc(1)	0.0721	0.087
sp|P02749|APOH_HUMAN Beta-2-glycoprotein 1 OS=Homo sapiens GN=APOH PE=1 SV=3	LGNWSAMPSCK	HexNAc(4)Hex(5)Fuc(1)NeuAc(1)	0.0226	0.0312
sp|P02749|APOH_HUMAN Beta-2-glycoprotein 1 OS=Homo sapiens GN=APOH PE=1 SV=3	VYKPSAGNNSLYR	HexNAc(5)Hex(6)Fuc(1)NeuAc(3)		0.0364
sp|P02749|APOH_HUMAN Beta-2-glycoprotein 1 OS=Homo sapiens GN=APOH PE=1 SV=3	LGNWSAMPSCK	HexNAc(4)Hex(5)NeuAc(1)	0.27	0.556
sp|P02749|APOH_HUMAN Beta-2-glycoprotein 1 OS=Homo sapiens GN=APOH PE=1 SV=3	LGNWSAMPSCK	HexNAc(4)Hex(5)NeuAc(2)	0.52	0.658
sp|P02749|APOH_HUMAN Beta-2-glycoprotein 1 OS=Homo sapiens GN=APOH PE=1 SV=3	VYKPSAGNNSLYR	HexNAc(4)Hex(5)Fuc(1)NeuAc(2)	0.587	0.648
sp|P02749|APOH_HUMAN Beta-2-glycoprotein 1 OS=Homo sapiens GN=APOH PE=1 SV=3	VYKPSAGNNSLYR	HexNAc(4)Hex(5)NeuAc(2)	1.31	1.31
sp|P02750|A2GL_HUMAN Leucine-rich alpha-2-glycoprotein OS=Homo sapiens GN=LRG1 PE=1 SV=2	KLPPGLLANFTLLR	HexNAc(4)Hex(5)Fuc(1)NeuAc(2)	0.0373
sp|P02750|A2GL_HUMAN Leucine-rich alpha-2-glycoprotein OS=Homo sapiens GN=LRG1 PE=1 SV=2	LPPGLLANFTLLR	HexNAc(4)Hex(5)NeuAc(2)	0.294	0.372
sp|P02750|A2GL_HUMAN Leucine-rich alpha-2-glycoprotein OS=Homo sapiens GN=LRG1 PE=1 SV=2	KLPPGLLANFTLLR	HexNAc(4)Hex(5)NeuAc(2)	0.987	1.41
sp|P02765|FETUA_HUMAN Alpha-2-HS-glycoprotein OS=Homo sapiens GN=AHSG PE=1 SV=1	KVCQDCPLLAPLNDTR	HexNAc(4)Hex(5)NeuAc(2)	0.0493
sp|P02787|TRFE_HUMAN Serotransferrin OS=Homo sapiens GN=TF PE=1 SV=3	CGLVPVLAENYNK	HexNAc(4)Hex(5)NeuAc(2)	0.0167
sp|P02787|TRFE_HUMAN Serotransferrin OS=Homo sapiens GN=TF PE=1 SV=3	QQQHLFGSNVTDCSGNFCLFR	HexNAc(2)Hex(11)	0.0596	0.0857
sp|P02787|TRFE_HUMAN Serotransferrin OS=Homo sapiens GN=TF PE=1 SV=3	QQQHLFGSNVTDCSGNFCLFR	HexNAc(4)Hex(5)Fuc(1)NeuAc(2)		0.193
sp|P02787|TRFE_HUMAN Serotransferrin OS=Homo sapiens GN=TF PE=1 SV=3	QQQHLFGSNVTDCSGNFCLFR	HexNAc(4)Hex(6)Fuc(1)NeuAc(1)	0.71	0.605
sp|P02787|TRFE_HUMAN Serotransferrin OS=Homo sapiens GN=TF PE=1 SV=3	QQQHLFGSNVTDCSGNFCLFR	HexNAc(4)Hex(5)NeuAc(2)	0.854	1.24
sp|P02790|HEMO_HUMAN Hemopexin OS=Homo sapiens GN=HPX PE=1 SV=2	CSDGWSFDATTLDDNGTMLFFK	HexNAc(2)Hex(11)	0.00726	0.0122
sp|P02790|HEMO_HUMAN Hemopexin OS=Homo sapiens GN=HPX PE=1 SV=2	CSDGWSFDATTLDDNGTMLFFK	HexNAc(4)Hex(5)NeuAc(1)	0.0121	0.0205
sp|P02790|HEMO_HUMAN Hemopexin OS=Homo sapiens GN=HPX PE=1 SV=2	ALPQPQNVTSLLGCTH	HexNAc(5)Hex(6)NeuAc(1)	0.027
sp|P02790|HEMO_HUMAN Hemopexin OS=Homo sapiens GN=HPX PE=1 SV=2	CSDGWSFDATTLDDNGTMLFFK	HexNAc(4)Hex(5)Fuc(2)NeuAc(1)		0.0829
sp|P02790|HEMO_HUMAN Hemopexin OS=Homo sapiens GN=HPX PE=1 SV=2	CSDGWSFDATTLDDNGTMLFFK	HexNAc(4)Hex(5)NeuAc(2)	0.0889	0.176
sp|P02790|HEMO_HUMAN Hemopexin OS=Homo sapiens GN=HPX PE=1 SV=2	SWPAVGNCSSALR	HexNAc(4)Hex(5)Fuc(1)NeuAc(2)		0.0972
sp|P02790|HEMO_HUMAN Hemopexin OS=Homo sapiens GN=HPX PE=1 SV=2	LNAAKALPQPQNVTSLLGCTH	HexNAc(5)Hex(5)Fuc(1)NeuAc(1)	0.176
sp|P02790|HEMO_HUMAN Hemopexin OS=Homo sapiens GN=HPX PE=1 SV=2	ALPQPQNVTSLLGCTH	HexNAc(4)Hex(5)Fuc(1)NeuAc(1)	0.257	0.442
sp|P02790|HEMO_HUMAN Hemopexin OS=Homo sapiens GN=HPX PE=1 SV=2	SWPAVGNCSSALR	HexNAc(4)Hex(5)NeuAc(2)	0.613	0.71
sp|P02790|HEMO_HUMAN Hemopexin OS=Homo sapiens GN=HPX PE=1 SV=2	ALPQPQNVTSLLGCTH	HexNAc(4)Hex(5)NeuAc(1)	1.2	1.66
sp|P02790|HEMO_HUMAN Hemopexin OS=Homo sapiens GN=HPX PE=1 SV=2	ALPQPQNVTSLLGCTH	HexNAc(4)Hex(5)NeuAc(2)	1.69	3.92
sp|P03952|KLKB1_HUMAN Plasma kallikrein OS=Homo sapiens GN=KLKB1 PE=1 SV=1	IYSGILNLSDITK	HexNAc(4)Hex(5)Fuc(2)NeuAc(1)		0.00376
sp|P03952|KLKB1_HUMAN Plasma kallikrein OS=Homo sapiens GN=KLKB1 PE=1 SV=1	IVGGTNSSWGEWPWQVSLQVK	HexNAc(4)Hex(5)NeuAc(1)		0.0196
sp|P04004|VTNC_HUMAN Vitronectin OS=Homo sapiens GN=VTN PE=1 SV=1	NNATVHEQVGGPSLTSDLQAQSK	HexNAc(4)Hex(5)NeuAc(2)	0.0775	0.0466
sp|P04004|VTNC_HUMAN Vitronectin OS=Homo sapiens GN=VTN PE=1 SV=1	NGSLFAFR	HexNAc(3)Hex(5)NeuAc(1)	0.118	0.187
sp|P04114|APOB_HUMAN Apolipoprotein B-100 OS=Homo sapiens GN=APOB PE=1 SV=2	FVEGSHNSTVSLTTK	HexNAc(3)Hex(4)NeuAc(1)		0.0165
sp|P04114|APOB_HUMAN Apolipoprotein B-100 OS=Homo sapiens GN=APOB PE=1 SV=2	FVEGSHNSTVSLTTK	HexNAc(2)Hex(5)		0.0224
sp|P04114|APOB_HUMAN Apolipoprotein B-100 OS=Homo sapiens GN=APOB PE=1 SV=2	FVEGSHNSTVSLTTK	HexNAc(3)Hex(6)NeuAc(1)		0.0226
sp|P04114|APOB_HUMAN Apolipoprotein B-100 OS=Homo sapiens GN=APOB PE=1 SV=2	FVEGSHNSTVSLTTK	HexNAc(4)Hex(5)NeuAc(1)	0.102	0.112
sp|P04114|APOB_HUMAN Apolipoprotein B-100 OS=Homo sapiens GN=APOB PE=1 SV=2	FVEGSHNSTVSLTTK	HexNAc(3)Hex(5)NeuAc(1)	0.118	0.145
sp|P04196|HRG_HUMAN Histidine-rich glycoprotein OS=Homo sapiens GN=HRG PE=1 SV=1	VIDFNCTTSSVSSALANTK	HexNAc(4)Hex(5)NeuAc(2)		0.0372
sp|P04196|HRG_HUMAN Histidine-rich glycoprotein OS=Homo sapiens GN=HRG PE=1 SV=1	VIDFNCTTSSVSSALANTK	HexNAc(4)Hex(5)NeuAc(1)	0.384	0.32
sp|P05154|IPSP_HUMAN Plasma serine protease inhibitor OS=Homo sapiens GN=SERPINA5 PE=1 SV=3	VVGVPYQGNATALFILPSEGK	HexNAc(4)Hex(5)NeuAc(2)		0.00166
sp|P05155|IC1_HUMAN Plasma protease C1 inhibitor OS=Homo sapiens GN=SERPING1 PE=1 SV=2	VLSNNSDANLELINTWVAK	HexNAc(4)Hex(5)Fuc(1)NeuAc(2)	0.0282	0.00748
sp|P05155|IC1_HUMAN Plasma protease C1 inhibitor OS=Homo sapiens GN=SERPING1 PE=1 SV=2	DTFVNASR	HexNAc(4)Hex(5)NeuAc(2)		0.033
sp|P05155|IC1_HUMAN Plasma protease C1 inhibitor OS=Homo sapiens GN=SERPING1 PE=1 SV=2	VLSNNSDANLELINTWVAK	HexNAc(4)Hex(5)NeuAc(2)	0.0588	0.0437
sp|P05155|IC1_HUMAN Plasma protease C1 inhibitor OS=Homo sapiens GN=SERPING1 PE=1 SV=2	VGQLQLSHNLSLVILVPQNLK	HexNAc(4)Hex(5)NeuAc(2)		0.106
sp|P05156|CFAI_HUMAN Complement factor I OS=Homo sapiens GN=CFI PE=1 SV=2	FLNNGTCTAEGK	HexNAc(4)Hex(5)NeuAc(2)	0.0284	0.0396
sp|P05543|THBG_HUMAN Thyroxine-binding globulin OS=Homo sapiens GN=SERPINA7 PE=1 SV=2	VTACHSSQPNATLYK	HexNAc(4)Hex(5)NeuAc(2)	0.0425	0.0526
sp|P05546|HEP2_HUMAN Heparin cofactor 2 OS=Homo sapiens GN=SERPIND1 PE=1 SV=3	NLSMPLLPADFHK	HexNAc(4)Hex(5)NeuAc(1)		0.0472
sp|P05546|HEP2_HUMAN Heparin cofactor 2 OS=Homo sapiens GN=SERPIND1 PE=1 SV=3	NLSMPLLPADFHK	HexNAc(4)Hex(5)Fuc(2)NeuAc(1)	0.174	0.162
sp|P05546|HEP2_HUMAN Heparin cofactor 2 OS=Homo sapiens GN=SERPIND1 PE=1 SV=3	NLSMPLLPADFHK	HexNAc(4)Hex(5)Fuc(1)NeuAc(2)	0.191	0.153
sp|P05546|HEP2_HUMAN Heparin cofactor 2 OS=Homo sapiens GN=SERPIND1 PE=1 SV=3	NLSMPLLPADFHK	HexNAc(4)Hex(5)NeuAc(2)	0.771	0.882
sp|P06681|CO2_HUMAN Complement C2 OS=Homo sapiens GN=C2 PE=1 SV=2	QSVPAHFVALNGSK	HexNAc(3)Hex(6)	0.00394
sp|P06681|CO2_HUMAN Complement C2 OS=Homo sapiens GN=C2 PE=1 SV=2	QSVPAHFVALNGSK	HexNAc(3)Hex(6)NeuAc(1)	0.0376
sp|P06681|CO2_HUMAN Complement C2 OS=Homo sapiens GN=C2 PE=1 SV=2	QSVPAHFVALNGSK	HexNAc(2)Hex(8)	0.0555	0.0525
sp|P06681|CO2_HUMAN Complement C2 OS=Homo sapiens GN=C2 PE=1 SV=2	QSVPAHFVALNGSK	HexNAc(2)Hex(5)	0.254	0.239
sp|P06681|CO2_HUMAN Complement C2 OS=Homo sapiens GN=C2 PE=1 SV=2	QSVPAHFVALNGSK	HexNAc(2)Hex(7)	0.366	0.316
sp|P06681|CO2_HUMAN Complement C2 OS=Homo sapiens GN=C2 PE=1 SV=2	QSVPAHFVALNGSK	HexNAc(2)Hex(6)	0.533	0.514
sp|P08185|CBG_HUMAN Corticosteroid-binding globulin OS=Homo sapiens GN=SERPINA6 PE=1 SV=1	AQLLQGLGFNLTER	HexNAc(5)Hex(6)NeuAc(2)	0.00955	0.0444
sp|P08185|CBG_HUMAN Corticosteroid-binding globulin OS=Homo sapiens GN=SERPINA6 PE=1 SV=1	AQLLQGLGFNLTER	HexNAc(5)Hex(6)NeuAc(1)	0.0283
sp|P08185|CBG_HUMAN Corticosteroid-binding globulin OS=Homo sapiens GN=SERPINA6 PE=1 SV=1	AQLLQGLGFNLTER	HexNAc(4)Hex(5)NeuAc(2)	0.109	0.201
sp|P08603|CFAH_HUMAN Complement factor H OS=Homo sapiens GN=CFH PE=1 SV=4	ISEENETTCYMGK	HexNAc(4)Hex(5)NeuAc(2)	0.0219
sp|P08603|CFAH_HUMAN Complement factor H OS=Homo sapiens GN=CFH PE=1 SV=4	MDGASNVTCINSR	HexNAc(4)Hex(5)NeuAc(2)	0.0311
sp|P08603|CFAH_HUMAN Complement factor H OS=Homo sapiens GN=CFH PE=1 SV=4	IPCSQPPQIEHGTINSSR	HexNAc(4)Hex(5)Fuc(2)NeuAc(1)	0.0361
sp|P08603|CFAH_HUMAN Complement factor H OS=Homo sapiens GN=CFH PE=1 SV=4	IPCSQPPQIEHGTINSSR	HexNAc(4)Hex(5)NeuAc(2)	0.187	0.171
sp|P09172|DOPO_HUMAN Dopamine beta-hydroxylase OS=Homo sapiens GN=DBH PE=1 SV=3	ALYSFAPISMHCNK	HexNAc(2)Hex(8)	0.0915	0.152
sp|P09172|DOPO_HUMAN Dopamine beta-hydroxylase OS=Homo sapiens GN=DBH PE=1 SV=3	ALYSFAPISMHCNK	HexNAc(2)Hex(7)	0.128	0.179
sp|P09172|DOPO_HUMAN Dopamine beta-hydroxylase OS=Homo sapiens GN=DBH PE=1 SV=3	ALYSFAPISMHCNK	HexNAc(2)Hex(6)	0.381	0.273
sp|P09172|DOPO_HUMAN Dopamine beta-hydroxylase OS=Homo sapiens GN=DBH PE=1 SV=3	ALYSFAPISMHCNK	HexNAc(2)Hex(5)	0.516	0.581
sp|P0C0L4|CO4A_HUMAN Complement C4-A OS=Homo sapiens GN=C4A PE=1 SV=2	FSDGLESNSSTQFEVK	HexNAc(2)Hex(9)		0.0664
sp|P0C0L4|CO4A_HUMAN Complement C4-A OS=Homo sapiens GN=C4A PE=1 SV=2	GLNVTLSSTGR	HexNAc(4)Hex(5)NeuAc(2)		0.103
sp|P10643|CO7_HUMAN Complement component C7 OS=Homo sapiens GN=C7 PE=1 SV=2	INNDFNYEFYNSTWSYVK	HexNAc(2)Hex(5)	0.152	0.0571
sp|P12259|FA5_HUMAN Coagulation factor V OS=Homo sapiens GN=F5 PE=1 SV=4	VSAITLVSATSTTANMTVGPEGK	HexNAc(2)Hex(9)	0.0483
sp|P19827|ITIH1_HUMAN Inter-alpha-trypsin inhibitor heavy chain H1 OS=Homo sapiens GN=ITIH1 PE=1 SV=3	ICDLLVANNHFAHFFAPQNLTNMNK	HexNAc(4)Hex(5)NeuAc(2)	0.46	0.729
sp|P22792|CPN2_HUMAN Carboxypeptidase N subunit 2 OS=Homo sapiens GN=CPN2 PE=1 SV=3	AFGSNPNLTK	HexNAc(4)Hex(5)NeuAc(2)		0.0454
sp|P43251|BTD_HUMAN Biotinidase OS=Homo sapiens GN=BTD PE=1 SV=2	DVQIIVFPEDGIHGFNFTR	HexNAc(4)Hex(5)NeuAc(2)	0.0201	0.0267
sp|P43652|AFAM_HUMAN Afamin OS=Homo sapiens GN=AFM PE=1 SV=1	DIENFNSTQK	HexNAc(4)Hex(5)NeuAc(2)		0.0442
sp|P43652|AFAM_HUMAN Afamin OS=Homo sapiens GN=AFM PE=1 SV=1	YAEDKFNETTEK	HexNAc(4)Hex(5)NeuAc(2)	0.0543	0.0492
sp|P51884|LUM_HUMAN Lumican OS=Homo sapiens GN=LUM PE=1 SV=2	LHINHNNLTESVGPLPK	HexNAc(4)Hex(5)Fuc(1)		0.0232
sp|P51884|LUM_HUMAN Lumican OS=Homo sapiens GN=LUM PE=1 SV=2	KLHINHNNLTESVGPLPK	HexNAc(5)Hex(6)Fuc(1)NeuAc(2)		0.0303
sp|P51884|LUM_HUMAN Lumican OS=Homo sapiens GN=LUM PE=1 SV=2	KLHINHNNLTESVGPLPK	HexNAc(7)Hex(8)Fuc(1)NeuAc(1)		0.0473
sp|P51884|LUM_HUMAN Lumican OS=Homo sapiens GN=LUM PE=1 SV=2	LHINHNNLTESVGPLPK	HexNAc(4)Hex(5)Fuc(1)NeuAc(2)	0.0636
sp|P51884|LUM_HUMAN Lumican OS=Homo sapiens GN=LUM PE=1 SV=2	LHINHNNLTESVGPLPK	HexNAc(5)Hex(6)Fuc(1)NeuAc(1)	0.0718	0.075
sp|P51884|LUM_HUMAN Lumican OS=Homo sapiens GN=LUM PE=1 SV=2	KLHINHNNLTESVGPLPK	HexNAc(5)Hex(6)Fuc(1)NeuAc(1)	0.0829	0.0908
sp|P51884|LUM_HUMAN Lumican OS=Homo sapiens GN=LUM PE=1 SV=2	LHINHNNLTESVGPLPK	HexNAc(4)Hex(5)Fuc(1)NeuAc(1)	0.11	0.135
sp|P51884|LUM_HUMAN Lumican OS=Homo sapiens GN=LUM PE=1 SV=2	KLHINHNNLTESVGPLPK	HexNAc(4)Hex(5)Fuc(1)NeuAc(2)	0.124	0.124
sp|P51884|LUM_HUMAN Lumican OS=Homo sapiens GN=LUM PE=1 SV=2	KLHINHNNLTESVGPLPK	HexNAc(4)Hex(5)Fuc(1)NeuAc(1)		0.147
sp|P80108|PHLD_HUMAN Phosphatidylinositol-glycan-specific phospholipase D OS=Homo sapiens GN=GPLD1 PE=1 SV=3	LGTSLSSGHVLMNGTLK	HexNAc(4)Hex(5)NeuAc(1)		0.0285
sp|Q04756|HGFA_HUMAN Hepatocyte growth factor activator OS=Homo sapiens GN=HGFAC PE=1 SV=1	DSVSVVLGQHFFNR	HexNAc(4)Hex(5)NeuAc(2)		0.0415
sp|Q04756|HGFA_HUMAN Hepatocyte growth factor activator OS=Homo sapiens GN=HGFAC PE=1 SV=1	DSVSVVLGQHFFNR	HexNAc(4)Hex(5)Fuc(2)NeuAc(1)	0.057
sp|Q07954|LRP1_HUMAN Prolow-density lipoprotein receptor-related protein 1 OS=Homo sapiens GN=LRP1 PE=1 SV=2	LYWISSGNHTINR	HexNAc(2)Hex(6)	0.0429	0.0333
sp|Q07954|LRP1_HUMAN Prolow-density lipoprotein receptor-related protein 1 OS=Homo sapiens GN=LRP1 PE=1 SV=2	LYWISSGNHTINR	HexNAc(2)Hex(5)	0.103	0.072
sp|Q16853|AOC3_HUMAN Membrane primary amine oxidase OS=Homo sapiens GN=AOC3 PE=1 SV=3	QPQPNVSELVVGPLPHPSYMR	HexNAc(2)Hex(5)	0.137
sp|Q8IZF2|AGRF5_HUMAN Adhesion G protein-coupled receptor F5 OS=Homo sapiens GN=ADGRF5 PE=1 SV=3	VLQQQWTNQSSQLLHSVER	HexNAc(2)Hex(5)		0.0484
sp|Q96PD5|PGRP2_HUMAN N-acetylmuramoyl-L-alanine amidase OS=Homo sapiens GN=PGLYRP2 PE=1 SV=1	LEPVHLQLQCMSQEQLAQVAANATK	HexNAc(4)Hex(7)NeuAc(1)	1.35e-05
sp|Q96PD5|PGRP2_HUMAN N-acetylmuramoyl-L-alanine amidase OS=Homo sapiens GN=PGLYRP2 PE=1 SV=1	GFGVAIVGNYTAALPTEAALR	HexNAc(4)Hex(5)Fuc(2)NeuAc(1)		0.00577
sp|Q96PD5|PGRP2_HUMAN N-acetylmuramoyl-L-alanine amidase OS=Homo sapiens GN=PGLYRP2 PE=1 SV=1	GFGVAIVGNYTAALPTEAALR	HexNAc(4)Hex(5)NeuAc(2)	0.0437	0.0879
sp|Q96PD5|PGRP2_HUMAN N-acetylmuramoyl-L-alanine amidase OS=Homo sapiens GN=PGLYRP2 PE=1 SV=1	LEPVHLQLQCMSQEQLAQVAANATK	HexNAc(4)Hex(5)NeuAc(2)	0.692	1.49
sp|Q9UGM5|FETUB_HUMAN Fetuin-B OS=Homo sapiens GN=FETUB PE=1 SV=2	VLYLAAYNCTLRPVSK	HexNAc(4)Hex(5)NeuAc(1)	0.0671
sp|Q9Y6R7|FCGBP_HUMAN IgGFc-binding protein OS=Homo sapiens GN=FCGBP PE=1 SV=3	NPNNDQVFPNGTLAPSIPIWGGSWR	HexNAc(4)Hex(5)Fuc(1)NeuAc(1)		0.0116
sp|Q9Y6R7|FCGBP_HUMAN IgGFc-binding protein OS=Homo sapiens GN=FCGBP PE=1 SV=3	VVTVAALGTNISIHK	HexNAc(5)Hex(5)		0.111
sp|Q9Y6R7|FCGBP_HUMAN IgGFc-binding protein OS=Homo sapiens GN=FCGBP PE=1 SV=3	VITVQVANFTLR	HexNAc(4)Hex(5)Fuc(1)NeuAc(1)	0.129	0.194
sp|Q9Y6R7|FCGBP_HUMAN IgGFc-binding protein OS=Homo sapiens GN=FCGBP PE=1 SV=3	VVTVAALGTNISIHK	HexNAc(4)Hex(5)NeuAc(1)	0.191	0.264
Note: the numbers from column D and E correspond to the percentage of the indivdual glyopeptides from the whole column (one injection).
